# Supplementary material
Source: PubMed Central journal article supplement (PMC6781487)
Supplement: cs9b02841_si_001.pdf [file cs9b02841_si_001.pdf]

# Supporting Information

## Gold-catalyzed C-H functionalization with aryl germanes

Christoph Fricke, Amit Dahiya, William B. Reid and Franziska Schoenebeck\*

Institute of Organic Chemistry, RWTH Aachen University, Landoltweg 1, 52074 Aachen  
(Germany)

*\*Corresponding author. Email: [franziska.schoenebeck@rwth-aachen.de](mailto:franziska.schoenebeck@rwth-aachen.de)*

## Contents

|                                                                                     |    |
|-------------------------------------------------------------------------------------|----|
| General Information.....                                                            | 2  |
| Mechanistic Investigation.....                                                      | 3  |
| Stoichiometric Transmetalation Experiments with Au <sup>(III)</sup> Complexes ..... | 3  |
| Stoichiometric Transmetalation Experiments with Au <sup>(I)</sup> Complexes .....   | 4  |
| Reaction Development.....                                                           | 6  |
| Competition Experiments.....                                                        | 7  |
| Determination of Individual Reaction Rates.....                                     | 7  |
| Intermolecular Competition Experiments.....                                         | 8  |
| Synthesis of Aryl Germanes .....                                                    | 9  |
| General Procedure 1 (GP 1) .....                                                    | 9  |
| General Procedure 2 (GP 2) .....                                                    | 9  |
| C–H Functionalization of Arenes .....                                               | 14 |
| General Procedure 3 (GP 3) .....                                                    | 14 |
| Computational Details.....                                                          | 26 |
| General Details .....                                                               | 26 |
| Distortion/Interaction Analysis.....                                                | 26 |
| Bond Dissociation Energies .....                                                    | 27 |
| Bond Activation with Au <sup>(III)</sup> .....                                      | 28 |
| Bond Activation with Au <sup>(I)</sup> .....                                        | 28 |
| XYZ Coordinates and Energies of Optimized Structures .....                          | 29 |
| General Structures.....                                                             | 29 |
| Bond Activation with Au <sup>(III)</sup> .....                                      | 30 |
| Bond Activation with Au <sup>(I)</sup> .....                                        | 37 |
| Bond Dissociation Energies .....                                                    | 44 |
| NMR Spectra.....                                                                    | 45 |
| References.....                                                                     | 69 |

## General Information

### Reagents and Solvents

Unless otherwise stated, all reagents and starting materials were commercially available and used as received. Solvents used in work up and purification were distilled prior to use. Anhydrous and degassed 1,4-dioxane was purchased from Sigma Aldrich.  $[(\text{Ph}_3\text{P})\text{Au}][\text{X}]$  ( $\text{X} = \text{OAc}, \text{OTs}, \text{BF}_4$ ) were synthesized according to literature reported procedures.<sup>1</sup>

### Experimental Techniques

All reactions involving air- or moisture-sensitive reagents or intermediates were carried out in dried glassware under an argon atmosphere and were performed either in an argon-filled glovebox or by using standard *Schlenk* techniques unless otherwise stated.

Column chromatography was carried out using silica gel (35–70 mesh; 60 Å). Thin layer chromatography (TLC) was performed on Merck silica gel 60 F254 aluminum plates; detection either under UV light or by dipping into a solution of  $\text{KMnO}_4$  (1.5 g) and  $\text{NaHCO}_3$  (5.0 g) in  $\text{H}_2\text{O}$  (400 mL) followed by heating. Preparative HPLC was performed on a Gilson-Abimed HPLC (employing UV detector model 117) using a Merck LiChrosorb Si60 column (porosity 7  $\mu\text{m}$ , 250 x 25 mm).

All  $^1\text{H}$ ,  $^{13}\text{C}$  and  $^{19}\text{F}$  NMR spectra were recorded at ambient temperature on a Varian V NMRS 600 or a Varian V NMRS 400 spectrometer. Chemical shifts ( $\delta$ ) are reported in parts per million (ppm) relative to  $\text{SiMe}_4$  and referenced to either the residual solvent peak (for  $^1\text{H}$  and  $^{13}\text{C}$  NMR spectra) or internally by the instrument after locking and shimming to the deuterated solvent (for  $^{19}\text{F}$ ). Coupling constants ( $J$ ) are given in Hertz (Hz).

High-resolution mass spectrometry (HRMS) was performed using a Thermo Scientific LTQ Orbitrap XL (ESI) or an Finnigan MAT95 (EI, 70 eV). IR spectra were recorded on a Spectrum 100 spectrometer with an UATR Diamond/KRS-5 crystal with attenuated total reflectance (ATR).

Low-resolution mass spectrometry and reaction monitoring were performed with an Agilent Technologies 5975 series MSD mass spectrometer under electron ionization (EI) mode coupled with an Agilent Technologies 7820A gas chromatograph employing an Agilent HP-5MS column (30 m x 0.25 mm inner diameter x 0.25  $\mu\text{m}$  (5% phenyl)-methylpolysiloxane film) or an Agilent CP-Sil8-CB column (30 m x 0.25 mm inner diameter x 1.00  $\mu\text{m}$  (5% phenyl)-methylpolysiloxane film). Operating with a constant He-flow of 1.2  $\text{mL min}^{-1}$ , injector temperature 250 °C, detector-line temperature 280 °C.

## Mechanistic Investigation

### Stoichiometric Transmetalation Experiments with Au<sup>(III)</sup> Complexes

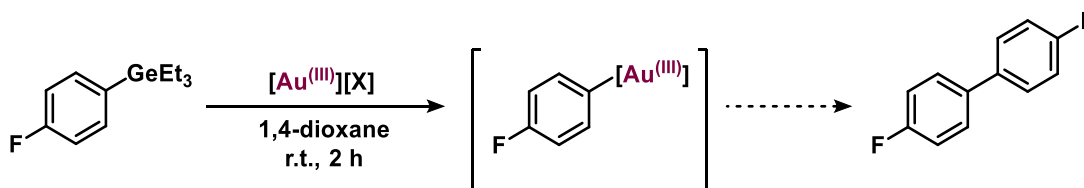

*X = Br and OAc:*

In a glovebox, [Au<sup>(III)</sup>X<sub>3</sub>] (X = Br or OAc; 0.03 mmol, 1.0 equiv.) and triethyl(4-fluorophenyl)germane (8.0 mg, 0.03 mmol, 1.0 equiv.) were dissolved in 1,4-dioxane (0.3 mL) and stirred for 2 h at room temperature. The reaction was analyzed by GC-MS and <sup>19</sup>F NMR analysis. The results are shown in Table S1 and discussed below.

*X = OCSA (camphorsulfonate):*

In a glovebox, [(Ph<sub>3</sub>P)Au<sup>(I)</sup>][Cl] (14.8 mg, 0.03 mmol, 1.0 equiv.) PhI(OAc)<sub>2</sub> (14.5 mg, 0.045 mmol, 1.5 equiv) and camphorsulfonic acid (10.4 mg, 0.045 mmol, 1.5 equiv.) were dissolved in 1,4-dioxane (0.3 mL) and stirred for 20 min to form [Au(OCSA)<sub>3</sub>] *in situ*. Triethyl(4-fluorophenyl)germane (dissolved in 1,4-dioxane; 8.0 mg, 0.03 mmol, 1.0 equiv.) was added and stirred for 2 h at room temperature. The reaction was analyzed by GC-MS and <sup>19</sup>F NMR analysis. The results are shown in Table S1 and discussed below.

**Table S1:** Stoichiometric Transmetalation with Au<sup>(III)</sup>.

| entry | [X]               | consumption ArGeEt <sub>3</sub> [%] <sup>a</sup> |
|-------|-------------------|--------------------------------------------------|
| 1     | Br                | 0                                                |
| 2     | OAc               | 0                                                |
| 3     | OCSA <sup>b</sup> | 90                                               |

<sup>a</sup>Yields by <sup>19</sup>F NMR analysis using 1,4-difluorobenzene as internal standard <sup>b</sup>OCSA = camphorsulfonate.

*R = Br and OAc (entries 1 and 2):*

No reaction after 12 h at room temperature or at 70 °C.

*R = OCSA (entry 3):*

After 2 h, <sup>1</sup>H NMR and GC-MS analysis revealed 90% consumption of triethyl(4-fluorophenyl)germane and formation of the homocoupling product 4,4'-difluoro-1,1'-biphenyl (45%; observed in GC-MS and *in-situ* <sup>19</sup>F NMR analysis using mesitylene or 1,4-

difluorobenzene as internal standard, respectively). This observation supports the formation of an Ar–Au<sup>(III)</sup> species which subsequently performs reductive elimination – bimetallic with second equivalent of [(Ar)Au<sup>(III)</sup>] or after second transmetalation with aryl germane – to form the homocoupling product. Since the gold(III) center is non-ligated with stabilizing ligands and hence rather reactive, the reductive elimination occurs immediately after double transmetalation. It is hence not possible to isolate such highly reactive species. This observation is consistent with mechanistic investigations for aryl silanes.<sup>2</sup>

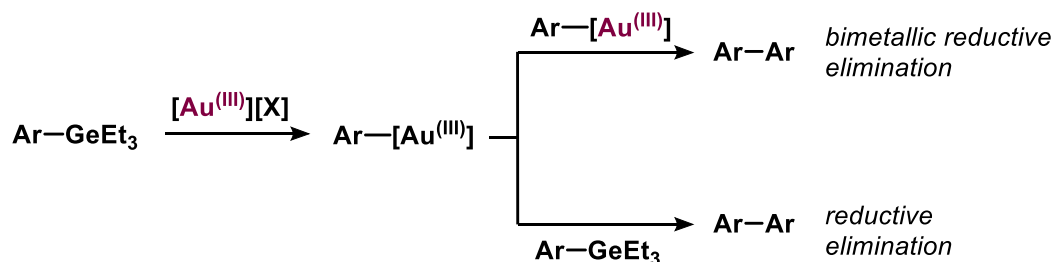

### Stoichiometric Transmetalation Experiments with Au<sup>(I)</sup> Complexes

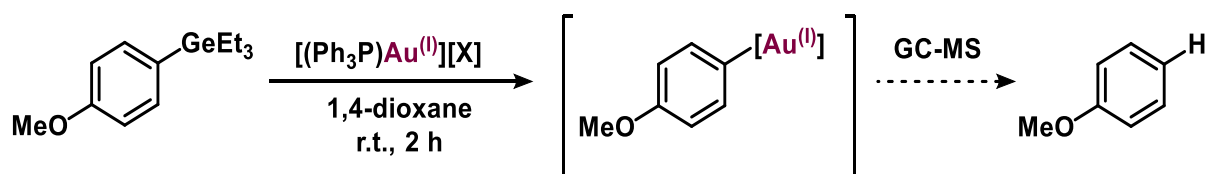

In a glovebox, [(Ph<sub>3</sub>P)Au<sup>(I)</sup>][X] (1.0 equiv.) and triethyl(4-methoxy)germane (8.0 mg, 0.03 mmol, 1.0 equiv.) were dissolved in 1,4-dioxane (0.3 mL) and stirred for 2 h at room temperature. The reaction was analyzed by GC-MS analysis. The results are shown in Table S2 and discussed below.

**Table S2:** Stoichiometric Transmetalation with Au<sup>(I)</sup>.

| entry | [X]             | consumption ArGeEt <sub>3</sub> [%] <sup>a</sup> | yield anisole [%] <sup>a</sup> |
|-------|-----------------|--------------------------------------------------|--------------------------------|
| 1     | Cl              | 0                                                | 0                              |
| 2     | OAc             | 0                                                | 0                              |
| 3     | OTf             | 100                                              | 96                             |
| 4     | BF <sub>4</sub> | 100                                              | 34                             |

<sup>a</sup>Yields by calibrated gas chromatography using mesitylene as the internal standard.

*Coordinating counterions (Cl, OAc; entries 1 and 2):*

No reaction after 12 h at room temperature or at 70 °C.

*Non-coordinating OTf counterion (entry 3):*

After 2 h,  $^1\text{H}$  NMR and GC-MS analysis revealed full consumption of triethyl(4-methoxy)germane and formation of new species. Calibrated GC-MS revealed quantitative formation of anisole. This observation supports the formation of a metal-organic species  $\text{Ar-Au}^{(0)}$  which is quenched under injection conditions of the GC-MS to form anisole. It was not possible to isolate or characterize the corresponding  $[(\text{Ar})\text{Au}^{(0)}]$  species by NMR analysis since the resulting signals in  $^1\text{H}$  NMR were rather broad, indicating an equilibrium of different products. Nevertheless, electrospray ionization mass spectrometry (ESI-MS) unambiguously confirmed, that the observable species is in fact not  $[(\text{Ph}_3\text{P})\text{Au}(\text{Ar})]$  but a *gem*-diaurated  $[(\text{Ph}_3\text{P})_2\text{Au}_2(\text{Ar})][\text{OTf}]$ . Those species have been reported to occur as an overreaction of  $[(\text{Ph}_3\text{P})\text{Au}(\text{Ar})]$  with a further equivalent of  $[(\text{Ph}_3\text{P})\text{Au}][\text{X}]$ .<sup>1a,3</sup> This explanation is consistent with the experimental observations.

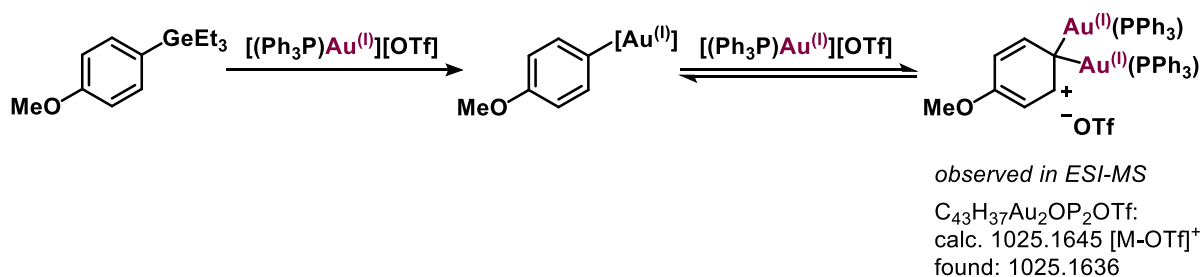*Non-coordinating BF<sub>4</sub> counterion (entry 4):*

Reaction with  $[(\text{Ph}_3\text{P})\text{Au}^{(0)}][\text{BF}_4]$  showed full consumption of triethyl(4-methoxy)germane and formation of anisole (34%) and 4,4'-dimethoxy-1,1'-biphenyl (GC-MS analysis). Again, the corresponding  $[(\text{Ar})\text{Au}^{(0)}]$  complex was not observed. Instead the formation of  $[(\text{Ph}_3\text{P})_2\text{Au}_2(\text{Ar})]^+$  was confirmed by ESI-MS. Additionally, the rather electrophilic nature of this non-coordinated gold complex is likely to result in disproportionation to give gold(0) (black and golden precipitate observable) and an  $\text{Au}^{(III)}$ -aryl species. The  $\text{Au}^{(III)}$ -aryl species undergoes subsequent reductive elimination, explaining the formation of the homocoupling product. GC-MS analysis additionally confirmed the formation of  $\text{Et}_3\text{GeF}$ , a decomposition product of  $\text{Et}_3\text{GeBF}_4$  after transmetalation.

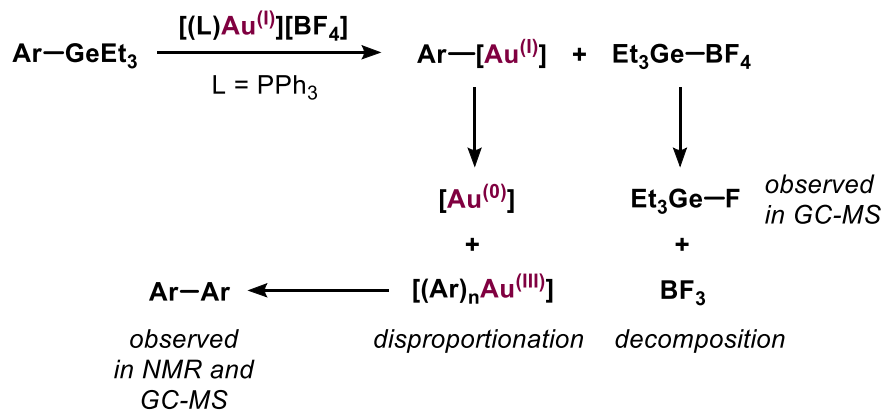

## Reaction Development

*established conditions for aryl silanes*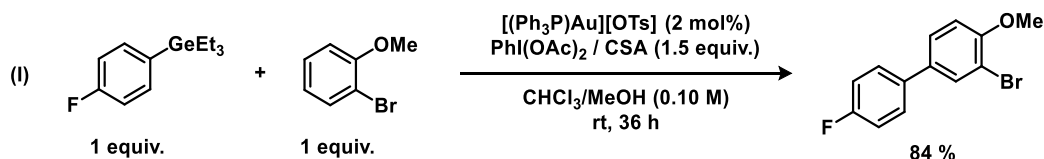*established conditions for aryl boronic esters*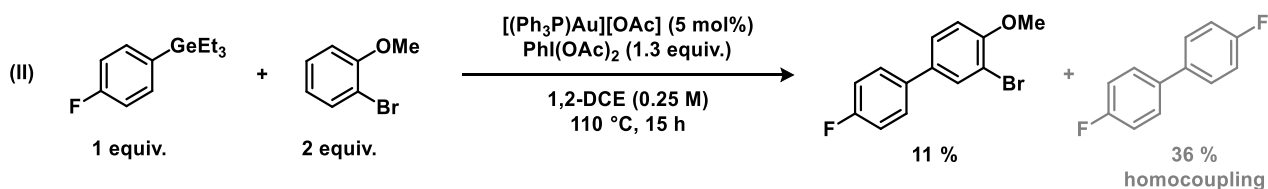*our conditions*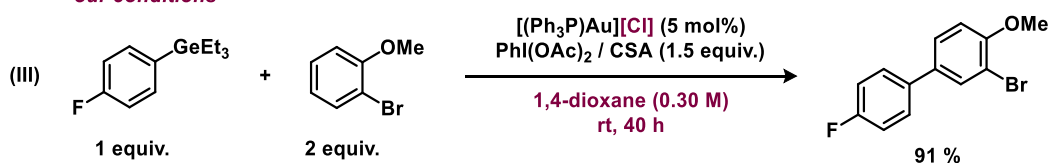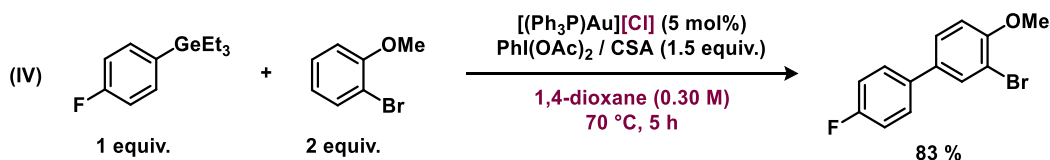

2-Bromoanisole, PhI(OAc)<sub>2</sub> (48.3 mg, 0.15 mmol, 1.5 equiv.), [(Ph<sub>3</sub>P)Au][X] and triethyl(4-fluorophenyl)germane (25.6 mg, 0.10 mmol, 1.0 equiv.) [and for **II**, **III** and **IV** camphorsulfonic acid] were added to a reaction vial, dissolved in solvent and stirred under conditions as specified in the scheme above. The solvent was evaporated and subsequently analyzed by quantitative <sup>19</sup>F NMR analysis. Products were quantified *via* an internal standard (1,4-difluorobenzene, 1.0 equiv.).

## Competition Experiments

### Determination of Individual Reaction Rates

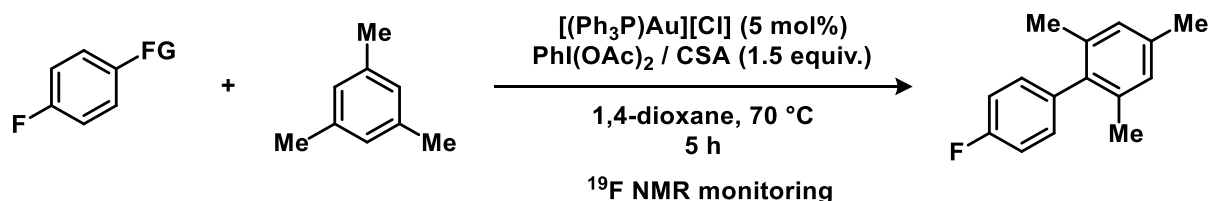

Mesitylene (55.9  $\mu\text{L}$ , 0.40 mmol, 2.0 equiv.),  $\text{PhI}(\text{OAc})_2$  (96.6 mg, 0.30 mmol, 1.5 equiv.), CSA (69.7 mg, 0.30 mmol, 1.5 equiv.),  $[(\text{Ph}_3\text{P})\text{AuCl}]$  (4.6 mg, 0.01 mmol, 5.0 mol%) and triethyl(4-fluorophenyl)germane (51.0 mg, 0.20 mmol, 1.0 equiv.) **or** (4-fluorophenyl)trimethylsilane (**FG = SiMe<sub>3</sub>**; 33.7 mg, 0.20 mmol, 1.0 equiv.) **or** 2-(4-fluorophenyl)-4,4,5,5-tetramethyl-1,3,2-dioxaborolane (**FG = Bpin**; 44.4 mg, 0.20 mmol, 1.0 equiv.) were added to a reaction vial, dissolved in 1,4-dioxane- $d_8$  (0.65 mL) and transferred to a NMR tube. The reaction was monitored at 70 °C (heated in the NMR spectrometer) *via*  $^{19}\text{F}$  NMR analysis for 4 h (quantified with 1,4-difluorobenzene as the internal standard). The results are shown in Figure S1.

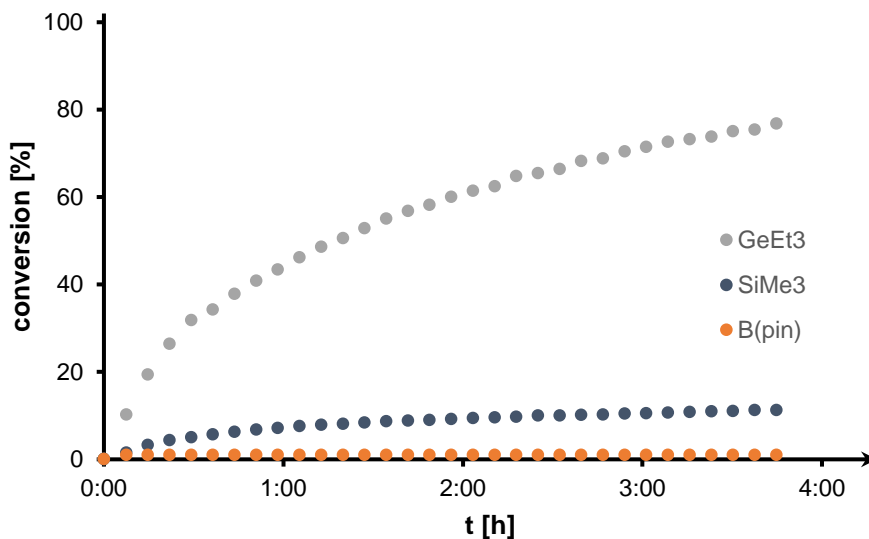

**Figure S1:** Individual reaction rates of C–H functionalization (formation of product [%] *versus* time [h]). Yields determined by quantitative  $^{19}\text{F}$  NMR using 1,4-difluorobenzene as internal standard.



## Intermolecular Competition Experiments

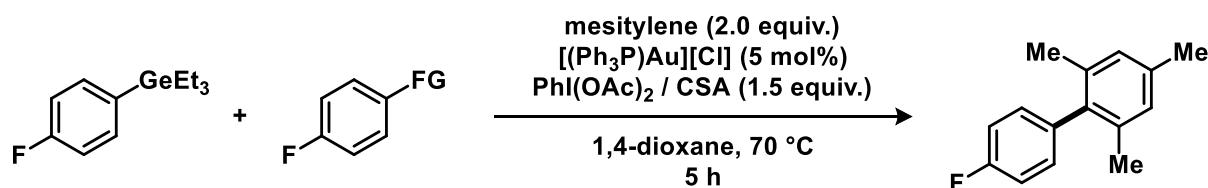

Mesitylene (55.9  $\mu$ L, 0.40 mmol, 2.0 equiv.), PhI(OAc)<sub>2</sub> (96.6 mg, 0.30 mmol, 1.5 equiv.), CSA (69.7 mg, 0.30 mmol, 1.5 equiv.), [(Ph<sub>3</sub>P)AuCl] (4.6 mg, 0.01 mmol, 5.0 mol%), triethyl(4-fluorophenyl)germane (51.0 mg, 0.20 mmol, 1.0 equiv.) **and** (4-fluorophenyl)trimethylsilane (33.7 mg, 0.20 mmol, 1.0 equiv.) **or** 2-(4-fluorophenyl)-4,4,5,5-tetramethyl-1,3,2-dioxaborolane (44.4 mg, 0.20 mmol, 1.0 equiv.) were added to a reaction vial, dissolved in 1,4-dioxane-d<sub>8</sub> (0.65 mL) and stirred for 12 h at 70 °C. The reaction mixture was quenched by dilution with dioxane-d<sub>8</sub> and subsequently analyzed by <sup>19</sup>F NMR analysis. Starting material and products were quantified *via* an internal standard (1,4-difluorobenzene, 1.0 equiv.). The results are shown in Table S3.

**Table S3:** Intermolecular competition of aryl germanes with aryl silane and aryl boronic ester.

| entry | FG                | consumption of ArGeEt <sub>3</sub> <sup>a</sup> | consumption of Ar[SiMe <sub>3</sub> /B(pin)] <sup>a</sup> | product yield <sup>a</sup> |
|-------|-------------------|-------------------------------------------------|-----------------------------------------------------------|----------------------------|
| 1     | SiMe <sub>3</sub> | 100%                                            | 0%                                                        | 70%                        |
| 2     | B(pin)            | 100%                                            | 0%                                                        | 46% <sup>b</sup>           |

<sup>a</sup>Yields determined by <sup>19</sup>F NMR using 1,4-difluorobenzene as internal standard. <sup>b</sup>Low product yield results from homocoupling of aryl germane.

## Synthesis of Aryl Germanes

### General Procedure 1 (GP 1)

Triethylgermanium chloride (1.05 equiv.) and the corresponding aryl iodide or aryl bromide (1.0 equiv.) were dissolved in anhydrous and degassed tetrahydrofuran (THF) (0.2 M) under an argon atmosphere. A solution of *i*PrMgCl (1.2 equiv.) was added slowly and the reaction solution was stirred for 3 h at room temperature. The reaction was quenched by addition of aqueous solution of NH<sub>4</sub>Cl (sat.), the organic phase was separated and the aqueous phase was extracted with dichloromethane (DCM) (3x). The combined organic phases were dried with MgSO<sub>4</sub>, filtered through Celite, the solvent was removed under reduced pressure and the crude product mixture was purified by silica gel column chromatography.

### General Procedure 2 (GP 2)

Triethylgermanium chloride (1.0 equiv.) and the corresponding aryl Grignard reagent (1.1 equiv.) were dissolved in anhydrous and degassed THF (0.2 M) under argon and stirred for 3 h at room temperature. The reaction was quenched by addition of aqueous solution of NH<sub>4</sub>Cl (sat.), the organic phase was separated and the aqueous phase was extracted with DCM (3x). The combined organic phases were dried with MgSO<sub>4</sub>, filtered through Celite, the solvent was removed under reduced pressure and the crude product mixture was purified by silica gel column chromatography.

### Triethyl(4-fluorophenyl)germane

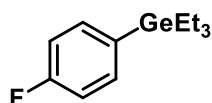

Prepared according to GP 2 by using 4-fluorophenyl magnesium chloride. The title product was obtained after purification by column chromatography (pentane) as a colorless oil (732 mg, 2.87 mmol, 96%).

**R<sub>f</sub>** = 0.85 (pentane). **<sup>1</sup>H NMR** (600 MHz, CDCl<sub>3</sub>) δ/ ppm = 7.43 – 7.36 (dd, *J* = 7.9 Hz, 2H), 7.09 – 7.01 (dd, *J* = 8.8 Hz, 2H), 1.05 (t, *J* = 7.5 Hz, 9H), 1.01 – 0.94 (m, 6H). **<sup>13</sup>C NMR** (151 MHz, CDCl<sub>3</sub>) δ/ ppm = 163.4 (d, *J* = 246.4 Hz), 135.7 (d, *J* = 6.9 Hz), 135.0 (d, *J* = 3.7 Hz), 115.1 (d, *J* = 19.1 Hz), 9.0, 4.4. **<sup>19</sup>F NMR** (564 MHz, CDCl<sub>3</sub>) δ/ ppm = -113.75 – -113.84 (m). **HRMS** (EI) calculated for C<sub>12</sub>H<sub>19</sub>F<sup>74</sup>Ge: 256.0683 [M]<sup>+</sup>, found: 256.0673. **IR** (neat): ν/ cm<sup>-1</sup> = 3029 (w), 2949 (s), 2875 (s), 2332 (w), 2162 (w), 2092 (w), 1890 (w), 1752 (w), 1636 (w), 1584 (s), 1495 (s), 1459 (m), 1380 (w), 1304 (w), 1226 (s), 1160 (s), 1082 (m), 1014 (s), 965 (m), 816 (s), 698 (s).

**Triethyl(4-(trifluoromethyl)phenyl)germane**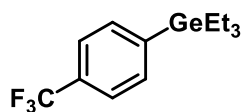

Prepared according to GP 1 by using 1-iodo-4-(trifluoromethyl)benzene.

The title product was obtained after purification by column chromatography (pentane) as a colorless oil (815 mg, 2.67 mmol, 89%).

$R_f$  = 0.93 (pentane).  $^1\text{H NMR}$  (600 MHz,  $\text{CDCl}_3$ )  $\delta$ / ppm = 7.57 (d,  $J$  = 8.1 Hz, 2H), 7.55 (d,  $J$  = 8.1 Hz, 2H), 1.08 – 0.99 (m, 15H).  $^{13}\text{C NMR}$  (151 MHz,  $\text{CDCl}_3$ )  $\delta$ / ppm = 145.3, 134.4, 130.4 (q,  $J$  = 32.0 Hz), 124.5 (q,  $J$  = 272.0 Hz), 124.4 (q,  $J$  = 3.7 Hz), 9.0, 4.3.  $^{19}\text{F NMR}$  (376 MHz,  $\text{CDCl}_3$ )  $\delta$ / ppm = -62.83. **HRMS** (EI) calculated for  $\text{C}_{13}\text{H}_{19}\text{F}_3^{74}\text{Ge}$ : 306.0651  $[\text{M}]^+$ , found: 306.0645. **IR** (neat):  $\nu/\text{cm}^{-1}$  = 2951 (s), 2876 (m), 2650 (w), 2326 (w), 2105 (w), 1999 (w), 1921 (w), 1604 (w), 1460 (w), 1389 (m), 1322 (s), 1230 (w), 1161 (s), 1126 (s), 1055 (m), 1014 (m), 961 (w), 823 (s), 693 (s).

**Triethyl(2-fluorophenyl)germane**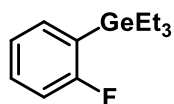

Prepared according to GP 1 by using 1-fluoro-2-iodobenzene. The title product was obtained after purification by column chromatography (hexane) as a colorless liquid (668 mg, 2.61 mmol, 87%).

$R_f$  = 0.84 (pentane).  $^1\text{H NMR}$  (600 MHz,  $\text{CDCl}_3$ )  $\delta$ / ppm = 7.38 – 7.29 (m, 2H), 7.15 – 7.09 (m, 1H), 7.03 – 6.96 (m, 1H), 1.09 – 1.02 (m, 15H).  $^{13}\text{C NMR}$  (151 MHz,  $\text{CDCl}_3$ )  $\delta$ / ppm = 166.9 (d,  $J$  = 238.4 Hz), 135.6 (d,  $J$  = 12.5 Hz), 130.5 (d,  $J$  = 7.9 Hz), 125.3 (d,  $J$  = 35.7 Hz), 123.9 (d,  $J$  = 2.9 Hz), 114.7 (d,  $J$  = 26.5 Hz), 9.0, 4.7.  $^{19}\text{F NMR}$  (564 MHz,  $\text{CDCl}_3$ )  $\delta$ / ppm = -98.08 – -101.21 (m). **HRMS** (EI) calculated for  $\text{C}_{12}\text{H}_{19}\text{F}^{74}\text{Ge}$ : 256.0677  $[\text{M}]^+$ , found: 256.0687. **IR** (neat):  $\nu/\text{cm}^{-1}$  = 3067 (w), 2949 (s), 2874 (s), 2014 (w), 1914 (w), 1596 (m), 1568 (m), 1435 (s), 1380 (m), 1254 (m), 1203 (s), 1110 (m), 1065 (m), 1015 (s), 968 (m), 855 (w), 816 (s), 755 (s), 701 (s).

**Triethyl(3-fluorophenyl)germane**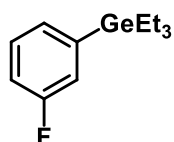

Prepared according to GP 1 by using 1-fluoro-3-iodobenzene. The title product was obtained after purification by column chromatography (hexane) as a colorless liquid (722 mg, 2.82 mmol, 94%).

$R_f$  = 0.82 (pentane).  $^1\text{H NMR}$  (600 MHz,  $\text{CDCl}_3$ )  $\delta$ / ppm = 7.38 – 7.29 (m, 1H), 7.21 (d,  $J$  = 7.2 Hz, 1H), 7.15 (dd,  $J$  = 8.6, 2.7 Hz, 1H), 7.07 – 6.97 (m, 1H), 1.15 – 0.95 (m, 15H).  $^{13}\text{C NMR}$  (151 MHz,  $\text{CDCl}_3$ )  $\delta$ / ppm = 162.8 (d,  $J$  = 249.0 Hz), 143.0 (d,  $J$  = 3.3 Hz), 129.6 (d,  $J$  = 3.1 Hz), 129.5 (d,  $J$  = 6.7 Hz), 120.4 (d,  $J$  = 18.0 Hz), 115.1 (d,  $J$  = 21.0 Hz), 9.0, 4.3.  $^{19}\text{F NMR}$  (564 MHz,  $\text{CDCl}_3$ )  $\delta$ / ppm = -113.9 – -114.0 (m). **HRMS** (EI) calculated for  $\text{C}_{12}\text{H}_{19}\text{F}^{74}\text{Ge}$ : 256.0677  $[\text{M}]^+$ , found:

256.0677. **IR** (neat):  $\nu/\text{cm}^{-1}$  = 3058 (w), 2948 (s), 2330 (w), 2082 (w), 1999 (w), 1924 (w), 1755 (w), 1576 (s), 1470 (s), 1412 (s), 1257 (m), 1211 (s), 1159 (w), 1095 (m), 1014 (s), 967 (s), 862 (s), 781 (s), 693 (s).

### Triethyl(3-chlorophenyl)germane

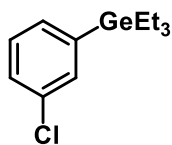

Prepared according to GP 1 by using 1-chloro-3-iodobenzene. The title product was obtained after purification by column chromatography (hexane) as a colorless liquid (726 mg, 2.67 mmol, 89%).

$R_f$  = 0.85 (pentane).  **$^1\text{H NMR}$**  (600 MHz,  $\text{CDCl}_3$ )  $\delta/\text{ppm}$  = 7.42 (d,  $J$  = 2.2 Hz, 1H), 7.35 – 7.25 (m, 3H), 1.15 – 1.05 (m, 9H), 1.05 – 0.97 (m, 6H).  **$^{13}\text{C NMR}$**  (151 MHz,  $\text{CDCl}_3$ )  $\delta/\text{ppm}$  = 142.7, 134.4, 133.7, 132.0, 129.3, 128.3, 9.0, 4.3. **HRMS** (EI) calculated for  $\text{C}_{12}\text{H}_{19}^{35}\text{Cl}^{74}\text{Ge}$ : 272.0382 [M]<sup>+</sup>, found: 272.0387. **IR** (neat):  $\nu/\text{cm}^{-1}$  = 3053 (w), 2948 (s), 2327 (m), 2090 (w), 1997 (w), 1924 (w), 1753 (w), 1558 (m), 1461 (s), 1385 (m), 1237 (w), 1170 (w), 1105 (s), 1014 (s), 966 (m), 881 (w), 774 (s), 694 (s).

### Triethyl(4-chlorophenyl)germane

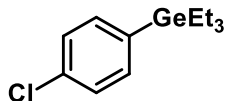

Prepared according to GP 1 by using 1-chloro-4-iodobenzene. The title product was obtained after purification by column chromatography (pentane) as a colorless oil (797 mg, 2.94 mmol, 98%).

$R_f$  = 0.87 (pentane).  **$^1\text{H NMR}$**  (600 MHz,  $\text{CDCl}_3$ )  $\delta/\text{ppm}$  = 7.36 (d,  $J$  = 8.2 Hz, 2H), 7.31 (d,  $J$  = 8.2 Hz, 2H), 1.08 – 1.02 (m, 9H), 1.01 – 0.94 (m, 6H).  **$^{13}\text{C NMR}$**  (151 MHz,  $\text{CDCl}_3$ )  $\delta/\text{ppm}$  = 138.2, 135.4, 134.5, 128.2, 9.0, 4.3. **HRMS** (EI) calculated for  $\text{C}_{12}\text{H}_{19}^{35}\text{Cl}^{74}\text{Ge}$ : 272.0387 [M]<sup>+</sup>, found: 272.0385. **IR** (neat):  $\nu/\text{cm}^{-1}$  = 3070 (w), 2949 (s), 2873 (s), 2332 (w), 2150 (w), 2091 (w), 2030 (w), 1900 (w), 1637 (w), 1572 (m), 1468 (s), 1428 (m), 1378 (m), 1304 (w), 1229 (w), 1075 (s), 1012 (s), 966 (m), 806 (s), 699 (s).

### Triethyl(3-bromophenyl)germane

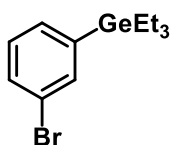

Prepared according to GP 1 by using 1-bromo-3-iodobenzene. The title product was obtained after purification by column chromatography (hexane) as a colorless liquid (910 mg, 2.88 mmol, 96%).

$R_f$  = 0.83 (pentane).  **$^1\text{H NMR}$**  (600 MHz,  $\text{CDCl}_3$ )  $\delta/\text{ppm}$  = 7.55 (d,  $J$  = 1.7 Hz, 1H), 7.48 – 7.43 (m, 1H), 7.36 (d,  $J$  = 7.3 Hz, 1H), 7.25 – 7.18 (m, 1H), 1.14 – 1.04 (m, 9H), 1.04 – 0.97 (m, 6H).  **$^{13}\text{C NMR}$**  (151 MHz,  $\text{CDCl}_3$ )  $\delta/\text{ppm}$  = 143.2, 136.5, 132.4, 131.2, 129.7, 123.1, 9.0, 4.3. **HRMS** (EI)

calculated for  $C_{12}H_{19}^{79}Br^{74}Ge$ : 315.9876  $[M]^+$ , found: 315.9891. **IR** (neat):  $\nu/cm^{-1}$  = 3053 (w), 2946 (s), 2337 (w), 2090 (w), 1759 (w), 1552 (w), 1460 (s), 1382 (m), 1235 (w), 1105 (m), 1064 (m), 1014 (s), 962 (w), 883 (w), 774 (s), 694 (s).

### Triethyl(4-bromophenyl)germane

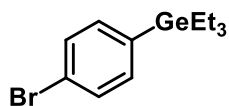

Prepared according to GP 1 by using 1-bromo-4-iodobenzene. The title product was obtained after purification by column chromatography (pentane) as a colorless oil (820 mg, 2.60 mmol, 87%).

$R_f$  = 0.90 (pentane).  $^1H$  NMR (600 MHz,  $CDCl_3$ )  $\delta/ppm$  = 7.47 (d,  $J$  = 8.1 Hz, 2H), 7.29 (d,  $J$  = 8.1 Hz, 2H), 1.09 – 1.01 (m, 9H), 1.01 – 0.94 (m, 6H).  $^{13}C$  NMR (151 MHz,  $CDCl_3$ )  $\delta/ppm$  = 138.8, 135.7, 131.1, 123.0, 9.0, 4.3. **HRMS** (EI) calculated for  $C_{12}H_{19}^{79}Br^{74}Ge$ : 315.9882  $[M]^+$ , found: 315.9867. **IR** (neat):  $\nu/cm^{-1}$  = 3068 (w), 2949 (s), 2872 (s), 2328 (w), 2113 (w), 1993 (w), 1900 (w), 1742 (w), 1633 (w), 1566 (m), 1464 (s), 1427 (m), 1374 (m), 1228 (w), 1061 (m), 1009 (s), 866 (m), 801 (s), 701 (s).

### Triethyl(4-iodophenyl)germane

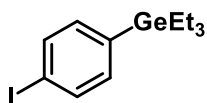

Prepared according to GP 1 by using 1,4-diiodobenzene (990 mg, 3.0 mmol, 1.00 equiv.). The title product was obtained after purification by column chromatography (pentane) as a colorless oil (963 mg, 2.65 mmol, 88%).

$R_f$  = 0.90 (pentane).  $^1H$  NMR (600 MHz,  $CDCl_3$ )  $\delta/ppm$  = 7.67 (d,  $J$  = 8.0 Hz, 2H), 7.16 (d,  $J$  = 8.0 Hz, 2H), 1.09 – 1.01 (m, 9H), 1.01 – 0.93 (m, 6H).  $^{13}C$  NMR (151 MHz,  $CDCl_3$ )  $\delta/ppm$  = 139.4, 137.0, 135.9, 95.0, 9.0, 4.2. **HRMS** (EI) calculated for  $C_{12}H_{19}^{74}Ge^{127}I$ : 363.9738  $[M]^+$ , found: 363.9744. **IR** (neat):  $\nu/cm^{-1}$  = 3060 (w), 2948 (s), 2872 (s), 2734 (w), 2329 (w), 2097 (w), 1900 (w), 1741 (w), 1631 (w), 1561 (m), 1463 (m), 1426 (m), 1372 (m), 1228 (w), 1051 (w), 1041 (s), 966 (m), 797 (s), 696 (s).

### *tert*-Butyldimethyl(4-(triethylgermyl)phenoxy)silane

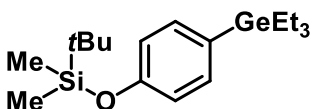

Prepared according to GP 1 by using *tert*-butyl(4-iodophenoxy)dimethylsilane (1.00 g, 3.0 mmol, 1.00 equiv.). The title product was obtained after purification by column chromatography (hexane) as a colorless liquid (1.56 g, 4.23 mmol, 85%).

$R_f$  = 0.65 (pentane).  $^1H$  NMR (400 MHz,  $CDCl_3$ )  $\delta/ppm$  = 7.34 – 7.27 (m, 2H), 6.87 – 6.82 (m, 2H), 1.10 – 1.04 (m, 9H), 1.00 (s, 9H), 0.99 – 0.95 (m, 6H), 0.22 (s, 6H).  $^{13}C$  NMR (101 MHz,  $CDCl_3$ )  $\delta/ppm$  = 155.9, 135.2, 131.1, 119.8, 25.8, 18.3, 9.1, 4.4, -4.2. **HRMS** (ESI) calculated for

*Supporting Information*

$C_{18}H_{34}^{74}GeOSi$ : 391.1488  $[M+Na]^+$ , found: 391.1487. **IR** (neat):  $\nu / \text{cm}^{-1}$  = 2946 (s), 2869 (s), 2328 (w), 2086 (w), 1587 (m), 1495 (m), 1465 (m), 1388 (w), 1258 (s), 1173 (m), 1088 (m), 1013 (m), 913 (s), 828 (s), 781 (s), 695 (m).

## C-H Functionalization of Arenes

### General Procedure 3 (GP 3)

Aryl triethylgermane (1.0 equiv.),  $\text{PhI}(\text{OAc})_2$  (2.0 equiv.), CSA (1.5 equiv.) and  $[(\text{Ph}_3\text{P})\text{AuCl}]$  (5.0 mol%) were dissolved in 1,4-dioxane (0.33 M). Arene (2.0 equiv.) was added and the solution was stirred at 70 °C (reaction time specified for individual compounds). After completion of reaction, the composition was analyzed by  $^1\text{H}$  or  $^{19}\text{F}$  NMR to determine the yield. The reaction mixture was concentrated in *vacuo* and purified by silica gel column chromatography (eluent as specified for individual compounds).

### 3-Bromo-3'-fluoro-4-methoxy-1,1'-biphenyl

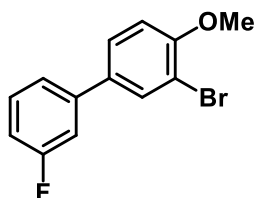

According to GP 3 the C-H functionalization was performed using triethyl(3-fluorophenyl)germane (76.8 mg, 0.300 mmol, 1.0 equiv.) and 2-bromoanisole (74.8  $\mu\text{L}$ , 0.600 mmol, 2.0 equiv.). Reaction time: 5 h. The yield was determined by quantitative  $^{19}\text{F}$  NMR using fluorobenzene as an internal standard (82%; >95% regioselectivity). The title product was purified by column chromatography (hexane/ toluene, 10:1) as a white crystalline solid (61.1 mg, 0.218 mmol, 73%).  $R_f$  = 0.31 (hexane/ toluene, 10:1).  $^1\text{H}$  NMR (400 MHz,  $\text{CDCl}_3$ )  $\delta$ / ppm = 7.77 (d,  $J$  = 2.3 Hz, 1H), 7.48 (dd,  $J$  = 8.5, 2.3 Hz, 1H), 7.43 – 7.32 (m, 1H), 7.34 – 7.26 (m, 1H), 7.26 – 7.17 (m, 1H), 7.07 – 6.97 (m, 1H), 6.97 (d,  $J$  = 8.5 Hz, 1H), 3.94 (s, 3H).  $^{13}\text{C}$  NMR (101 MHz,  $\text{CDCl}_3$ )  $\delta$ / ppm = 163.3 (d,  $J$  = 245.7 Hz), 155.8, 141.8 (d,  $J$  = 7.6 Hz), 133.9 (d,  $J$  = 1.9 Hz), 132.0 130.4 (d,  $J$  = 8.3 Hz), 127.2, 122.5 (d,  $J$  = 2.9 Hz), 114.1 (d,  $J$  = 21.2 Hz), 113.7 (d,  $J$  = 22.1 Hz), 112.3, 112.2, 56.5.  $^{19}\text{F}$  NMR (376 MHz,  $\text{CDCl}_3$ )  $\delta$ / ppm = -112.83 – -112.97 (m). HRMS (EI) calculated for  $\text{C}_{13}\text{H}_{10}\text{OF}^{79}\text{Br}$ : 279.9893 [M]<sup>+</sup>, found: 279.9887.

### 3-Bromo-3'-chloro-4-methoxy-1,1'-biphenyl

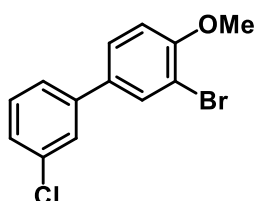

According to GP 3 the C-H functionalization was performed using triethyl(3-chlorophenyl)germane (81.6 mg, 0.300 mmol, 1.0 equiv.) and 2-bromoanisole (74.8  $\mu\text{L}$ , 0.600 mmol, 2.0 equiv.). Reaction time: 5 h. The yield was determined by quantitative  $^1\text{H}$  NMR using 1,3,5-tris(trifluoromethyl)benzene as an internal standard (86%; >95% regioselectivity). The title product was purified by column chromatography (hexane/toluene, 10:1) as a viscous liquid (68.1 mg, 0.230 mmol, 77%).

$R_f = 0.30$  (hexane/ toluene, 10:1).  $^1\text{H NMR}$  (600 MHz,  $\text{CDCl}_3$ )  $\delta$ / ppm = 7.76 – 7.75 (m, 1H), 7.51 – 7.49 (m, 1H), 7.46 (dd,  $J = 8.5, 2.3$  Hz, 1H), 7.40 – 7.38 (m, 1H), 7.4 – 7.3 (m, 1H), 7.31 – 7.28 (m, 1H), 6.96 (d,  $J = 8.5$  Hz, 1H), 3.94 (s, 3H).  $^{13}\text{C NMR}$  (151 MHz,  $\text{CDCl}_3$ )  $\delta$ / ppm = 155.8, 141.3, 134.8, 133.7, 132.0, 130.2, 127.3, 127.2, 126.9, 125.0, 112.3, 112.2, 56.5. **HRMS** (EI) calculated for  $\text{C}_{13}\text{H}_{10}\text{O}^{79}\text{Br}^{35}\text{Cl}$ : 295.9598  $[\text{M}]^+$ , found: 295.9600.

### 1-(4'-Fluoro-4-methoxy-[1,1'-biphenyl]-3-yl)ethan-1-one

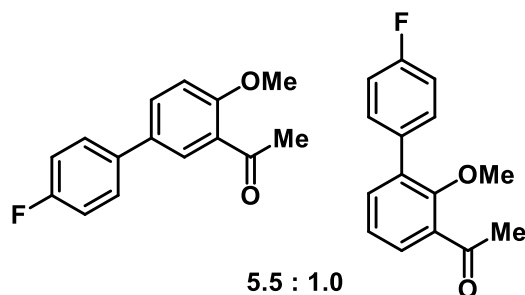

According to GP 3 the C–H functionalization was performed using triethyl(4-fluorophenyl)germane (76.8 mg, 0.300 mmol, 1.0 equiv.) and 1-(2-methoxyphenyl)ethan-1-one (82.7  $\mu\text{L}$ , 0.600 mmol, 2.0 equiv.). Reaction time: 5 h. The yield was determined by quantitative

$^{19}\text{F NMR}$  using fluorobenzene as an internal standard (68%; 5.5:1 ratio of *para:ortho* isomer). The title product was purified by column chromatography (hexane/ EtOAc, 10:1) to give a mixture of both regioisomers as a viscous liquid (44.7 mg, 0.183 mmol, 61%).

*Characterization data for 1-(4'-fluoro-4-methoxy-[1,1'-biphenyl]-3-yl)ethan-1-one:*

$R_f = 0.24$  (hexane/ EtOAc, 10:1).  $^1\text{H NMR}$  (400 MHz,  $\text{CDCl}_3$ )  $\delta$ / ppm = 7.93 (d,  $J = 2.5$  Hz, 1H), 7.64 (dd,  $J = 8.6, 2.5$  Hz, 1H), 7.56 – 7.46 (m, 3H), 7.15 – 7.05 (m, 2H), 7.03 (d,  $J = 8.6$  Hz, 1H), 3.95 (s, 3H), 2.65 (s, 3H).  $^{13}\text{C NMR}$  (101 MHz,  $\text{CDCl}_3$ )  $\delta$ / ppm = 199.8, 162.4 (d,  $J = 246.2$  Hz), 158.5, 136.1 (d,  $J = 3.3$  Hz), 132.8, 132.0, 128.9, 128.5, 128.4 (d,  $J = 8.1$  Hz), 115.8 (d,  $J = 21.2$  Hz), 112.3, 55.8, 32.0.  $^{19}\text{F NMR}$  (376 MHz,  $\text{CDCl}_3$ )  $\delta$ / ppm = -115.90 – -116.09 (m). **HRMS** (EI) calculated for  $\text{C}_{15}\text{H}_{13}\text{O}_2\text{F}$ : 267.0792  $[\text{M}+\text{Na}]^+$ , found: 267.0793.

### *tert*-Butyldimethyl((2',4',6'-trimethyl-[1,1'-biphenyl]-4-yl)oxy)silane

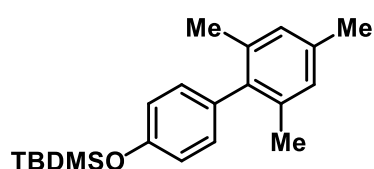

According to GP 3 the C–H functionalization was performed using *tert*-butyldimethyl(4-(triethylgermyl)phenoxy)silane (110.4 mg, 0.300 mmol, 1.0 equiv.) and mesitylene (83.1  $\mu\text{L}$ , 0.600 mmol, 2.0 equiv.). Reaction time: 5 h.

The yield was determined by quantitative  $^1\text{H NMR}$  using 1,3,5-tris(trifluoromethyl)benzene as an internal standard (88%). The reaction was quenched by addition of aqueous solution of  $\text{NH}_4\text{Cl}$  (sat.), the organic phase was separated and the aqueous phase was extracted with DCM (3x). The combined organic phases were dried with  $\text{MgSO}_4$  and the solvent was removed



under reduced pressure. The title product was purified by column chromatography (hexane/ toluene, 10:1) as a viscous liquid (73.4 mg, 0.225 mmol, 75%).

$R_f$  = 0.57 (hexane/ toluene, 10:1).  $^1\text{H NMR}$  (600 MHz,  $\text{CDCl}_3$ )  $\delta$ / ppm = 6.98 (d,  $J$  = 8.6 Hz, 2H), 6.94 (s, 2H), 6.89 (d,  $J$  = 8.5 Hz, 2H), 2.33 (s, 3H), 2.01 (s, 6H), 1.02 (s, 9H), 0.24 (s, 6H).  $^{13}\text{C NMR}$  (151 MHz,  $\text{CDCl}_3$ )  $\delta$ / ppm = 154.3, 139.0, 136.5, 136.5, 134.0, 130.4, 128.1, 120.0, 25.8, 21.2, 20.9, 18.4, -4.2. **HRMS** (EI) calculated for  $\text{C}_{21}\text{H}_{30}\text{OSi}$ : 326.2060  $[\text{M}]^+$ , found: 326.2070.

### 2-(4-fluorophenyl)-9,9-dimethyl-9H-xanthene

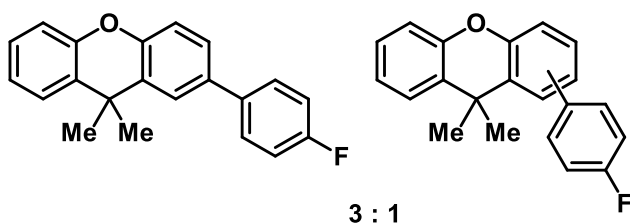

According to GP 3 the C-H functionalization was performed using triethyl(4-fluorophenyl)germane (76.8 mg, 0.300 mmol, 1.0 equiv.) and 9,9-dimethyl-9H-xanthene (126.2 mg, 0.600 mmol, 2.0 equiv.).

Reaction time: 5 h. The yield was determined by quantitative  $^{19}\text{F}$  NMR using fluorobenzene as an internal standard (66%; 3:1 ratio of isomers). The title product was purified by column chromatography (hexane/ toluene, 10:1) to give a mixture of both regioisomers as a colorless viscous liquid (53.9 mg, 0.177 mmol, 59%).

*Characterization data for both isomers:*

$R_f$  = 0.46 (hexane/ toluene, 10:1).  $^1\text{H NMR}$  (600 MHz,  $\text{CDCl}_3$ )  $\delta$ / ppm = 7.64 – 7.58 (m, 1H), 7.59 (d,  $J$  = 2.2 Hz, 1H), 7.57 – 7.53 (m, 2H), 7.50 – 7.43 (m, 2H), 7.40 (dd,  $J$  = 8.3, 2.2 Hz, 1H), 7.27 – 7.22 (m, 1H), 7.24 – 7.08 (m, 8H), 6.99 (dd,  $J$  = 8.1, 1.3 Hz, 0.35H), 1.72 (s, 6H), 1.70 (s, 3H).  $^{13}\text{C NMR}$  (151 MHz,  $\text{CDCl}_3$ )  $\delta$ / ppm = 162.4 (d,  $J$  = 245.8 Hz), 162.3 (d,  $J$  = 246.0 Hz), 150.7, 150.4, 150.1, 147.7, 137.3 (d,  $J$  = 3.1 Hz), 135.4, 134.1 (d,  $J$  = 3.7 Hz), 131.5 (d,  $J$  = 7.7 Hz), 131.3, 130.5, 130.5, 129.9, 128.9, 128.8, 128.5 (d,  $J$  = 8.1 Hz), 127.6, 127.4, 126.3 (d,  $J$  = 5.6 Hz), 125.9, 125.4, 125.0, 123.4, 123.3, 123.1, 116.9, 116.5, 116.5, 115.7 (d,  $J$  = 21.5 Hz), 115.0 (d,  $J$  = 21.2 Hz), 34.6, 34.3, 32.7, 32.0.  $^{19}\text{F NMR}$  (564 MHz,  $\text{CDCl}_3$ )  $\delta$ / ppm = -115.57 – -115.72 (m), -116.15 – -116.30 (m). **HRMS** (EI) calculated for  $\text{C}_{21}\text{H}_{17}\text{OF}$ : 304.1258  $[\text{M}]^+$ , found: 304.1271.

**4-(4-Bromophenyl)-2-chloro-5-(4-fluorophenyl)thiazole**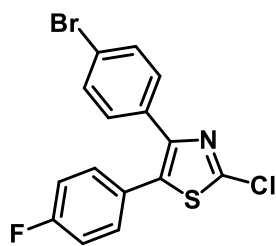

According to GP 3 the C–H functionalization was performed using triethyl(4-fluorophenyl)germane (76.8 mg, 0.300 mmol, 1.0 equiv.) and 4-(4-bromophenyl)-2-chlorothiazole (81.6 mg, 0.600 mmol, 2.0 equiv.). Reaction time: 16 h. The yield was determined by quantitative  $^{19}\text{F}$  NMR using fluorobenzene as an internal standard (80%). The title product was purified by column chromatography (hexane/ toluene, 10:1) as a red viscous liquid (74.0 mg, 0.201 mmol, 67%).

$R_f$  = 0.22 (hexane/ toluene, 10:1).  $^1\text{H}$  NMR (600 MHz,  $\text{CDCl}_3$ )  $\delta$ / ppm = 7.41 (d,  $J$  = 8.5 Hz, 2H), 7.33 (d,  $J$  = 8.6 Hz, 2H), 7.29 (dd,  $J$  = 8.7, 5.3 Hz, 2H), 7.09 – 7.03 (m, 2H).  $^{13}\text{C}$  NMR (151 MHz,  $\text{CDCl}_3$ )  $\delta$ / ppm = 163.1 (d,  $J$  = 250.3 Hz), 149.9, 147.7, 134.0, 132.4, 131.8, 131.6 (d,  $J$  = 8.4 Hz), 130.5, 126.6 (d,  $J$  = 3.5 Hz), 122.7, 116.5 (d,  $J$  = 21.9 Hz).  $^{19}\text{F}$  NMR (564 MHz,  $\text{CDCl}_3$ )  $\delta$ / ppm = -111.29 – -111.36 (m). HRMS (EI) calculated for  $\text{C}_{15}\text{H}_8^{79}\text{Br}^{35}\text{ClFNS}$ : 367.9306  $[\text{M}+\text{H}]^+$ , found: 367.9305.

**4'-Fluoro-2,4,6-trimethyl-1,1'-biphenyl**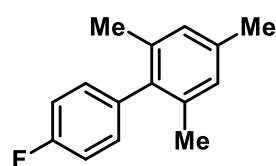

According to GP 3 the C–H functionalization was performed using triethyl(4-fluorophenyl)germane (76.8 mg, 0.300 mmol, 1.0 equiv.) and mesitylene (83.1  $\mu\text{L}$ , 0.600 mmol, 2.0 equiv.). Reaction time: 2 h. The yield was determined by quantitative  $^{19}\text{F}$  NMR using fluorobenzene as an internal standard (90%). The title product was purified by column chromatography (hexane) as a white solid (48.7 mg, 0.227 mmol, 76%).

$R_f$  = 0.49 (hexane).  $^1\text{H}$  NMR (600 MHz,  $\text{CDCl}_3$ )  $\delta$ / ppm = 7.12 (d,  $J$  = 1.9 Hz, 2H), 7.11 (s, 2H), 6.96 (br s, 2H), 2.35 (s, 3H), 2.01 (s, 6H).  $^{13}\text{C}$  NMR (151 MHz,  $\text{CDCl}_3$ )  $\delta$ / ppm = 161.81 (d,  $J$  = 244.5 Hz), 138.1, 137.0 (d,  $J$  = 3.3 Hz), 136.9, 136.3, 130.9 (d,  $J$  = 8.0 Hz), 128.2, 115.5 (d,  $J$  = 21.1 Hz), 21.2, 20.9.  $^{19}\text{F}$  NMR (376 MHz,  $\text{CDCl}_3$ )  $\delta$ / ppm = -116.50 (p,  $J$  = 7.3 Hz). HRMS (EI) calculated for  $\text{C}_{15}\text{H}_{15}\text{F}$ : 214.1152  $[\text{M}]^+$ , found: 214.1147.

These data are in agreement with those reported previously in the literature.<sup>4</sup>

**4'-Fluoro-2,3,5,6-tetramethyl-1,1'-biphenyl**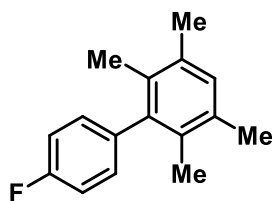

According to GP 3 the C–H functionalization was performed using triethyl(4-fluorophenyl)germane (76.8 mg, 0.300 mmol, 1.0 equiv.) and 1,2,4,5-tetramethylbenzene (80.5 mg, 0.600 mmol, 2.0 equiv.). Reaction time: 5 h. The yield of mono- and bis-arylated product was determined by quantitative  $^{19}\text{F}$  NMR using fluorobenzene as an internal standard (*monoarylated*: 61%; *bis-arylated*: 9%). The title product was purified by column chromatography (hexane) as a white solid (54%) in a mixture with inseparable starting material triethyl(4-fluorophenyl)germane (5%).

$R_f$  = 0.52 (hexane).  $^1\text{H NMR}$  (600 MHz,  $\text{CDCl}_3$ )  $\delta$ / ppm = 7.15 – 7.04 (m, 4H), 7.01 (s, 1H), 2.27 (s, 6H), 1.88 (s, 6H)  $^{13}\text{C NMR}$  (151 MHz,  $\text{CDCl}_3$ )  $\delta$ / ppm = 161.7 (d,  $J$  = 244.6 Hz), 141.1, 138.3 (d,  $J$  = 3.3 Hz), 133.7, 132.3, 131.0 (d,  $J$  = 7.5 Hz), 130.7, 115.3 (d,  $J$  = 21.1 Hz), 20.4, 17.3.  $^{19}\text{F NMR}$  (564 MHz,  $\text{CDCl}_3$ )  $\delta$ / ppm = -116.68 – -116.75 (m). **HRMS** (EI) calculated for  $\text{C}_{16}\text{H}_{17}\text{F}$ : 228.1308  $[\text{M}]^+$ , found: 228.1305.

These data are in agreement with those reported previously in the literature.<sup>4</sup>

**4'-Fluoro-2,5-dimethyl-1,1'-biphenyl**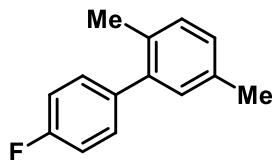

According to GP 3 the C–H functionalization was performed using triethyl(4-fluorophenyl)germane (76.8 mg, 0.300 mmol, 1.0 equiv.) and 1,4-dimethylbenzene (74.0  $\mu\text{L}$ , 0.600 mmol, 2.0 equiv.). Reaction time: 2 h.

The yield of mono- and bis-arylated product was determined by quantitative  $^{19}\text{F}$  NMR using fluorobenzene as an internal standard (*monoarylated*: 59%; *bis-arylated*: 15%). The title product (monarylated) was purified by column chromatography (hexane) followed by preparative HPLC (hexane/ EtOAc, 97:3) as a viscous liquid (27.5 mg, 0.138 mmol, 46%).

$R_f$  = 0.48 (hexane).  $^1\text{H NMR}$  (400 MHz,  $\text{CDCl}_3$ )  $\delta$ / ppm = 7.27 (dd,  $J$  = 8.7, 5.5 Hz, 2H), 7.16 (d,  $J$  = 7.7 Hz, 1H), 7.12 – 7.06 (m, 3H), 7.03 (d,  $J$  = 1.8 Hz, 1H), 2.35 (s, 3H), 2.21 (s, 3H).  $^{13}\text{C NMR}$  (151 MHz,  $\text{CDCl}_3$ )  $\delta$ / ppm = 162.0 (d,  $J$  = 245.1 Hz), 140.9, 138.1 (d,  $J$  = 3.4 Hz), 135.4, 132.3, 130.8 (d,  $J$  = 7.5 Hz), 130.7, 130.4, 128.2, 115.0 (d,  $J$  = 21.1 Hz), 21.1, 20.1.  $^{19}\text{F NMR}$  (564 MHz,  $\text{CDCl}_3$ )  $\delta$ / ppm = -116.28 – -116.40 (m). **HRMS** (EI) calculated for  $\text{C}_{14}\text{H}_{13}\text{F}$ : 200.0995  $[\text{M}]^+$ , found: 200.0992.

These data are in agreement with those reported previously in the literature.<sup>4</sup>

**4'-Fluoro-3,4-dimethyl-1,1'-biphenyl**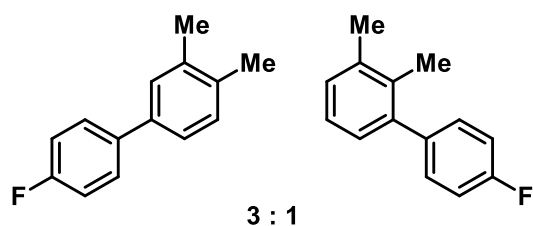

According to GP 3 the C–H functionalization was performed using triethyl(4-fluorophenyl)germane (76.8 mg, 0.300 mmol, 1.0 equiv.) and 1,2-dimethylbenzene (72.5  $\mu$ L, 0.600 mmol, 2.0 equiv.). Reaction time: 5 h. The

yield was determined by quantitative  $^{19}\text{F}$  NMR using fluorobenzene as an internal standard (73%; 3:1 ratio of *meta:ortho* isomers). The title product was purified by column chromatography (hexane) to give a mixture of both regioisomers as a viscous liquid (35.1 mg, 0.175 mmol, 58%).

*Characterization data for major regioisomer (4'-fluoro-3,4-dimethyl-1,1'-biphenyl):*

$R_f$  = 0.45 (hexane).  $^1\text{H NMR}$  (600 MHz,  $\text{CDCl}_3$ )  $\delta$ / ppm = 7.52 (dd,  $J$  = 8.7, 5.4 Hz, 2H), 7.32 (d,  $J$  = 2.0 Hz, 1H), 7.28 (dd,  $J$  = 7.8, 2.0 Hz, 1H), 7.20 (d,  $J$  = 7.7 Hz, 1H), 7.13 – 7.07 (m, 2H), 2.33 (s, 3H), 2.30 (s, 3H).  $^{13}\text{C NMR}$  (151 MHz,  $\text{CDCl}_3$ )  $\delta$ / ppm = 162.4 (d,  $J$  = 245.5 Hz), 138.0, 137.5 (d,  $J$  = 3.0 Hz), 137.1, 135.9, 130.2, 128.6 (d,  $J$  = 7.9 Hz), 128.4, 124.5, 115.6 (d,  $J$  = 21.3 Hz), 20.1, 19.6.  $^{19}\text{F NMR}$  (564 MHz,  $\text{CDCl}_3$ )  $\delta$ / ppm = -116.4 – -116.6 (m). **HRMS** (EI) calculated for  $\text{C}_{14}\text{H}_{13}\text{F}$ : 200.0995 [M] $^+$ , found: 200.0991.

These data are in agreement with those reported previously in the literature.<sup>4</sup>

**4-Fluoro-4'-methoxy-1,1'-biphenyl**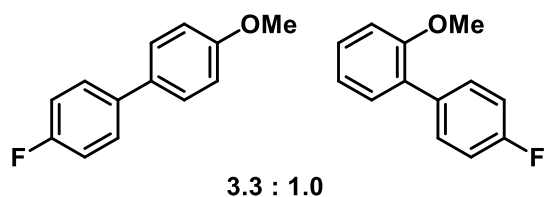

According to GP 3 the C–H functionalization was performed using triethyl(4-fluorophenyl)germane (76.8 mg, 0.300 mmol, 1.0 equiv.) and methoxybenzene (65.2  $\mu$ L, 0.600 mmol, 2.0 equiv.). Reaction time: 5 h. The yield was determined by quantitative  $^{19}\text{F}$  NMR

using fluorobenzene as an internal standard (*monoarylated*: 63%; 3.3:1 ratio of *para:ortho* isomers; *bis-arylated*: 6%). The title product was purified by column chromatography (hexane/toluene, 10:1) as a white solid (33.3 mg, 0.165 mmol, 55%).

*Characterization data for major regioisomer (4-fluoro-4'-methoxy-1,1'-biphenyl):*

$R_f$  = 0.42 (hexane/ toluene, 10:1).  $^1\text{H NMR}$  (600 MHz,  $\text{CDCl}_3$ )  $\delta$ / ppm = 7.52 – 7.45 (m, 4H), 7.15 – 7.08 (m, 2H), 6.98 (d,  $J$  = 8.7 Hz, 2H), 3.85 (s, 3H).  $^{13}\text{C NMR}$  (151 MHz,  $\text{CDCl}_3$ )  $\delta$ / ppm = 162.2 (d,  $J$  = 245.7 Hz), 159.2, 137.1 (d,  $J$  = 3.3 Hz), 133.0, 128.3 (d,  $J$  = 7.5 Hz), 128.2, 115.7 (d,  $J$  = 21.4 Hz), 114.4, 55.5.  $^{19}\text{F NMR}$  (564 MHz,  $\text{CDCl}_3$ )  $\delta$ / ppm = -116.72 – -116.79 (m). **HRMS** (EI) calculated for  $\text{C}_{13}\text{H}_{11}\text{O}_1\text{F}$ : 202.0788 [M] $^+$ , found: 202.0786.

These data are in agreement with those reported previously in the literature.<sup>4</sup>

**2,4,6-Trimethyl-4'-(trifluoromethyl)-1,1'-biphenyl**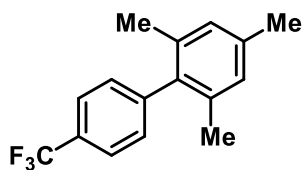

According to GP 3 the C–H functionalization was performed using triethyl(4-(trifluoromethyl)phenyl)germane (91.8 mg, 0.300 mmol, 1.0 equiv.) and mesitylene (83.1  $\mu$ L, 0.600 mmol, 2.0 equiv.). Reaction time: 5 h. The yield was determined by quantitative  $^{19}\text{F}$  NMR using fluorobenzene as an internal standard (87%). The title product was purified by column chromatography (hexane) as a white solid (63.4 mg, 0.240 mmol, 80%).

$R_f$  = 0.67 (hexane).  $^1\text{H}$  NMR (600 MHz,  $\text{CDCl}_3$ )  $\delta$ / ppm = 7.70 (d,  $J$  = 7.9 Hz, 2H), 7.29 (d,  $J$  = 7.9 Hz, 2H), 6.98 (s, 2H), 2.37 (s, 3H), 2.01 (s, 6H).  $^{13}\text{C}$  NMR (151 MHz,  $\text{CDCl}_3$ )  $\delta$ / ppm = 145.2, 137.8, 137.4, 135.8, 129.9, 129.0 (q,  $J$  = 32.2 Hz), 128.4, 125.5 (q,  $J$  = 3.8 Hz), 124.5 (q,  $J$  = 271.9 Hz), 21.2, 20.8.  $^{19}\text{F}$  NMR (564 MHz,  $\text{CDCl}_3$ )  $\delta$ / ppm = -62.35. HRMS (EI) calculated for  $\text{C}_{16}\text{H}_{15}\text{F}_3$ : 264.1120  $[\text{M}]^+$ , found: 264.1116.

These data are in agreement with those reported previously in the literature.<sup>5</sup>

Repeating the reaction under air yielded the desired product in 85% (determined by quantitative  $^{19}\text{F}$  NMR using fluorobenzene as an internal standard).

**3'-Bromo-2-fluoro-4'-methoxy-1,1'-biphenyl**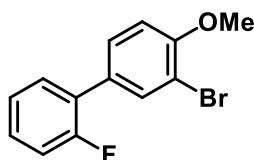

According to GP 3 the C–H functionalization was performed using triethyl(2-fluorophenyl)germane (76.8 mg, 0.300 mmol, 1.0 equiv.) and 2-bromoanisole (74.8  $\mu$ L, 0.600 mmol, 2.0 equiv.). Reaction time: 5 h. The yield was determined by quantitative  $^{19}\text{F}$  NMR using fluorobenzene as an internal standard (65%; >95% regioselectivity). The title product was purified by column chromatography (hexane/ toluene, 10:1) as a viscous liquid (49.0 mg, 0.173 mmol, 58%).

$R_f$  = 0.34 (hexane/ toluene, 10:1).  $^1\text{H}$  NMR (400 MHz,  $\text{CDCl}_3$ )  $\delta$ / ppm = 7.76 (dd,  $J$  = 2.3, 1.3 Hz, 1H), 7.52 – 7.45 (m, 1H), 7.43 – 7.36 (m, 1H), 7.35 – 7.27 (m, 1H), 7.22 – 7.17 (m, 1H), 7.17 – 7.11 (m, 1H), 6.98 (d,  $J$  = 8.5 Hz, 1H), 3.94 (s, 3H).  $^{13}\text{C}$  NMR (101 MHz,  $\text{CDCl}_3$ )  $\delta$ / ppm = 159.8 (d,  $J$  = 247.5 Hz), 155.6, 133.8 (d,  $J$  = 2.9 Hz), 130.5 (d,  $J$  = 3.3 Hz), 129.7, 129.3 (d,  $J$  = 3.5 Hz), 129.1 (d,  $J$  = 8.2 Hz), 127.5 (d,  $J$  = 13.2 Hz), 124.6 (d,  $J$  = 3.5 Hz), 116.3 (d,  $J$  = 22.7 Hz), 111.9, 111.8, 56.5.  $^{19}\text{F}$  NMR (376 MHz,  $\text{CDCl}_3$ )  $\delta$ / ppm = -118.07. MS (70 eV, EI):  $m/z$  (%): 282.9 (11), 282.0 (84), 280.9 (12), 280.0 (86)  $[\text{M}]^+$ , 266.9 (42), 264.9 (42), 238.9 (47), 236.9 (48), 186.0 (21), 171.0 (16), 170.0 (59), 169.0 (12), 158.0 (38), 157.0 (100), 138.0 (15), 133.0 (15), 132.0 (12), 131.0 (16), 120.0 (12), 107.0 (11), 75.0 (12), 74.0 (13), 63.0 (11), 62.0 (10).

These data are in agreement with those reported previously in the literature.<sup>4</sup>

**3-Bromo-4'-fluoro-4-methoxy-1,1'-biphenyl**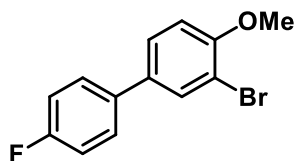

According to GP 3 the C-H functionalization was performed using triethyl(4-fluorophenyl)germane (76.8 mg, 0.300 mmol, 1.0 equiv.) and 2-bromoanisole (74.8  $\mu$ L, 0.600 mmol, 2.0 equiv.). Reaction time: 2 h. The yield was determined by quantitative  $^{19}\text{F}$  NMR using fluorobenzene as an internal standard (83%; >95% regioselectivity). The title product was purified by column chromatography (hexane/ toluene, 10:1) as a viscous liquid (64.1 mg, 0.229 mmol, 76%).

$R_f$  = 0.31 (hexane/ toluene, 10:1).  $^1\text{H}$  NMR (600 MHz,  $\text{CDCl}_3$ )  $\delta$ / ppm = 7.73 (d,  $J$  = 2.3 Hz, 1H), 7.49 – 7.44 (m, 2H), 7.43 (dd,  $J$  = 8.5, 2.3 Hz, 1H), 7.13 – 7.08 (m, 2H), 6.95 (d,  $J$  = 8.5 Hz, 1H), 3.93 (s, 3H).  $^{13}\text{C}$  NMR (151 MHz,  $\text{CDCl}_3$ )  $\delta$ / ppm = 162.4 (d,  $J$  = 246.1 Hz), 155.4, 135.7 (d,  $J$  = 3.0 Hz), 134.3, 131.9, 128.4 (d,  $J$  = 7.9 Hz), 127.0, 115.8 (d,  $J$  = 21.6 Hz), 112.2, 112.2, 56.4.  $^{19}\text{F}$  NMR (376 MHz,  $\text{CDCl}_3$ )  $\delta$ / ppm = -115.64 – -115.76 (m). HRMS (EI) calculated for  $\text{C}_{13}\text{H}_{10}\text{OF}^{79}\text{Br}$ : 279.9893 [M] $^+$ , found: 279.9891.

These data are in agreement with those reported previously in the literature.<sup>4</sup>

**3-Chloro-4'-fluoro-4-methoxy-1,1'-biphenyl**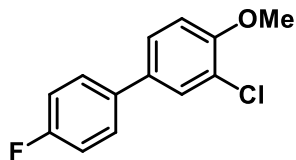

According to GP 3 the C-H functionalization was performed using triethyl(4-fluorophenyl)germane (76.8 mg, 0.300 mmol, 1.0 equiv.) and 2-chloroanisole (76.2  $\mu$ L, 0.600 mmol, 2.0 equiv.). Reaction time: 5 h. The yield was determined by quantitative  $^{19}\text{F}$  NMR using fluorobenzene as an internal standard (85%; >95% regioselectivity). The title product was purified by column chromatography (hexane/toluene, 10:1) as a viscous liquid (55.1 mg, 0.233 mmol, 78%; >95% isomeric purity;  $^1\text{H}$  and  $^{19}\text{F}$  NMR analysis).

$R_f$  = 0.35 (hexane/ toluene, 10:1).  $^1\text{H}$  NMR (600 MHz,  $\text{CDCl}_3$ )  $\delta$ / ppm = 7.56 (d,  $J$  = 2.3 Hz, 1H), 7.49 – 7.45 (m, 2H), 7.38 (dd,  $J$  = 8.5, 2.3 Hz, 1H), 7.13 – 7.08 (m, 2H), 6.98 (d,  $J$  = 8.5 Hz, 1H), 3.93 (s, 3H).  $^{13}\text{C}$  NMR (151 MHz,  $\text{CDCl}_3$ )  $\delta$ / ppm = 162.4 (d,  $J$  = 246.1 Hz), 154.5, 135.8 (d,  $J$  = 3.6 Hz), 133.8, 128.8, 128.4 (d,  $J$  = 8.1 Hz), 126.2, 122.9, 115.8 (d,  $J$  = 21.5 Hz), 112.4, 56.3.  $^{19}\text{F}$  NMR (376 MHz,  $\text{CDCl}_3$ )  $\delta$ / ppm = -115.66 – -115.78 (m). HRMS (EI) calculated for  $\text{C}_{13}\text{H}_{10}\text{OF}^{35}\text{Cl}$ : 236.0399 [M] $^+$ , found: 236.0399.

These data are in agreement with those reported previously in the literature.<sup>4</sup>

**3-Iodo-4'-fluoro-4-methoxy-1,1'-biphenyl**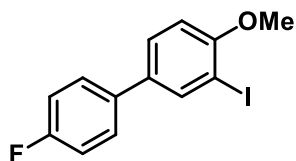

According to GP 3 the C-H functionalization was performed using triethyl(4-fluorophenyl)germane (76.8 mg, 0.300 mmol, 1.0 equiv.) and 2-iodoanisole (78.4  $\mu$ L, 0.600 mmol, 2.0 equiv.). Reaction time: 5 h.

The yield was determined by quantitative  $^{19}\text{F}$  NMR using fluorobenzene as an internal standard (83%, >95% regioselectivity). The title product was purified by column chromatography (hexane/ toluene, 10:1) as a viscous liquid (73.8 mg, 0.225 mmol, 75%).

$R_f$  = 0.31 (hexane/ toluene, 10:1).  $^1\text{H}$  NMR (600 MHz,  $\text{CDCl}_3$ )  $\delta$ / ppm = 7.96 (d,  $J$  = 2.3 Hz, 1H), 7.50 – 7.42 (m, 3H), 7.16 – 7.07 (m, 2H), 6.87 (d,  $J$  = 8.5 Hz, 1H), 3.91 (s, 3H).  $^{13}\text{C}$  NMR (151 MHz,  $\text{CDCl}_3$ )  $\delta$ / ppm = 162.4 (d,  $J$  = 246.7 Hz), 157.6, 138.0, 135.5 (d,  $J$  = 3.6 Hz), 134.9, 128.4 (d,  $J$  = 8.1 Hz), 128.1, 115.8 (d,  $J$  = 21.5 Hz), 111.1, 86.5, 56.6.  $^{19}\text{F}$  NMR (376 MHz,  $\text{CDCl}_3$ )  $\delta$ / ppm = -115.70 – -115.81 (m). HRMS (EI) calculated for  $\text{C}_{13}\text{H}_{10}\text{OF}^{127}\text{I}$ : 327.9755 [M] $^+$ , found: 327.9756.

These data are in agreement with those reported previously in the literature.<sup>4</sup>

**3-Bromo-4'-iodo-4-methoxy-1,1'-biphenyl**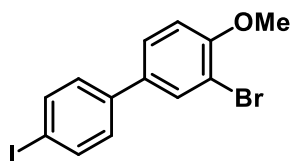

According to GP 3 the C-H functionalization was performed using triethyl(4-iodophenyl)germane (109.2 mg, 0.300 mmol, 1.0 equiv.) and 2-bromoanisole (74.8  $\mu$ L, 0.600 mmol, 2.0 equiv.). Reaction time: 5 h.

The yield was determined by quantitative  $^1\text{H}$  NMR using 1,3,5-tris(trifluoromethyl)benzene as an internal standard (87%; >95% regioselectivity). After analysis, the title product was purified by column chromatography (hexane/ toluene, 10:1) as a white solid (88.4 mg, 0.228 mmol, 76%).

$R_f$  = 0.38 (hexane/ toluene, 10:1).  $^1\text{H}$  NMR (600 MHz,  $\text{CDCl}_3$ )  $\delta$ / ppm = 7.83 – 7.66 (m, 3H), 7.45 (dd,  $J$  = 8.5, 2.3 Hz, 1H), 7.26 (d,  $J$  = 8.5 Hz, 2H), 6.96 (d,  $J$  = 8.5 Hz, 1H), 3.94 (s, 3H).  $^{13}\text{C}$  NMR (151 MHz,  $\text{CDCl}_3$ )  $\delta$ / ppm = 155.7, 139.1, 138.0, 134.0, 131.8, 128.7, 127.0, 112.3, 112.3, 93.0, 56.5. HRMS (EI) calculated for  $\text{C}_{13}\text{H}_{10}\text{O}^{79}\text{Br}^{127}\text{I}$ : 387.8954 [M] $^+$ , found: 387.8960.

These data are in agreement with those reported previously in the literature.<sup>4</sup>

**3,3'-Dibromo-4-methoxy-1,1'-biphenyl**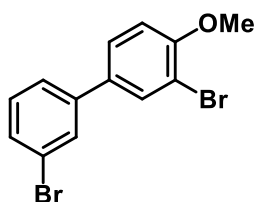

According to GP 3 the C-H functionalization was performed using triethyl(3-bromophenyl)germane (94.8 mg, 0.300 mmol, 1.0 equiv.) and 2-bromoanisole (74.8  $\mu$ L, 0.600 mmol, 2.0 equiv.). Reaction time: 5 h. The

yield was determined by quantitative  $^1\text{H}$  NMR using 1,3,5-tris(trifluoromethyl)benzene as an internal standard (90%; >95% regioselectivity). The title

product was purified by column chromatography (hexane/ toluene, 10:1) as a white solid (85.7 mg, 0.252 mmol, 84%).

$R_f$  = 0.31 (hexane/ toluene, 10:1).  $^1\text{H NMR}$  (600 MHz,  $\text{CDCl}_3$ )  $\delta$ / ppm = 7.75 (d,  $J$  = 2.3 Hz, 1H), 7.66 (dd,  $J$  = 1.9, 1.9 Hz, 1H), 7.49 – 7.41 (m, 3H), 7.28 (dd,  $J$  = 1.9, 1.9 Hz, 1H), 6.96 (d,  $J$  = 8.5 Hz, 1H), 3.94 (s, 3H).  $^{13}\text{C NMR}$  (151 MHz,  $\text{CDCl}_3$ )  $\delta$ / ppm = 155.9, 141.7, 133.7, 132.0, 130.5, 130.3, 129.9, 127.2, 125.5, 123.1, 112.3, 112.2, 56.5. **HRMS** (EI) calculated for  $\text{C}_{13}\text{H}_{10}\text{O}^{79}\text{Br}_2$ : 339.9111  $[\text{M}]^+$ , found: 339.9107.

These data are in agreement with those reported previously in the literature.<sup>4</sup>

### 3,4'-Dibromo-4-methoxy-1,1'-biphenyl

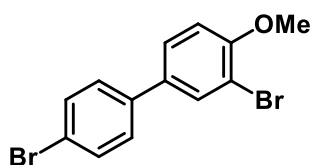

According to GP 3 the C–H functionalization was performed using triethyl(4-bromophenyl)germane (94.8 mg, 0.300 mmol, 1.0 equiv.) and 2-bromoanisole (74.8  $\mu\text{L}$ , 0.600 mmol, 2.0 equiv.). Reaction time: 5 h. The yield was determined by quantitative  $^1\text{H NMR}$  using 1,3,5-tris(trifluoromethyl)benzene as an internal standard (90%; >95% regioselectivity). The title product was purified by column chromatography (hexane/ toluene, 10:1) as a viscous liquid (83.7 mg, 0.246 mmol, 82%).

$R_f$  = 0.38/ (hexane/ toluene, 10:1).  $^1\text{H NMR}$  (400 MHz,  $\text{CDCl}_3$ )  $\delta$ / ppm = 7.75 (d,  $J$  = 2.3 Hz, 1H), 7.54 (d,  $J$  = 8.6 Hz, 2H), 7.45 (dd,  $J$  = 8.5, 2.3 Hz, 1H), 7.38 (d,  $J$  = 8.4 Hz, 2H), 6.96 (d,  $J$  = 8.5 Hz, 1H), 3.93 (s, 3H).  $^{13}\text{C NMR}$  (101 MHz,  $\text{CDCl}_3$ )  $\delta$ / ppm = 155.7, 138.5, 134.0, 132.1, 131.8, 128.4, 127.0, 121.6, 112.3, 112.3, 56.5. **HRMS** (EI) calculated for  $\text{C}_{13}\text{H}_{10}\text{O}^{79}\text{Br}_2$ : 339.9093  $[\text{M}]^+$ , found: 339.9094.

These data are in agreement with those reported previously in the literature.<sup>4</sup>

### 3-Bromo-4'-chloro-4-methoxy-1,1'-biphenyl

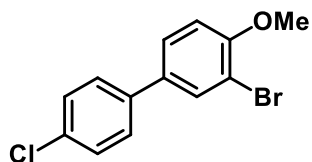

According to GP 3 the C–H functionalization was performed using triethyl(4-chlorophenyl)germane (81.6 mg, 0.300 mmol, 1.0 equiv.) and 2-bromoanisole (74.8  $\mu\text{L}$ , 0.600 mmol, 2.0 equiv.). Reaction time: 5 h. The yield was determined by quantitative  $^1\text{H NMR}$  using 1,3,5-tris(trifluoromethyl)benzene as an internal standard (88%; >95% regioselectivity). The title product was purified by column chromatography (hexane/ toluene, 10:1) as a white solid (70.2 mg, 0.237 mmol, 79%).

$R_f$  = 0.30 (hexane/ toluene, 10:1).  $^1\text{H NMR}$  (600 MHz,  $\text{CDCl}_3$ )  $\delta$ / ppm = 7.75 (d,  $J$  = 2.3 Hz, 1H), 7.46 – 7.43 (m, 3H), 7.40 – 7.37 (m, 2H), 6.95 (d,  $J$  = 8.5 Hz, 1H), 3.93 (s, 3H).  $^{13}\text{C NMR}$  (151 MHz,



$\text{CDCl}_3$ )  $\delta$ / ppm = 155.6, 138.0, 133.9, 133.4, 131.8, 129.1, 128.1, 127.0, 112.2, 112.2, 56.5.

**HRMS** (EI) calculated for  $\text{C}_{13}\text{H}_{10}\text{O}^{79}\text{Br}^{35}\text{Cl}$ : 295.9598  $[\text{M}]^+$ , found: 295.9599.

These data are in agreement with those reported previously in the literature.<sup>4</sup>

#### 4-Bromo-2-(4-fluorophenyl)thiophene & 3-bromo-2-(4-fluorophenyl)thiophene:

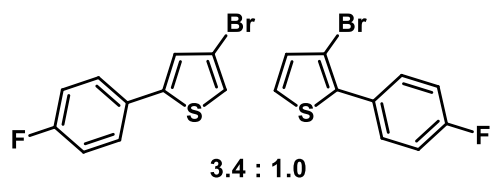

According to GP 3 the C-H functionalization was performed using triethyl(4-fluorophenyl)germane (76.8 mg, 0.300 mmol, 1.0 equiv.) and 3-bromothiophene (56.2  $\mu\text{L}$ , 0.600 mmol, 2.0 equiv.). Reaction time: 16 h. The yield of mono- and bis-arylated product was determined by quantitative  $^{19}\text{F}$  NMR using 1,4-difluorobenzene as an internal standard (*monoarylated*: 46%; 3.4:1 ratio of 5- and 2-isomer; *bis-arylated*: 12%). The title product was purified by column chromatography (hexane/ toluene, 10:1) to give a mixture of both regioisomers as a viscous liquid (30.1 mg, 0.117 mmol, 39%).

*Characterization data for 2- and 5-(4-fluorophenyl)-3-bromothiophene:*

$R_f$  = 0.55 (hexane).  $^1\text{H}$  NMR (600 MHz,  $\text{CDCl}_3$ )  $\delta$ / ppm = 7.65 – 7.57 (m, 2H), 7.56 – 7.49 (m, 0.65H), 7.28 (d,  $J$  = 5.3 Hz, 1H), 7.17 (d,  $J$  = 1.3 Hz, 0.28H), 7.15 – 7.07 (m, 3H), 7.05 (d,  $J$  = 5.3 Hz, 1H).  $^{13}\text{C}$  NMR (151 MHz,  $\text{CDCl}_3$ )  $\delta$ / ppm = 162.7 (d,  $J$  = 248.2 Hz), 144.3, 137.1, 131.6, 130.9 (d,  $J$  = 8.5 Hz), 129.5 (d,  $J$  = 3.6 Hz), 128.9 (d,  $J$  = 3.7 Hz), 127.5 (d,  $J$  = 8.1 Hz), 125.7, 125.0, 121.9, 116.0 (d,  $J$  = 22.1 Hz), 115.6 (d,  $J$  = 22.0 Hz), 110.6, 107.8.  $^{19}\text{F}$  NMR (564 MHz,  $\text{CDCl}_3$ )  $\delta$ / ppm = -113.0 – -113.1 (m), -113.2 – -113.3 (m). **HRMS** (EI) calculated for  $\text{C}_{10}\text{H}_6^{79}\text{BrFS}$ : 255.9352  $[\text{M}]^+$ , found: 255.9348.

These data are in agreement with those reported previously in the literature.<sup>4</sup>

#### 2-(4-Fluorophenyl)thiophene

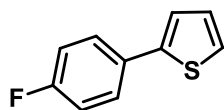

According to GP 3 the C-H functionalization was performed using triethyl(4-fluorophenyl)germane (76.8 mg, 0.300 mmol, 1.0 equiv.) and thiophene (48.1  $\mu\text{L}$ , 0.600 mmol, 2.0 equiv.). Reaction time: 16 h. The yield of mono- and bis-arylated product was determined by quantitative  $^{19}\text{F}$  NMR using fluorobenzene as an internal standard (*monoarylated*: 56%; *bis-arylated*: 16%). The title product was purified by column chromatography (hexane) followed by preparative HPLC (hexane/EtOAc, 97:3) to give a white solid (25.6 mg, 0.144 mmol, 48%).

*Characterization data for mixture of 2-(4-fluorophenyl)thiophene:*

*Characterization data for mixture of 2-(4-fluorophenyl)thiophene:*

*Supporting Information*

**R<sub>f</sub>** = 0.46 (hexane). **<sup>1</sup>H NMR** (600 MHz, CDCl<sub>3</sub>) δ/ ppm = 7.59 – 7.55 (m, 2H), 7.27 (dd, *J* = 5.1, 0.9 Hz, 1H), 7.24 (dd, *J* = 3.6, 1.1 Hz, 1H), 7.09 – 7.05 (m, 3H). **<sup>13</sup>C NMR** (151 MHz, CDCl<sub>3</sub>) δ/ ppm = 162.4 (d, *J* = 247.0 Hz), 143.4, 130.8 (d, *J* = 3.6 Hz), 128.2, 127.7 (d, *J* = 7.9 Hz), 124.9, 123.2, 116.0 (d, *J* = 21.6 Hz). **<sup>19</sup>F NMR** (564 MHz, CDCl<sub>3</sub>) δ/ ppm = -114.72 – -114.87 (m). **HRMS** (EI) calculated for C<sub>10</sub>H<sub>7</sub>FS: 178.0247 [M]<sup>+</sup>, found: 178.0251.

These data are in agreement with those reported previously in the literature.<sup>6</sup>

## Computational Details

### General Details

All calculations were performed using the Gaussian software package (Gaussian16, revision A.03).<sup>7</sup> Structures were optimized with  $\omega$ B97XD and 6-31G(d) basis set (LANL2DZ for Au). Single point energy calculations were performed on the optimized structures using M06L in combination with a 6-311++G(d,p) basis set (LANL2DZ for Au). The effect of solvation was accounted for using the CPCM solvation model for 1,4-dioxane. All stationary points were fully characterized *via* frequency calculations, at the same level of theory, as either ground states (zero imaginary frequencies) or transition states (one imaginary frequency). For transition states, IRC calculations and subsequent geometry optimizations were used to confirm the minima linked by each transition state. Frequency calculations also provided zero-point energy (ZPE) and Gibbs free energy ( $\Delta G$ ) corrections in the gas-phase, computed at 298.15 K and 1 atm. Reported Gibbs free energies were determined by summing the SCF energy, zero-point energy and Gibbs free energy correction determined at the 1 M standard state (addition of 1.89 kcal mol<sup>-1</sup> to every species). Images were created using the CYLview software.<sup>8</sup>

### Distortion/Interaction Analysis

In order to gain insight into the factors that affect the reaction barrier for transmetalation on Au<sup>(I)</sup> and Au<sup>(III)</sup>, the distortion/interaction model was used.<sup>9</sup> The transition state and preceding ground state structures were each divided into two fragments, Ph-Y (Y = SiMe<sub>3</sub>, GeMe<sub>3</sub>) and the active gold complex (Au<sup>(I)</sup> or Au<sup>(III)</sup>). Single point energy calculations were performed on each fragment in the same geometry as the original optimized structures. The distortion energy ( $\Delta E_{\text{Distortion}}$ ) is the energy difference between the distorted structure of the transition state and the distorted structure of the preceding ground-state or the isolated optimized fragments. The results are displayed in Table S4 and S5. Energies are reported in kcal mol<sup>-1</sup>.

**Table S4:** Distortion/interaction energy analysis with [Au(OMs)<sub>3</sub>].

| entry | Ph-Y                 | $\Delta E$ | $\Delta E_{\text{Dist}}(\text{Ph-Y})$ | $\Delta E_{\text{Dist}}(\text{Au})$ | $\Delta E_{\text{Int}}$ |
|-------|----------------------|------------|---------------------------------------|-------------------------------------|-------------------------|
| 1     | Ph-SiMe <sub>3</sub> | 5.8        | 51.7                                  | 0.1                                 | 46.0                    |
| 2     | Ph-GeMe <sub>3</sub> | 1.6        | 28.3                                  | 3.5                                 | 30.2                    |

**Table S5:** Distortion/interaction energy analysis with [(PPh<sub>3</sub>)Au][OMs].

| entry    | Ph-Y                | $\Delta E$ | $\Delta E_{\text{Dist}}(\text{Ph-Y})$ | $\Delta E_{\text{Dist}}(\text{Au})$ | $\Delta E_{\text{Int}}$ |
|----------|---------------------|------------|---------------------------------------|-------------------------------------|-------------------------|
| <b>1</b> | PhGeMe <sub>3</sub> | 13.2       | 67.3                                  | 7.1                                 | 61.2                    |

### Bond Dissociation Energies

Bond strengths discussed in the main text were calculated using DFT. BDE is defined as the change in enthalpy ( $\Delta H$ ) for homolytic cleavage of the Ph-Y bond. The geometry of each radical containing fragment was optimized, and single point calculations were performed at the same level of theory as previously stated. Reported enthalpies were determined by summing the SCF energy, zero-point energy and enthalpy energy correction. The results are displayed in Table S6. Energies are reported in kcal mol<sup>-1</sup>.

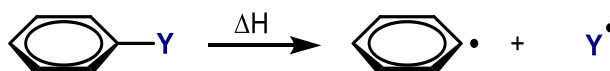**Table S6:** Bond dissociation energies.

| Entry    | Ph-Y                 | $\Delta H$ (kcal mol <sup>-1</sup> ) |
|----------|----------------------|--------------------------------------|
| <b>1</b> | Ph-SiMe <sub>3</sub> | 94.7                                 |
| <b>2</b> | Ph-GeMe <sub>3</sub> | 85.2                                 |

## Bond Activation with Au(III)

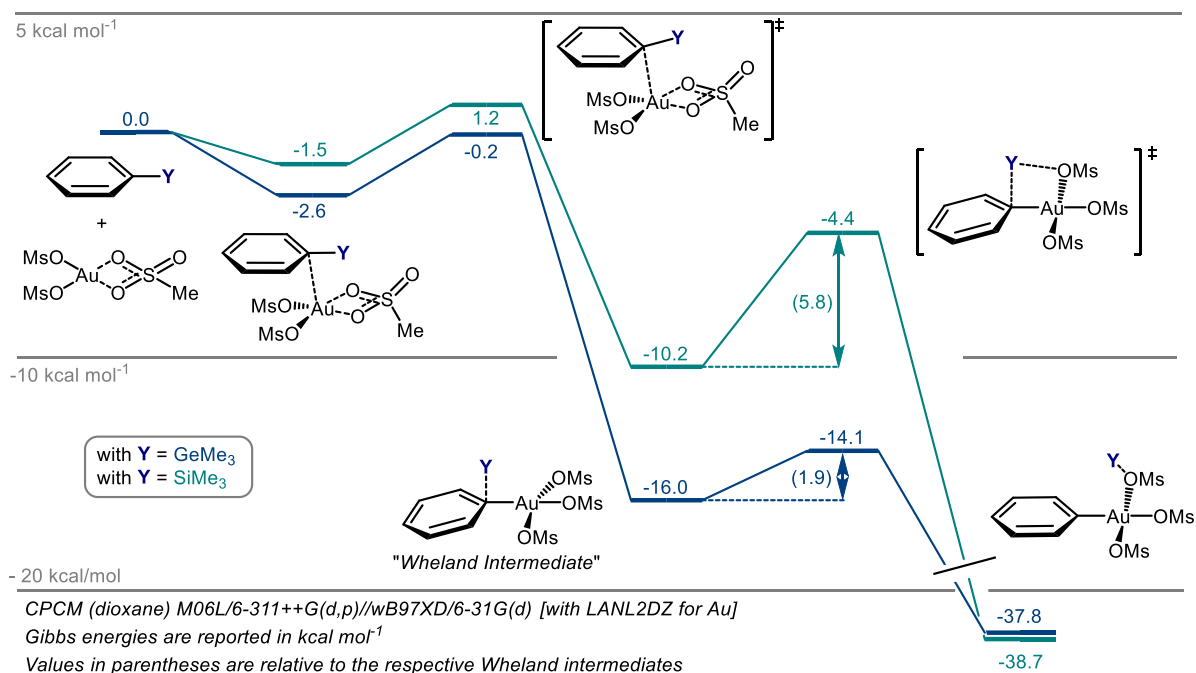

**Figure S2:** CPCM (1,4-dioxane) M06L/6-311++G(d,p)// ωB97XD/6-31G(d) [with LANL2DZ for Au]. Gibbs energies are reported in kcal mol<sup>-1</sup>. Values in parentheses are relative to Wheland complex

## Bond Activation with Au(I)

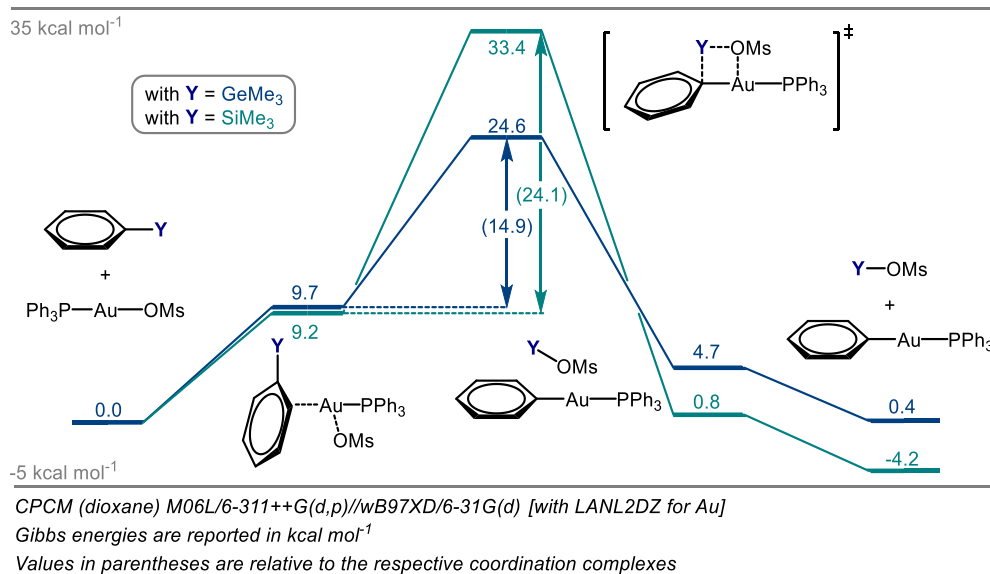

**Figure S3:** CPCM (1,4-dioxane) M06L/6-311++G(d,p)// ωB97XD/6-31G(d) [with LANL2DZ for Au]. Gibbs energies are reported in kcal mol<sup>-1</sup>. Values in parentheses are relative to precoordination complex

## XYZ Coordinates and Energies of Optimized Structures

## General Structures

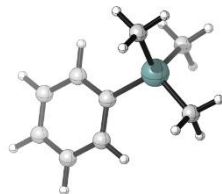

|    |          |          |          |
|----|----------|----------|----------|
| H  | 3.40807  | 2.13662  | -0.00007 |
| H  | 0.94598  | 2.16520  | -0.00013 |
| H  | 0.90056  | -2.13197 | 0.00010  |
| H  | 3.36131  | -2.15769 | 0.00018  |
| H  | 4.63122  | -0.02348 | 0.00010  |
| H  | -2.93985 | -1.02355 | 1.60408  |
| H  | -1.42748 | -1.94860 | 1.64066  |
| H  | -1.53942 | -0.40613 | 2.50504  |
| H  | -2.93953 | -1.02358 | -1.60455 |
| H  | -1.53838 | -0.40710 | -2.50503 |
| H  | -1.42752 | -1.94922 | -1.63988 |
| H  | -1.53243 | 2.38828  | 0.88739  |
| H  | -1.53252 | 2.38816  | -0.88784 |
| H  | -2.97476 | 1.86764  | -0.00010 |
| C  | 2.85871  | 1.19924  | -0.00003 |
| C  | 1.46514  | 1.20946  | -0.00006 |
| C  | 0.72996  | 0.01971  | -0.00001 |
| C  | 1.44075  | -1.18674 | 0.00007  |
| C  | 2.83234  | -1.20867 | 0.00011  |
| C  | 3.54496  | -0.01156 | 0.00006  |
| C  | -1.84844 | -0.93882 | 1.60066  |
| C  | -1.84810 | -0.93926 | -1.60057 |
| C  | -1.88047 | 1.85035  | -0.00017 |
| Ge | -1.22389 | 0.00510  | -0.00001 |

Zero-point correction= 0.203747 (Hartree/Particle)

Thermal correction to Energy= 0.216464

Thermal correction to Enthalpy= 0.217409

Thermal correction to Gibbs Free Energy= 0.163872

Sum of electronic and zero-point Energies= -2425.848786

Sum of electronic and thermal Energies= -2425.836068

Sum of electronic and thermal Enthalpies= -2425.835124

Sum of electronic and thermal Free Energies= -2425.888661

E(RM06L) = -2428.35884854

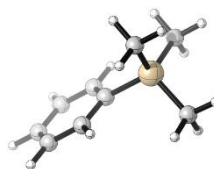

|    |          |          |          |
|----|----------|----------|----------|
| H  | -3.10484 | 2.13776  | 0.00011  |
| H  | -0.64498 | 2.16941  | 0.00020  |
| H  | -0.59880 | -2.13295 | -0.00024 |
| H  | -3.05728 | -2.15598 | -0.00034 |
| H  | -4.32684 | -0.02227 | -0.00016 |
| H  | 3.16549  | -0.95850 | -1.55623 |
| H  | 1.68186  | -1.92391 | -1.57510 |
| H  | 1.74476  | -0.38852 | -2.45059 |
| H  | 3.16536  | -0.95880 | 1.55630  |
| H  | 1.74455  | -0.38902 | 2.45065  |
| H  | 1.68173  | -1.92422 | 1.57484  |
| H  | 1.78380  | 2.32675  | -0.88602 |
| H  | 1.78373  | 2.32659  | 0.88660  |
| H  | 3.21157  | 1.77601  | 0.00029  |
| C  | -2.55482 | 1.20077  | 0.00003  |
| C  | -1.16125 | 1.21208  | 0.00008  |
| C  | -0.42195 | 0.02189  | -0.00002 |
| C  | -1.13656 | -1.18610 | -0.00017 |
| C  | -2.52776 | -1.20728 | -0.00022 |
| C  | -3.24057 | -0.01005 | -0.00012 |
| C  | 2.07087  | -0.89977 | -1.53803 |
| C  | 2.07074  | -0.90007 | 1.53801  |
| C  | 2.11547  | 1.77380  | 0.00025  |
| Si | 1.46321  | 0.00615  | 0.00006  |

Zero-point correction= 0.204755 (Hartree/Particle)

Thermal correction to Energy= 0.216891

Thermal correction to Enthalpy= 0.217835

Thermal correction to Gibbs Free Energy= 0.166453

Sum of electronic and zero-point Energies= -640.578917

Sum of electronic and thermal Energies= -640.566780

Sum of electronic and thermal Enthalpies= -640.565836

Sum of electronic and thermal Free Energies= -640.617219

E(RM06L) = -640.965489233

## Bond Activation with Au(III)

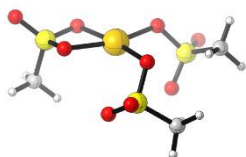

|    |          |          |          |
|----|----------|----------|----------|
| H  | -2.12622 | 0.30452  | 2.28617  |
| H  | -3.81409 | 0.83965  | 2.00034  |
| H  | -3.48784 | -0.87205 | 2.44006  |
| H  | 3.72359  | -1.55201 | -1.52718 |
| H  | 3.17962  | 0.08592  | -1.03498 |
| H  | 4.49180  | -0.74708 | -0.12197 |
| H  | 3.24607  | 2.56977  | -0.01200 |
| H  | 2.57782  | 3.26256  | 1.49604  |
| H  | 2.68217  | 1.47440  | 1.31356  |
| C  | -3.11086 | 0.00904  | 1.91810  |
| C  | 3.56689  | -0.87301 | -0.68817 |
| C  | 2.52995  | 2.42420  | 0.79826  |
| O  | 0.97225  | 1.16395  | -0.89395 |
| O  | -1.91989 | -1.52998 | 0.09704  |
| O  | -4.24811 | -0.67369 | -0.38525 |
| O  | -0.06316 | 2.07601  | 1.16400  |
| O  | -2.16105 | 0.75506  | -0.43894 |
| O  | 1.07999  | -1.67228 | -0.55417 |
| O  | 2.08095  | -0.67427 | 1.49049  |
| O  | 2.73616  | -2.96695 | 0.68391  |
| O  | 0.69999  | 3.61431  | -0.68002 |
| S  | -2.96532 | -0.39242 | 0.19514  |
| S  | 0.88924  | 2.41786  | 0.11151  |
| S  | 2.35711  | -1.60097 | 0.39853  |
| Au | -0.33294 | -0.28172 | -0.43237 |

Zero-point correction= 0.160004 (Hartree/Particle)

Thermal correction to Energy= 0.179112

Thermal correction to Enthalpy= 0.180056

Thermal correction to Gibbs Free Energy= 0.110940

Sum of electronic and zero-point Energies= -2126.064446

Sum of electronic and thermal Energies= -2126.045338

Sum of electronic and thermal Enthalpies= -2126.044394

Sum of electronic and thermal Free Energies= -2126.113510

E(RM06L) = -2126.79040970

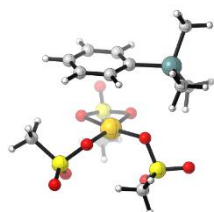

|   |          |          |          |
|---|----------|----------|----------|
| H | -2.87493 | -1.12004 | -3.30017 |
| H | -2.68554 | -2.02201 | -1.75654 |
| H | -4.32387 | -1.60979 | -2.36258 |
| H | -2.46058 | -0.72512 | 2.88885  |

|    |          |          |          |
|----|----------|----------|----------|
| H  | -2.76372 | -2.48128 | 3.13045  |
| H  | -1.54154 | -1.63551 | 4.14114  |
| H  | -0.55535 | 4.13383  | -1.09750 |
| H  | -1.99121 | 3.08817  | -0.84502 |
| H  | -1.80397 | 4.60372  | 0.10193  |
| H  | 1.50570  | 0.35484  | -2.62651 |
| H  | -0.06365 | -1.27914 | -3.58332 |
| H  | -0.28924 | -3.53999 | -2.56750 |
| H  | 1.06905  | -4.12913 | -0.57199 |
| H  | 2.64694  | -2.50163 | 0.37492  |
| H  | 4.11989  | 2.72154  | -0.90037 |
| H  | 3.64016  | 1.84120  | -2.36287 |
| H  | 2.40361  | 2.41461  | -1.21389 |
| H  | 4.02574  | 1.02012  | 2.09153  |
| H  | 2.30882  | 1.27732  | 1.72356  |
| H  | 2.90233  | -0.35542 | 2.08679  |
| H  | 5.32173  | -1.47633 | -0.02076 |
| H  | 5.51372  | -0.65595 | -1.58055 |
| H  | 6.06146  | 0.13354  | -0.08715 |
| C  | -3.28234 | -1.28878 | -2.30279 |
| C  | -2.01745 | -1.68566 | 3.16029  |
| C  | -1.28309 | 3.76945  | -0.37147 |
| C  | 2.21549  | -0.94690 | -1.06035 |
| C  | 1.43126  | -0.63215 | -2.17705 |
| C  | 0.53535  | -1.55554 | -2.72036 |
| C  | 0.40689  | -2.81800 | -2.14974 |
| C  | 1.17481  | -3.15260 | -1.03464 |
| C  | 2.06559  | -2.22529 | -0.50212 |
| C  | 3.40900  | 1.99417  | -1.30376 |
| C  | 3.14929  | 0.59076  | 1.59600  |
| C  | 5.28433  | -0.50344 | -0.52155 |
| O  | -1.67811 | 0.58030  | -1.41598 |
| O  | 0.18609  | -0.86490 | 1.93243  |
| O  | -0.15646 | -3.34957 | 2.24960  |
| O  | -3.67146 | 0.00744  | -0.03940 |
| O  | -1.43434 | -1.93957 | 0.58730  |
| O  | -3.86700 | 1.29017  | -2.19976 |
| O  | 0.28819  | 1.71037  | 0.08066  |
| O  | -1.35995 | 2.30670  | 1.83214  |
| O  | 0.67995  | 3.72760  | 1.39528  |
| S  | -0.76155 | -2.07601 | 1.96836  |
| S  | -3.23861 | 0.25215  | -1.40813 |
| S  | -0.40064 | 2.89705  | 0.90545  |
| Ge | 3.51482  | 0.31668  | -0.30602 |
| Au | -0.66655 | -0.03021 | 0.19780  |

Zero-point correction= 0.364468 (Hartree/Particle)

Thermal correction to Energy= 0.398574

Thermal correction to Enthalpy= 0.399518

Thermal correction to Gibbs Free Energy= 0.294071

Sum of electronic and zero-point Energies= -4551.946305

Sum of electronic and thermal Energies= -4551.912199

Sum of electronic and thermal Enthalpies= -4551.911254

Sum of electronic and thermal Free Energies= -4552.016701

E(RM06L) = -4555.17044479

## Supporting Information

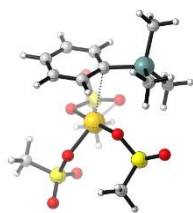

|    |          |          |          |
|----|----------|----------|----------|
| H  | -4.03087 | -0.99877 | -2.46323 |
| H  | -3.32756 | -1.94820 | -1.10574 |
| H  | -5.05357 | -1.45015 | -1.06192 |
| H  | -2.49616 | -1.08731 | 2.48600  |
| H  | -2.78646 | -2.85572 | 2.39967  |
| H  | -1.71509 | -2.19696 | 3.67977  |
| H  | -1.07215 | 4.18896  | -1.20243 |
| H  | -2.29897 | 3.04966  | -0.55403 |
| H  | -1.88955 | 4.54445  | 0.35324  |
| H  | 1.43740  | 0.51184  | -2.40977 |
| H  | 0.26359  | -1.20023 | -3.74810 |
| H  | 0.26678  | -3.57170 | -3.00408 |
| H  | 1.40252  | -4.20043 | -0.88668 |
| H  | 2.55688  | -2.50500 | 0.45343  |
| H  | 4.34027  | 2.61662  | -0.64463 |
| H  | 3.72968  | 1.76178  | -2.07109 |
| H  | 2.60182  | 2.61380  | -0.98072 |
| H  | 3.54832  | 1.36730  | 2.37779  |
| H  | 1.83139  | 1.25015  | 1.95932  |
| H  | 2.71516  | -0.20252 | 2.44505  |
| H  | 4.96252  | -1.50046 | 0.64150  |
| H  | 5.35464  | -0.82446 | -0.95182 |
| H  | 5.82012  | 0.04469  | 0.52398  |
| C  | -4.04774 | -1.17827 | -1.38765 |
| C  | -2.06670 | -2.07611 | 2.65358  |
| C  | -1.50950 | 3.75770  | -0.30114 |
| C  | 2.09357  | -0.85286 | -0.86156 |
| C  | 1.41796  | -0.51781 | -2.06082 |
| C  | 0.76919  | -1.49019 | -2.83238 |
| C  | 0.77250  | -2.81303 | -2.41476 |
| C  | 1.42047  | -3.17045 | -1.22671 |
| C  | 2.06604  | -2.20784 | -0.46877 |
| C  | 3.51173  | 2.01289  | -1.02779 |
| C  | 2.79386  | 0.73853  | 1.89444  |
| C  | 5.04090  | -0.57279 | 0.06581  |
| O  | -2.16321 | 0.62704  | -1.15719 |
| O  | 0.28895  | -1.14900 | 1.87675  |
| O  | -0.16666 | -3.62139 | 1.66342  |
| O  | -3.50887 | 0.05436  | 0.87335  |
| O  | -1.18218 | -1.91700 | 0.15199  |
| O  | -4.44835 | 1.40943  | -1.02164 |
| O  | 0.26375  | 1.80489  | -0.45208 |
| O  | -0.79407 | 2.22011  | 1.73560  |
| O  | 0.89819  | 3.81870  | 0.76632  |
| S  | -0.65819 | -2.26353 | 1.59221  |
| S  | -3.59693 | 0.33057  | -0.55368 |
| S  | -0.22017 | 2.91324  | 0.58856  |
| Ge | 3.33449  | 0.39681  | 0.05140  |
| Au | -0.48524 | -0.01956 | -0.14683 |

Zero-point correction= 0.364351 (Hartree/Particle)  
 Thermal correction to Energy= 0.397642  
 Thermal correction to Enthalpy= 0.398586  
 Thermal correction to Gibbs Free Energy= 0.297146  
 Sum of electronic and zero-point Energies= -4551.937231  
 Sum of electronic and thermal Energies= -4551.903940  
 Sum of electronic and thermal Enthalpies= -4551.902996  
 Sum of electronic and thermal Free Energies= -4552.004436  
 E(RM06L) = -4555.16944888

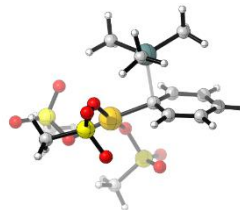

|   |          |          |          |
|---|----------|----------|----------|
| H | 2.99666  | 1.66675  | 1.49086  |
| H | 3.58325  | 2.94394  | 0.37713  |
| H | 3.08638  | 3.37432  | 2.04469  |
| H | 2.44868  | -2.42996 | 1.39561  |
| H | 1.94370  | -3.73553 | 2.53375  |
| H | 1.68976  | -3.92109 | 0.76530  |
| H | 3.40741  | 1.33170  | -1.77272 |
| H | 4.83911  | 0.60142  | -0.96265 |
| H | 4.51360  | 0.25529  | -2.69009 |
| H | -3.00357 | 3.63153  | -0.86104 |
| H | -3.76801 | 1.15598  | 2.57633  |
| H | -4.08701 | -1.82431 | 0.67408  |
| H | -3.77605 | -2.94707 | -0.66447 |
| H | -2.52669 | -2.69594 | 0.57444  |
| H | -0.57074 | -1.84656 | -2.15472 |
| H | -1.93719 | -1.78267 | -3.30018 |
| H | -0.96610 | -0.32904 | -2.98711 |
| H | -4.86048 | -0.50391 | -2.27646 |
| H | -4.72340 | 0.72744  | -1.01206 |
| H | -3.89122 | 0.95966  | -2.56972 |
| H | -1.89422 | -0.32578 | 1.93420  |
| H | -1.18067 | 2.12102  | -1.55331 |
| H | -4.28751 | 3.15325  | 1.20548  |
| C | 2.90078  | 2.71337  | 1.19623  |
| C | 1.72310  | -3.21800 | 1.59833  |
| C | 4.06358  | 0.46105  | -1.71728 |
| C | -1.76670 | 1.89482  | -0.66887 |
| C | -2.78326 | 2.74532  | -0.27612 |
| C | -3.50291 | 2.47207  | 0.88975  |
| C | -3.21738 | 1.34914  | 1.66209  |
| C | -2.17931 | 0.50245  | 1.29235  |
| C | -1.45473 | 0.73737  | 0.09595  |
| C | -3.31501 | -2.20722 | 0.00124  |
| C | -1.38731 | -1.22832 | -2.53056 |
| C | -4.18190 | 0.22417  | -1.81699 |
| O | 1.07445  | 1.92383  | -0.51068 |
| O | -0.14741 | -1.83418 | 0.34840  |
| O | -0.87514 | -3.53750 | 1.91994  |
| O | 1.16626  | 4.30418  | -0.00605 |



## Supporting Information

|    |          |          |          |
|----|----------|----------|----------|
| O  | 0.16937  | -1.41859 | 2.76976  |
| O  | 0.32164  | 2.69671  | 1.73294  |
| O  | 2.49596  | -0.50084 | 0.12280  |
| O  | 3.93042  | -2.09933 | -1.07597 |
| O  | 1.96772  | -1.03543 | -2.22661 |
| S  | 0.11502  | -2.48093 | 1.76877  |
| S  | 1.23250  | 3.00435  | 0.63672  |
| S  | 3.06551  | -0.94512 | -1.25748 |
| Ge | -2.65875 | -0.78099 | -1.13502 |
| Au | 0.47109  | 0.06950  | 0.02825  |

Zero-point correction= 0.366377 (Hartree/Particle)

Thermal correction to Energy= 0.399663

Thermal correction to Enthalpy= 0.400607

Thermal correction to Gibbs Free Energy= 0.299546

Sum of electronic and zero-point Energies= -4551.968599

Sum of electronic and thermal Energies= -4551.935312

Sum of electronic and thermal Enthalpies= -4551.934368

Sum of electronic and thermal Free Energies= -4552.035429

E(RM06L) = -4555.19913442

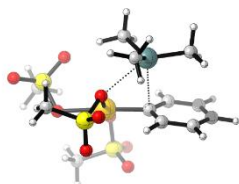

|   |          |          |          |
|---|----------|----------|----------|
| H | 4.02843  | 0.43730  | 0.56254  |
| H | 4.62214  | 1.64076  | -0.63557 |
| H | 4.89787  | 1.91307  | 1.11437  |
| H | 1.46589  | -2.26066 | 2.16359  |
| H | 0.51402  | -3.55861 | 2.96777  |
| H | 0.74423  | -3.55571 | 1.17628  |
| H | 4.06579  | -0.81835 | -1.98973 |
| H | 4.59358  | -2.21695 | -0.99060 |
| H | 4.03130  | -2.47610 | -2.67155 |
| H | -1.82856 | 4.42760  | -1.37946 |
| H | -3.67777 | 2.36258  | 1.90445  |
| H | -4.59966 | -0.09578 | 0.85673  |
| H | -4.93734 | -1.51434 | -0.16495 |
| H | -3.67298 | -1.62555 | 1.07925  |
| H | -1.90159 | -2.66872 | -1.42917 |
| H | -2.45496 | -1.87031 | -2.94641 |
| H | -0.88881 | -1.44683 | -2.21015 |
| H | -4.38250 | 0.58270  | -2.70170 |
| H | -3.91766 | 1.88138  | -1.58239 |
| H | -2.78303 | 1.34493  | -2.85512 |
| H | -1.93377 | 0.61839  | 1.79394  |
| H | -0.10703 | 2.66661  | -1.53283 |
| H | -3.60740 | 4.29571  | 0.34776  |
| C | 4.22036  | 1.49406  | 0.36811  |
| C | 0.62219  | -2.94414 | 2.07182  |
| C | 3.90942  | -1.87523 | -1.76872 |
| C | -0.91221 | 2.57862  | -0.81269 |
| C | -1.87189 | 3.57437  | -0.70972 |
| C | -2.87491 | 3.49877  | 0.26315  |

|    |          |          |          |
|----|----------|----------|----------|
| C  | -2.91980 | 2.41784  | 1.12909  |
| C  | -1.95656 | 1.40240  | 1.04335  |
| C  | -0.95234 | 1.48939  | 0.06955  |
| C  | -4.14976 | -0.95653 | 0.35959  |
| C  | -1.92203 | -1.73755 | -1.99634 |
| C  | -3.54542 | 1.02446  | -2.14340 |
| O  | 1.80248  | 1.61825  | -0.60678 |
| O  | -0.77634 | -1.28966 | 0.51502  |
| O  | -1.99843 | -2.92256 | 1.80282  |
| O  | 2.85643  | 3.73162  | 0.03796  |
| O  | -0.91258 | -0.99288 | 2.98207  |
| O  | 2.10433  | 2.10525  | 1.80889  |
| O  | 2.21952  | -1.19892 | 0.07626  |
| O  | 2.03541  | -3.48700 | -0.85637 |
| O  | 1.34661  | -1.49823 | -2.20872 |
| S  | -0.87536 | -2.00203 | 1.93073  |
| S  | 2.66834  | 2.36551  | 0.48931  |
| S  | 2.23461  | -2.08114 | -1.19143 |
| Ge | -2.90364 | -0.40604 | -1.00658 |
| Au | 0.56839  | 0.17832  | 0.07625  |

Zero-point correction= 0.366113 (Hartree/Particle)

Thermal correction to Energy= 0.398640

Thermal correction to Enthalpy= 0.399585

Thermal correction to Gibbs Free Energy= 0.300266

Sum of electronic and zero-point Energies= -4551.963424

Sum of electronic and thermal Energies= -4551.930897

Sum of electronic and thermal Enthalpies= -4551.929953

Sum of electronic and thermal Free Energies= -4552.029271

E(RM06L) = -4555.19650578

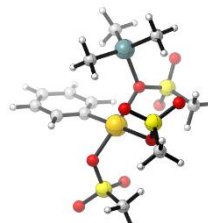

|   |          |          |          |
|---|----------|----------|----------|
| H | 3.38502  | -2.05325 | 0.40603  |
| H | 4.61447  | -1.49136 | -0.78475 |
| H | 5.02674  | -1.56448 | 0.95867  |
| H | -0.12300 | -2.06455 | 2.34366  |
| H | -1.57232 | -2.30701 | 3.39060  |
| H | -1.62276 | -2.69709 | 1.62238  |
| H | 2.39819  | -3.58098 | -1.63125 |
| H | 1.76721  | -4.66512 | -0.34456 |
| H | 1.11046  | -4.76862 | -2.00811 |
| H | 1.00972  | 4.52423  | -2.53300 |
| H | -0.22609 | 5.85775  | -0.84189 |
| H | -1.00209 | 4.78098  | 1.25676  |
| H | -3.05720 | 2.48325  | 0.04674  |
| H | -4.45095 | 2.04011  | -0.95581 |
| H | -4.35601 | 1.46991  | 0.73500  |
| H | -4.31743 | -1.71264 | 0.12112  |
| H | -4.34492 | -1.69036 | -1.66247 |
| H | -2.94576 | -2.38392 | -0.81372 |

## Supporting Information

|    |          |          |          |
|----|----------|----------|----------|
| H  | -2.57722 | 0.49454  | -3.24782 |
| H  | -1.37361 | 1.47962  | -2.38869 |
| H  | -1.10654 | -0.28238 | -2.62440 |
| H  | -0.58493 | 2.37559  | 1.65163  |
| H  | 1.45908  | 2.12263  | -2.13504 |
| C  | 4.23192  | -1.38744 | 0.23165  |
| C  | -1.21141 | -2.04381 | 2.39393  |
| C  | 1.52082  | -4.10328 | -1.24670 |
| C  | 0.89556  | 2.69953  | -1.41035 |
| C  | 0.64708  | 4.05436  | -1.62398 |
| C  | -0.04347 | 4.80101  | -0.67308 |
| C  | -0.48294 | 4.19870  | 0.50154  |
| C  | -0.25396 | 2.84051  | 0.72976  |
| C  | 0.41573  | 2.11680  | -0.24571 |
| C  | -3.77996 | 1.68911  | -0.16425 |
| C  | -3.70775 | -1.59842 | -0.77682 |
| C  | -1.84747 | 0.49637  | -2.42912 |
| O  | 2.53079  | 0.37662  | -0.66884 |
| O  | -1.38057 | -0.12882 | 0.52509  |
| O  | -3.21468 | -0.33922 | 2.15376  |
| O  | 4.71648  | 1.20294  | 0.07852  |
| O  | -0.97398 | 0.54040  | 2.89231  |
| O  | 3.03033  | 0.38323  | 1.76560  |
| O  | 0.96247  | -2.04343 | 0.22961  |
| O  | -0.88510 | -3.60485 | -0.30680 |
| O  | 0.03442  | -2.08696 | -2.05268 |
| S  | -1.76542 | -0.38620 | 2.11078  |
| S  | 3.65802  | 0.28733  | 0.45340  |
| S  | 0.27578  | -2.89127 | -0.84876 |
| Ge | -2.83205 | 0.12498  | -0.80518 |
| Au | 0.65766  | 0.13286  | -0.01134 |

Zero-point correction= 0.366289 (Hartree/Particle)  
 Thermal correction to Energy= 0.399747  
 Thermal correction to Enthalpy= 0.400691  
 Thermal correction to Gibbs Free Energy= 0.299019  
 Sum of electronic and zero-point Energies= -4552.008330  
 Sum of electronic and thermal Energies= -4551.974873  
 Sum of electronic and thermal Enthalpies= -4551.973928  
 Sum of electronic and thermal Free Energies= -4552.075601  
 E(RM06L) = -4555.23328047

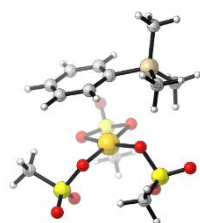

|   |          |          |          |
|---|----------|----------|----------|
| H | -2.60980 | -1.38690 | -3.24880 |
| H | -2.31654 | -2.24185 | -1.69439 |
| H | -3.99408 | -1.99034 | -2.28045 |
| H | -2.13101 | -0.84040 | 2.92362  |
| H | -2.26928 | -2.61215 | 3.20006  |
| H | -1.11313 | -1.64060 | 4.17471  |
| H | -0.77891 | 4.10003  | -1.15804 |
| H | -2.09912 | 2.92073  | -0.86693 |

|    |          |          |          |
|----|----------|----------|----------|
| H  | -2.04796 | 4.46027  | 0.05771  |
| H  | 1.65834  | 0.48109  | -2.67822 |
| H  | 0.19372  | -1.28326 | -3.56018 |
| H  | 0.16478  | -3.53391 | -2.49923 |
| H  | 1.60977  | -3.98000 | -0.52856 |
| H  | 3.08453  | -2.22494 | 0.34821  |
| H  | 4.11763  | 2.96594  | -1.01239 |
| H  | 3.65399  | 2.06448  | -2.46316 |
| H  | 2.41961  | 2.55138  | -1.27662 |
| H  | 4.17294  | 1.46246  | 1.84167  |
| H  | 2.42871  | 1.40076  | 1.55084  |
| H  | 3.31150  | -0.08300 | 1.94658  |
| H  | 5.59709  | -1.00399 | -0.14328 |
| H  | 5.66034  | -0.23830 | -1.73744 |
| H  | 6.18421  | 0.65834  | -0.30060 |
| C  | -2.98533 | -1.57512 | -2.24241 |
| C  | -1.59814 | -1.75172 | 3.20338  |
| C  | -1.45442 | 3.67532  | -0.41455 |
| C  | 2.50782  | -0.73037 | -1.10507 |
| C  | 1.67136  | -0.49846 | -2.20698 |
| C  | 0.83390  | -1.49704 | -2.70914 |
| C  | 0.81489  | -2.75382 | -2.11285 |
| C  | 1.63223  | -3.00792 | -1.01165 |
| C  | 2.46440  | -2.00752 | -0.51893 |
| C  | 3.44607  | 2.18858  | -1.39414 |
| C  | 3.36953  | 0.86325  | 1.39739  |
| C  | 5.44600  | -0.05899 | -0.67796 |
| O  | -1.54594 | 0.44890  | -1.41401 |
| O  | 0.50080  | -0.75665 | 1.92237  |
| O  | 0.39231  | -3.25579 | 2.28848  |
| O  | -3.45385 | -0.28253 | 0.00791  |
| O  | -1.03598 | -1.99999 | 0.62535  |
| O  | -3.80449 | 0.94007  | -2.16772 |
| O  | 0.32309  | 1.78971  | 0.03676  |
| O  | -1.34895 | 2.24406  | 1.80811  |
| O  | 0.53045  | 3.85569  | 1.31828  |
| Si | 3.69110  | 0.59003  | -0.43554 |
| S  | -0.33120 | -2.04826 | 1.99623  |
| S  | -3.06904 | -0.02190 | -1.37217 |
| S  | -0.46830 | 2.91411  | 0.85771  |
| Au | -0.45602 | -0.03436 | 0.19174  |

Zero-point correction= 0.365709 (Hartree/Particle)  
 Thermal correction to Energy= 0.399043  
 Thermal correction to Enthalpy= 0.399987  
 Thermal correction to Gibbs Free Energy= 0.297659  
 Sum of electronic and zero-point Energies= -2766.674712  
 Sum of electronic and thermal Energies= -2766.641377  
 Sum of electronic and thermal Enthalpies= -2766.640433  
 Sum of electronic and thermal Free Energies= -2766.742761  
 E(RM06L) = -2767.77648099

## Supporting Information

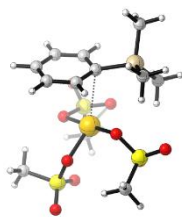

|    |          |          |          |
|----|----------|----------|----------|
| H  | -3.70354 | -1.25132 | -2.49980 |
| H  | -2.94343 | -2.14216 | -1.13290 |
| H  | -4.70587 | -1.79092 | -1.11513 |
| H  | -2.25458 | -1.23866 | 2.46439  |
| H  | -2.41499 | -3.02191 | 2.35112  |
| H  | -1.41632 | -2.30534 | 3.65858  |
| H  | -1.18128 | 4.15681  | -1.18130 |
| H  | -2.32207 | 2.92011  | -0.55440 |
| H  | -2.03791 | 4.43419  | 0.36909  |
| H  | 1.62825  | 0.66687  | -2.38284 |
| H  | 0.58968  | -1.12105 | -3.73053 |
| H  | 0.74694  | -3.48648 | -2.98560 |
| H  | 1.89516  | -4.03692 | -0.85367 |
| H  | 2.91527  | -2.27060 | 0.49948  |
| H  | 4.30668  | 2.87980  | -0.53725 |
| H  | 3.85045  | 1.99918  | -2.00148 |
| H  | 2.60008  | 2.72905  | -0.96232 |
| H  | 3.67221  | 1.59574  | 2.31600  |
| H  | 1.96601  | 1.40260  | 1.89989  |
| H  | 2.90906  | -0.00506 | 2.38993  |
| H  | 5.20040  | -1.10652 | 0.65234  |
| H  | 5.52863  | -0.42246 | -0.94818 |
| H  | 5.93101  | 0.49713  | 0.51126  |
| C  | -3.72153 | -1.43474 | -1.42490 |
| C  | -1.75788 | -2.19607 | 2.62771  |
| C  | -1.59227 | 3.68498  | -0.28798 |
| C  | 2.35966  | -0.64756 | -0.82137 |
| C  | 1.67582  | -0.36110 | -2.03159 |
| C  | 1.10360  | -1.37574 | -2.80900 |
| C  | 1.19237  | -2.69523 | -2.39048 |
| C  | 1.84845  | -3.00811 | -1.19428 |
| C  | 2.41879  | -2.00483 | -0.42937 |
| C  | 3.55789  | 2.20280  | -0.96463 |
| C  | 2.95030  | 0.93198  | 1.82563  |
| C  | 5.19280  | -0.18051 | 0.06638  |
| O  | -1.99825 | 0.52222  | -1.16055 |
| O  | 0.53623  | -1.09037 | 1.90180  |
| O  | 0.26660  | -3.58676 | 1.65743  |
| O  | -3.32634 | -0.16654 | 0.84608  |
| O  | -0.84530 | -1.94733 | 0.14358  |
| O  | -4.34120 | 1.11031  | -1.06418 |
| O  | 0.32549  | 1.87405  | -0.43752 |
| O  | -0.77944 | 2.18828  | 1.74285  |
| O  | 0.79462  | 3.92001  | 0.80283  |
| Si | 3.48833  | 0.62938  | 0.05490  |
| S  | -0.32104 | -2.26704 | 1.59056  |
| S  | -3.41215 | 0.10446  | -0.58183 |
| S  | -0.24997 | 2.93401  | 0.60737  |
| Au | -0.28219 | -0.00408 | -0.14314 |

Zero-point correction= 0.365666 (Hartree/Particle)  
 Thermal correction to Energy= 0.398240  
 Thermal correction to Enthalpy= 0.399185  
 Thermal correction to Gibbs Free Energy= 0.300510  
 Sum of electronic and zero-point Energies= -2766.665027  
 Sum of electronic and thermal Energies= -2766.632453  
 Sum of electronic and thermal Enthalpies= -2766.631509  
 Sum of electronic and thermal Free Energies= -2766.730184  
 E(RM06L) = -2767.77499151

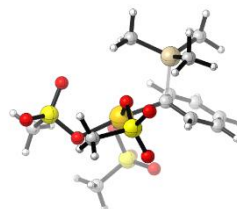

|   |          |          |          |
|---|----------|----------|----------|
| H | -2.28194 | 2.19765  | -1.60905 |
| H | -2.53100 | 3.64831  | -0.58244 |
| H | -1.87860 | 3.83150  | -2.24195 |
| H | -2.72441 | -1.91993 | -1.46727 |
| H | -2.46437 | -3.35451 | -2.52943 |
| H | -2.43241 | -3.52783 | -0.74189 |
| H | -2.94858 | 2.09812  | 1.54218  |
| H | -4.43907 | 1.70924  | 0.61062  |
| H | -4.36794 | 1.37373  | 2.36911  |
| H | 1.71771  | 1.68037  | 1.74668  |
| H | 3.65517  | 2.97327  | 0.94047  |
| H | 4.01759  | 0.34513  | -2.45309 |
| H | 2.03277  | -0.92049 | -1.69820 |
| H | 4.52996  | -1.51548 | 2.67411  |
| H | 4.75332  | -0.35848 | 1.35794  |
| H | 3.92118  | 0.13998  | 2.84451  |
| H | 1.96970  | -3.23459 | -0.13584 |
| H | 3.66804  | -2.70191 | -0.22008 |
| H | 3.09569  | -3.63089 | 1.17060  |
| H | 1.52580  | -2.10168 | 3.53863  |
| H | 0.86875  | -0.49767 | 3.17917  |
| H | 0.20887  | -1.91912 | 2.36025  |
| H | 4.80520  | 2.29222  | -1.14468 |
| C | -1.91226 | 3.19343  | -1.35715 |
| C | -2.20765 | -2.87261 | -1.58424 |
| C | -3.79495 | 1.41623  | 1.44115  |
| C | 2.23433  | 1.37492  | 0.84261  |
| C | 3.32148  | 2.09705  | 0.39640  |
| C | 3.96206  | 1.71018  | -0.78383 |
| C | 3.52770  | 0.60829  | -1.52228 |
| C | 2.42450  | -0.10732 | -1.09380 |
| C | 1.77943  | 0.21070  | 0.14215  |
| C | 4.05617  | -0.68397 | 2.13766  |
| C | 2.81198  | -2.85622 | 0.44589  |
| C | 1.12930  | -1.46534 | 2.73718  |
| O | -0.43846 | 2.02624  | 0.46667  |
| O | -0.17462 | -1.95834 | -0.17000 |
| O | 0.24221  | -3.84760 | -1.64119 |
| O | 0.16186  | 4.30604  | -0.15041 |
| O | -0.14550 | -1.56621 | -2.61586 |

## Supporting Information

|    |          |          |          |
|----|----------|----------|----------|
| O  | 0.57392  | 2.42967  | -1.77043 |
| O  | -2.36240 | 0.01267  | -0.21738 |
| O  | -4.25234 | -1.12287 | 0.87077  |
| O  | -2.19445 | -0.52736 | 2.18596  |
| Si | 2.43810  | -1.30804 | 1.41509  |
| S  | -0.45588 | -2.57214 | -1.60204 |
| S  | -0.24919 | 3.04124  | -0.73300 |
| S  | -3.14527 | -0.21388 | 1.11610  |
| Au | -0.28486 | 0.04876  | 0.04691  |

Zero-point correction= 0.367061 (Hartree/Particle)  
 Thermal correction to Energy= 0.399821  
 Thermal correction to Enthalpy= 0.400765  
 Thermal correction to Gibbs Free Energy= 0.301763  
 Sum of electronic and zero-point Energies= -2766.690405  
 Sum of electronic and thermal Energies= -2766.657645  
 Sum of electronic and thermal Enthalpies= -2766.656701  
 Sum of electronic and thermal Free Energies= -2766.755703  
 E(RM06L) = -2767.79575700

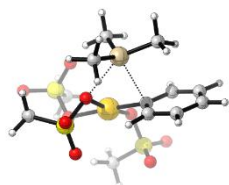

|   |          |          |          |
|---|----------|----------|----------|
| H | 3.20374  | 0.71641  | 1.53014  |
| H | 4.25565  | 1.64546  | 0.41254  |
| H | 3.91548  | 2.28115  | 2.05314  |
| H | 1.07333  | -3.21793 | 1.02083  |
| H | 0.20630  | -4.10588 | 2.32291  |
| H | -0.43939 | -4.11406 | 0.64957  |
| H | 3.59635  | 0.17464  | -1.68701 |
| H | 4.65934  | -0.94793 | -0.76634 |
| H | 4.31829  | -1.25506 | -2.49850 |
| H | -0.43424 | 2.61831  | -1.58121 |
| H | -2.28966 | 4.24059  | -1.45968 |
| H | -4.13607 | 1.93445  | 1.65949  |
| H | -2.27873 | 0.32892  | 1.58018  |
| H | -4.57570 | 0.04478  | -2.68042 |
| H | -4.94705 | 0.68428  | -1.06620 |
| H | -3.70468 | 1.45986  | -2.07742 |
| H | -3.17819 | -3.03348 | -0.29493 |
| H | -4.02342 | -1.87669 | 0.71959  |
| H | -4.70741 | -2.29603 | -0.86784 |
| H | -2.20046 | -1.59547 | -3.29096 |
| H | -1.26238 | -0.14046 | -2.92976 |
| H | -0.79165 | -1.68670 | -2.20437 |
| H | -4.13303 | 3.92206  | 0.17162  |
| C | 3.51596  | 1.71270  | 1.21136  |
| C | 0.09994  | -3.53371 | 1.39915  |
| C | 3.91834  | -0.86112 | -1.56264 |
| C | -1.26382 | 2.44602  | -0.90461 |
| C | -2.30105 | 3.36336  | -0.82009 |
| C | -3.34004 | 3.18432  | 0.10097  |
| C | -3.34645 | 2.07476  | 0.92802  |

|    |          |          |          |
|----|----------|----------|----------|
| C  | -2.31064 | 1.13072  | 0.85129  |
| C  | -1.26031 | 1.33031  | -0.05896 |
| C  | -4.14062 | 0.50433  | -1.78009 |
| C  | -3.77490 | -2.12027 | -0.31584 |
| C  | -1.64387 | -1.07106 | -2.49905 |
| O  | 1.56776  | 1.62396  | -0.54853 |
| O  | -0.99970 | -1.38414 | 0.35028  |
| O  | -2.19510 | -2.49003 | 2.19624  |
| O  | 2.54681  | 3.80151  | -0.08169 |
| O  | -0.09272 | -1.20545 | 2.65437  |
| O  | 1.11070  | 2.68642  | 1.65940  |
| O  | 2.02872  | -1.15994 | 0.20317  |
| O  | 2.90437  | -3.19638 | -0.84705 |
| O  | 1.47558  | -1.61051 | -2.15833 |
| Si | -2.89041 | -0.73692 | -1.17211 |
| S  | -0.85721 | -2.08913 | 1.79019  |
| S  | 2.09582  | 2.59761  | 0.59111  |
| S  | 2.48742  | -1.82686 | -1.11377 |
| Au | 0.34223  | 0.12840  | 0.00878  |

Zero-point correction= 0.366755 (Hartree/Particle)  
 Thermal correction to Energy= 0.398905  
 Thermal correction to Enthalpy= 0.399849  
 Thermal correction to Gibbs Free Energy= 0.301974  
 Sum of electronic and zero-point Energies= -2766.677484  
 Sum of electronic and thermal Energies= -2766.645334  
 Sum of electronic and thermal Enthalpies= -2766.644390  
 Sum of electronic and thermal Free Energies= -2766.742265  
 E(RM06L) = -2767.78648999

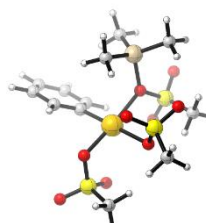

|   |          |          |          |
|---|----------|----------|----------|
| H | 2.98101  | -2.21426 | 0.65702  |
| H | 4.30350  | -1.83581 | -0.50401 |
| H | 4.63535  | -1.83932 | 1.25928  |
| H | -0.89402 | -2.23975 | 1.98924  |
| H | -2.28267 | -2.18343 | 3.14964  |
| H | -2.55729 | -2.43779 | 1.38040  |
| H | 2.03482  | -4.09181 | -1.03483 |
| H | 0.88754  | -4.85530 | 0.11707  |
| H | 0.64466  | -5.03981 | -1.64851 |
| H | 1.38267  | 1.98340  | -2.23324 |
| H | 1.12485  | 4.41351  | -2.64736 |
| H | 0.07980  | 5.86495  | -0.92576 |
| H | -0.70149 | 4.88244  | 1.21592  |
| H | -0.47861 | 2.45087  | 1.62582  |
| H | -4.22479 | 2.30729  | -1.41655 |
| H | -4.16079 | 2.00775  | 0.33546  |
| H | -2.77409 | 2.74434  | -0.49891 |
| H | -4.73870 | -1.06181 | -1.69338 |
| H | -3.46391 | -2.05289 | -0.95969 |

## Supporting Information

|   |          |          |          |
|---|----------|----------|----------|
| H | -4.60299 | -1.13341 | 0.07171  |
| H | -2.56593 | 0.32819  | -3.35209 |
| H | -1.23212 | 1.21534  | -2.60364 |
| H | -1.22909 | -0.57105 | -2.61988 |
| C | 3.89149  | -1.63720 | 0.48634  |
| C | -1.93728 | -1.95908 | 2.13807  |
| C | 0.99673  | -4.37627 | -0.85693 |
| C | 0.89792  | 2.61606  | -1.49751 |
| C | 0.75979  | 3.98528  | -1.71902 |
| C | 0.17633  | 4.79799  | -0.75047 |
| C | -0.26536 | 4.24912  | 0.44957  |
| C | -0.14628 | 2.87855  | 0.68642  |
| C | 0.41448  | 2.09175  | -0.30786 |
| C | -3.57535 | 2.00198  | -0.58709 |
| C | -4.02915 | -1.11897 | -0.85920 |
| C | -1.85658 | 0.32107  | -2.51370 |
| O | 2.40008  | 0.21179  | -0.59857 |
| O | -1.62745 | 0.01520  | 0.36357  |
| O | -3.43730 | 0.22681  | 2.05948  |
| O | 4.61435  | 0.88582  | 0.20161  |
| O | -1.01757 | 0.44562  | 2.73165  |
| O | 2.79375  | 0.32700  | 1.85566  |

|    |          |          |          |
|----|----------|----------|----------|
| O  | 0.57141  | -2.08476 | 0.27381  |
| O  | -1.39253 | -3.29649 | -0.61945 |
| O  | 0.23803  | -2.22333 | -2.16884 |
| Si | -2.85712 | 0.32232  | -0.94739 |
| S  | -2.05807 | -0.20159 | 1.96425  |
| S  | 3.46415  | 0.09231  | 0.58374  |
| S  | -0.00647 | -2.90287 | -0.89379 |
| Au | 0.48526  | 0.09971  | -0.04646 |

Zero-point correction= 0.367012 (Hartree/Particle)

Thermal correction to Energy= 0.399978

Thermal correction to Enthalpy= 0.400923

Thermal correction to Gibbs Free Energy= 0.300710

Sum of electronic and zero-point Energies= -2766.739062

Sum of electronic and thermal Energies= -2766.706096

Sum of electronic and thermal Enthalpies= -2766.705151

Sum of electronic and thermal Free Energies= -2766.805364

E(RM06L) = -2767.84006887

## Bond Activation with Au<sup>0</sup>

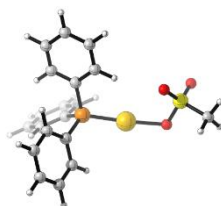

|    |          |          |          |
|----|----------|----------|----------|
| H  | 2.75358  | 0.01769  | -2.45291 |
| H  | 1.15648  | -2.84939 | 0.33111  |
| H  | 3.90466  | -1.80319 | -3.65959 |
| H  | 2.32254  | -4.66451 | -0.87297 |
| H  | 3.69847  | -4.14616 | -2.87346 |
| H  | -0.94806 | 1.36718  | -1.66770 |
| H  | 3.16028  | 1.99405  | -0.49381 |
| H  | -0.84557 | 3.38575  | -3.06369 |
| H  | 3.24380  | 4.02163  | -1.90174 |
| H  | 1.24370  | 4.72189  | -3.19276 |
| H  | 0.55287  | 1.32406  | 2.50741  |
| H  | 3.87734  | -0.64482 | 0.60930  |
| H  | 1.98181  | 1.85449  | 4.45198  |
| H  | 5.29791  | -0.11674 | 2.56063  |
| H  | 4.35700  | 1.13365  | 4.48461  |
| H  | -5.84677 | -1.37491 | 0.41244  |
| H  | -6.08661 | -0.37618 | -1.05498 |
| H  | -4.95496 | -1.76621 | -1.09488 |
| C  | 1.89146  | -1.29352 | -0.97225 |
| C  | 2.66360  | -1.00449 | -2.09905 |
| C  | 1.76915  | -2.61810 | -0.53689 |
| C  | 3.31138  | -2.03252 | -2.77984 |
| C  | 2.42302  | -3.63937 | -1.21528 |
| C  | 3.19448  | -3.34695 | -2.33857 |
| C  | 1.11388  | 1.52733  | -1.00800 |
| C  | -0.01719 | 1.92751  | -1.72871 |
| C  | 2.28723  | 2.28861  | -1.06977 |
| C  | 0.03752  | 3.07544  | -2.51475 |
| C  | 2.33325  | 3.43191  | -1.85891 |
| C  | 1.20847  | 3.82414  | -2.58284 |
| C  | 2.12473  | 0.31460  | 1.42600  |
| C  | 1.59523  | 1.01511  | 2.51504  |
| C  | 3.46139  | -0.09175 | 1.44629  |
| C  | 2.39911  | 1.31247  | 3.60929  |
| C  | 4.26108  | 0.20497  | 2.54684  |
| C  | 3.73205  | 0.90671  | 3.62624  |
| C  | -5.37107 | -0.96699 | -0.48036 |
| O  | -3.14467 | -0.85946 | 0.81397  |
| O  | -4.60891 | 1.14773  | 0.88662  |
| O  | -3.35438 | 0.56558  | -1.19590 |
| P  | 1.04734  | 0.00511  | -0.01111 |
| S  | -4.04457 | 0.11804  | 0.02330  |
| Au | -1.10778 | -0.50487 | 0.49140  |

Zero-point correction= 0.332574 (Hartree/Particle)

Thermal correction to Energy= 0.356946

Thermal correction to Enthalpy= 0.357890

Thermal correction to Gibbs Free Energy= 0.271766

Sum of electronic and zero-point Energies= -1834.846443

Sum of electronic and thermal Energies= -1834.822071

Sum of electronic and thermal Enthalpies= -1834.821127

Sum of electronic and thermal Free Energies= -1834.907251

E(RM06L) = -1835.72401779

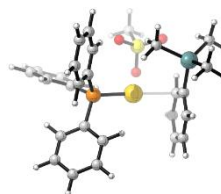

|   |          |          |          |
|---|----------|----------|----------|
| H | -1.78391 | 2.04524  | -1.59110 |
| H | -4.26228 | 0.47422  | 1.56183  |
| H | -3.35515 | 3.92573  | -1.87747 |
| H | -5.81897 | 2.37313  | 1.28205  |
| H | -5.37327 | 4.09940  | -0.44444 |
| H | -4.67594 | -0.98318 | -0.46812 |
| H | -0.81465 | -2.86461 | -0.71368 |
| H | -5.73410 | -3.05336 | -1.28984 |
| H | -1.88448 | -4.94641 | -1.50975 |
| H | -4.34808 | -5.04502 | -1.80549 |
| H | -0.71321 | 1.33416  | 2.19668  |
| H | -2.65920 | -2.50650 | 1.99086  |
| H | -0.53000 | 1.09642  | 4.65261  |
| H | -2.45058 | -2.74264 | 4.44164  |
| H | -1.39089 | -0.94306 | 5.77984  |
| H | 2.71556  | 0.94040  | -1.33218 |
| H | 3.07887  | -3.26426 | -0.46774 |
| H | 1.63911  | 0.40016  | -3.48514 |
| H | 2.13063  | -3.79737 | -2.67445 |
| H | 1.35540  | -1.98545 | -4.18299 |
| H | 5.00150  | -2.05668 | 2.73608  |
| H | 3.75065  | -3.05139 | 1.97775  |
| H | 5.25012  | -2.68276 | 1.09718  |
| H | 4.45282  | 1.66595  | 0.43718  |
| H | 5.49728  | 1.00820  | 1.71514  |
| H | 5.72686  | 0.48085  | 0.03438  |
| H | 1.79136  | 0.87523  | 1.80904  |
| H | 1.42681  | -0.80742 | 2.25943  |
| H | 2.56755  | 0.14573  | 3.23054  |
| H | 1.10132  | 5.37028  | 0.27073  |
| H | 1.32751  | 5.16165  | -1.49424 |
| H | -0.30511 | 4.98950  | -0.77091 |
| C | -2.95689 | 1.09994  | -0.04153 |
| C | -2.69240 | 2.08509  | -0.99607 |
| C | -4.07924 | 1.21496  | 0.78764  |
| C | -3.56784 | 3.15845  | -1.13940 |
| C | -4.95014 | 2.28752  | 0.63656  |
| C | -4.69658 | 3.25739  | -0.33189 |
| C | -2.67564 | -1.79093 | -0.51456 |
| C | -4.06073 | -1.85025 | -0.68570 |
| C | -1.89604 | -2.91270 | -0.82220 |
| C | -4.65777 | -3.01880 | -1.15167 |
| C | -2.49728 | -4.08130 | -1.27557 |

## Supporting Information

|    |          |          |          |   |          |          |          |
|----|----------|----------|----------|---|----------|----------|----------|
| C  | -3.87947 | -4.13539 | -1.44199 | H | -3.01541 | -0.56168 | -1.90822 |
| C  | -1.71182 | -0.56654 | 1.94248  | H | -2.27592 | 3.19591  | 0.04808  |
| C  | -1.11055 | 0.45111  | 2.69397  | H | -5.18618 | 0.29752  | -2.71378 |
| C  | -2.19401 | -1.71556 | 2.57145  | H | -4.44562 | 4.04116  | -0.74328 |
| C  | -1.00246 | 0.31004  | 4.07233  | H | -5.92580 | 2.58911  | -2.11130 |
| C  | -2.07650 | -1.84772 | 3.95334  | H | -1.97879 | 1.43428  | 3.56282  |
| C  | -1.48295 | -0.83649 | 4.70288  | H | -0.70356 | 1.86154  | 2.40449  |
| C  | 2.90720  | -1.12979 | -0.68600 | H | -2.38004 | 2.39708  | 2.12055  |
| C  | 2.49851  | -0.10083 | -1.57157 | H | -4.42849 | -1.10834 | 0.94423  |
| C  | 2.75876  | -2.45159 | -1.11497 | H | -4.48219 | -0.38206 | 2.57724  |
| C  | 1.92485  | -0.41156 | -2.82235 | H | -4.54080 | 0.66328  | 1.13362  |
| C  | 2.21882  | -2.75918 | -2.36624 | H | -0.34724 | -1.83996 | 2.07846  |
| C  | 1.78539  | -1.74711 | -3.21526 | H | -0.89510 | -1.07156 | 3.59604  |
| C  | 4.50277  | -2.27851 | 1.78737  | H | -1.88197 | -2.34111 | 2.79613  |
| C  | 4.98018  | 0.77038  | 0.78006  | H | -1.87363 | -4.67476 | 0.31578  |
| C  | 2.21639  | -0.05053 | 2.21211  | H | -2.84026 | -4.36584 | -1.16276 |
| C  | 0.76458  | 4.83477  | -0.61855 | H | -1.14991 | -4.94346 | -1.30166 |
| O  | 0.56774  | 2.44360  | -1.63557 | C | 2.65355  | -0.78461 | -1.33537 |
| O  | 2.50033  | 2.91158  | -0.16881 | C | 1.92687  | -1.44069 | -2.33101 |
| O  | 0.22343  | 2.70591  | 0.79740  | C | 4.04858  | -0.89951 | -1.29819 |
| P  | -1.82471 | -0.31285 | 0.14104  | C | 2.59796  | -2.20577 | -3.28263 |
| S  | 1.05017  | 3.08608  | -0.36887 | C | 4.71011  | -1.66770 | -2.24740 |
| Ge | 3.67580  | -0.65309 | 1.06451  | C | 3.98311  | -2.32057 | -3.24269 |
| Au | 0.22382  | 0.01722  | -0.85640 | C | 2.71957  | 1.80444  | -0.06838 |

Zero-point correction= 0.538366 (Hartree/Particle)

Thermal correction to Energy= 0.576884

Thermal correction to Enthalpy= 0.577828

Thermal correction to Gibbs Free Energy= 0.461391

Sum of electronic and zero-point Energies= -4260.714658

Sum of electronic and thermal Energies= -4260.676140

Sum of electronic and thermal Enthalpies= -4260.675195

Sum of electronic and thermal Free Energies= -4260.791632

E(RM06L) = -4264.09226695

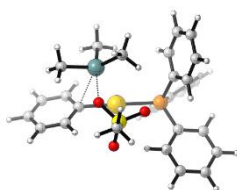

|   |         |          |          |    |          |          |          |
|---|---------|----------|----------|----|----------|----------|----------|
| H | 0.84239 | -1.38919 | -2.35644 | C  | 3.85929  | 1.98748  | 0.72160  |
| H | 4.62061 | -0.38613 | -0.53052 | C  | 2.30047  | 2.84094  | -0.90907 |
| H | 2.02535 | -2.71706 | -4.04993 | C  | 4.56584  | 3.18508  | 0.66876  |
| H | 5.79198 | -1.75439 | -2.21391 | C  | 3.01090  | 4.03580  | -0.96456 |
| H | 4.50130 | -2.91939 | -3.98620 | C  | 4.14406  | 4.20967  | -0.17465 |
| H | 4.18925 | 1.19887  | 1.39161  | C  | 2.09788  | -0.52502 | 1.52749  |
| H | 1.41258 | 2.71580  | -1.52451 | C  | 2.42765  | -1.87531 | 1.64508  |
| H | 5.44672 | 3.31761  | 1.28970  | C  | 1.89541  | 0.24316  | 2.67963  |
| H | 2.67417 | 4.83223  | -1.62095 | C  | 2.56283  | -2.44679 | 2.90771  |
| H | 4.69565 | 5.14422  | -0.21280 | C  | 2.03752  | -0.33044 | 3.93716  |
| H | 2.54386 | -2.48449 | 0.75591  | C  | 2.37026  | -1.67890 | 4.05194  |
| H | 1.63343 | 1.29466  | 2.59398  | C  | -2.48595 | 1.24457  | -0.86095 |
| H | 2.81134 | -3.50001 | 2.99355  | C  | -3.32382 | 0.44606  | -1.65306 |
| H | 1.88229 | 0.27318  | 4.82632  | C  | -2.90945 | 2.54652  | -0.55013 |
| H | 2.47439 | -2.13062 | 5.03397  | C  | -4.54898 | 0.93181  | -2.10359 |
|   |         |          |          | C  | -4.13622 | 3.03070  | -0.99698 |
|   |         |          |          | C  | -4.96357 | 2.21824  | -1.76889 |
|   |         |          |          | C  | -1.75675 | 1.58513  | 2.49778  |
|   |         |          |          | C  | -4.12113 | -0.25601 | 1.54883  |
|   |         |          |          | C  | -1.21626 | -1.48882 | 2.63693  |
|   |         |          |          | C  | -1.84352 | -4.33348 | -0.72024 |
|   |         |          |          | O  | -1.25816 | -2.21398 | -2.15620 |
|   |         |          |          | O  | -2.29189 | -1.90810 | 0.06484  |
|   |         |          |          | O  | 0.06827  | -2.64827 | -0.10436 |
|   |         |          |          | P  | 1.78113  | 0.23039  | -0.10022 |
|   |         |          |          | S  | -1.25880 | -2.64364 | -0.74785 |
|   |         |          |          | Ge | -2.18325 | -0.13526 | 1.62142  |
|   |         |          |          | Au | -0.55303 | 0.66217  | -0.46542 |

Zero-point correction= 0.537710 (Hartree/Particle)

Thermal correction to Energy= 0.575371

Thermal correction to Enthalpy= 0.576315

Thermal correction to Gibbs Free Energy= 0.464820

## Supporting Information

Sum of electronic and zero-point Energies= -4260.681704  
 Sum of electronic and thermal Energies= -4260.644043  
 Sum of electronic and thermal Enthalpies= -4260.643099  
 Sum of electronic and thermal Free Energies= -4260.754595  
 E(RM06L) = -4264.07124623

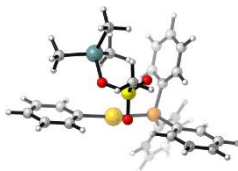

|   |          |          |          |
|---|----------|----------|----------|
| H | 0.80022  | -1.09107 | -2.31565 |
| H | 4.59035  | -1.55527 | -0.31938 |
| H | 1.47109  | -2.77847 | -3.97333 |
| H | 5.25228  | -3.25290 | -1.98153 |
| H | 3.69930  | -3.87298 | -3.81523 |
| H | 4.46720  | -0.21630 | 1.83331  |
| H | 2.91161  | 2.54851  | -1.06998 |
| H | 6.45917  | 1.21266  | 2.12522  |
| H | 4.90984  | 3.97511  | -0.77713 |
| H | 6.68859  | 3.31194  | 0.82230  |
| H | 1.62310  | -2.84259 | 0.61753  |
| H | 1.94287  | 0.84901  | 2.80007  |
| H | 1.07810  | -4.02828 | 2.71222  |
| H | 1.40576  | -0.34206 | 4.89473  |
| H | 0.96690  | -2.78707 | 4.85813  |
| H | -2.29991 | 1.23010  | -2.38899 |
| H | -1.32763 | 3.58301  | 1.07562  |
| H | -4.40107 | 2.47831  | -2.64006 |
| H | -3.43846 | 4.81262  | 0.83206  |
| H | -4.99481 | 4.27758  | -1.03104 |
| H | -1.91101 | -0.55212 | 3.24894  |
| H | -0.90099 | -0.96061 | 1.84510  |
| H | -1.47233 | 0.71282  | 2.06825  |
| H | -5.44736 | 0.35669  | 0.37583  |
| H | -5.13508 | 0.74604  | 2.08422  |
| H | -4.20479 | 1.55578  | 0.79819  |
| H | -3.22769 | -3.28063 | 1.59886  |
| H | -4.35209 | -2.51342 | 2.73440  |
| H | -4.86987 | -2.81952 | 1.06614  |
| H | -3.46451 | -3.75547 | -0.90213 |
| H | -3.77172 | -2.93005 | -2.46766 |
| H | -2.38687 | -4.05511 | -2.30104 |
| C | 2.64885  | -1.20894 | -1.20396 |
| C | 1.77900  | -1.55428 | -2.23998 |
| C | 3.90277  | -1.82524 | -1.11566 |
| C | 2.15799  | -2.51519 | -3.17504 |
| C | 4.27724  | -2.78012 | -2.05263 |
| C | 3.40343  | -3.12676 | -3.08341 |
| C | 3.56468  | 1.05939  | 0.34480  |
| C | 4.56767  | 0.69406  | 1.24899  |
| C | 3.69567  | 2.24884  | -0.37913 |
| C | 5.68736  | 1.50245  | 1.41843  |
| C | 4.81885  | 3.05302  | -0.21138 |
| C | 5.81534  | 2.68073  | 0.68688  |
| C | 1.85360  | -0.92534 | 1.57374  |

|    |          |          |          |
|----|----------|----------|----------|
| C  | 1.60061  | -2.29727 | 1.55479  |
| C  | 1.77183  | -0.22434 | 2.78301  |
| C  | 1.28144  | -2.96208 | 2.73687  |
| C  | 1.46329  | -0.89314 | 3.96088  |
| C  | 1.21597  | -2.26507 | 3.93887  |
| C  | -1.62461 | 2.30661  | -0.64434 |
| C  | -2.52789 | 2.02440  | -1.68393 |
| C  | -1.99051 | 3.32569  | 0.25189  |
| C  | -3.72498 | 2.72415  | -1.82457 |
| C  | -3.18821 | 4.02954  | 0.11998  |
| C  | -4.06105 | 3.73174  | -0.92324 |
| C  | -1.73151 | -0.34086 | 2.18888  |
| C  | -4.67148 | 0.61467  | 1.10087  |
| C  | -4.01964 | -2.53105 | 1.69125  |
| C  | -3.00864 | -3.31705 | -1.79113 |
| O  | -1.42767 | -1.36130 | -2.51459 |
| O  | -2.97094 | -0.97850 | -0.65397 |
| O  | -1.01485 | -2.46367 | -0.29584 |
| P  | 2.09555  | 0.01724  | 0.02715  |
| S  | -1.95112 | -1.96538 | -1.29959 |
| Ge | -3.32947 | -0.77660 | 1.18684  |
| Au | 0.11687  | 1.25416  | -0.42932 |

Zero-point correction= 0.537908 (Hartree/Particle)

Thermal correction to Energy= 0.576480

Thermal correction to Enthalpy= 0.577424

Thermal correction to Gibbs Free Energy= 0.461971

Sum of electronic and zero-point Energies= -4260.722862

Sum of electronic and thermal Energies= -4260.684290

Sum of electronic and thermal Enthalpies= -4260.683346

Sum of electronic and thermal Free Energies= -4260.798799

E(RM06L) = -4264.10023022

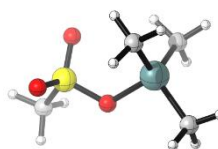

|   |          |          |          |
|---|----------|----------|----------|
| H | 2.20962  | 2.09156  | -1.03382 |
| H | 0.56783  | 1.76466  | -1.64676 |
| H | 3.41687  | -0.02210 | 1.35398  |
| H | 2.24103  | -1.14499 | 2.06685  |
| H | 1.52195  | -2.41743 | -0.78933 |
| H | 0.77988  | -1.39456 | -2.04429 |
| H | 2.07350  | 0.60416  | 2.33430  |
| H | 0.78552  | 2.47116  | -0.03389 |
| H | 2.53714  | -1.32547 | -1.75500 |
| H | -3.86528 | -0.85297 | 0.20410  |
| H | -2.56607 | -2.07617 | 0.37896  |
| H | -2.93392 | -0.95063 | 1.73137  |
| C | 1.20194  | 1.76528  | -0.75707 |
| C | 2.36093  | -0.16006 | 1.60760  |
| C | 1.55802  | -1.44032 | -1.27885 |
| C | -2.89246 | -1.07117 | 0.64826  |
| O | -1.55912 | -0.14694 | -1.44040 |
| O | -0.43173 | -0.34950 | 0.75284  |



## Supporting Information

|    |          |          |          |
|----|----------|----------|----------|
| O  | -2.12012 | 1.43930  | 0.41502  |
| S  | -1.73259 | 0.10693  | -0.01425 |
| Ge | 1.26470  | -0.01760 | 0.01007  |

Zero-point correction= 0.165534 (Hartree/Particle)  
 Thermal correction to Energy= 0.179361  
 Thermal correction to Enthalpy= 0.180305  
 Thermal correction to Gibbs Free Energy= 0.124267  
 Sum of electronic and zero-point Energies= -2857.968049  
 Sum of electronic and thermal Energies= -2857.954222  
 Sum of electronic and thermal Enthalpies= -2857.953278  
 Sum of electronic and thermal Free Energies= -2858.009316  
 E(RM06L) = -2860.50716276

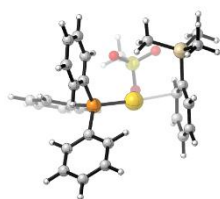

|   |          |          |          |
|---|----------|----------|----------|
| H | -1.39158 | 2.05221  | -1.66743 |
| H | -4.09312 | 0.73436  | 1.41793  |
| H | -2.81259 | 4.03114  | -2.05475 |
| H | -5.49724 | 2.73214  | 1.03880  |
| H | -4.86455 | 4.38203  | -0.70372 |
| H | -4.51949 | -0.72659 | -0.64197 |
| H | -0.79695 | -2.88279 | -0.67073 |
| H | -5.68094 | -2.72546 | -1.50225 |
| H | -1.97165 | -4.89178 | -1.50634 |
| H | -4.41729 | -4.81675 | -1.92983 |
| H | -0.51480 | 1.30864  | 2.20935  |
| H | -2.78460 | -2.34424 | 1.92765  |
| H | -0.47561 | 1.08073  | 4.67311  |
| H | -2.72385 | -2.57099 | 4.38786  |
| H | -1.57365 | -0.86030 | 5.76725  |
| H | 3.02634  | 0.72993  | -1.09227 |
| H | 3.16896  | -3.46743 | -0.11175 |
| H | 2.03302  | 0.17965  | -3.27706 |
| H | 2.30271  | -4.01344 | -2.34688 |
| H | 1.67381  | -2.20921 | -3.93018 |
| H | 4.93442  | -2.17242 | 3.09227  |
| H | 3.71650  | -3.17466 | 2.29882  |
| H | 5.27037  | -2.86416 | 1.49897  |
| H | 4.62320  | 1.37524  | 0.70725  |
| H | 5.54410  | 0.71551  | 2.06912  |
| H | 5.87672  | 0.14084  | 0.42478  |
| H | 1.96177  | 0.73355  | 1.93626  |
| H | 1.52180  | -0.91677 | 2.41961  |
| H | 2.67201  | 0.01680  | 3.39350  |
| H | 1.42045  | 5.24970  | 0.30785  |
| H | 1.66048  | 5.05250  | -1.45667 |
| H | 0.02812  | 4.84063  | -0.74210 |
| C | -2.68509 | 1.22965  | -0.14368 |
| C | -2.31608 | 2.17047  | -1.10849 |
| C | -3.82727 | 1.44261  | 0.63741  |
| C | -3.10645 | 3.29935  | -1.30848 |

|    |          |          |          |
|----|----------|----------|----------|
| C  | -4.61282 | 2.57050  | 0.43009  |
| C  | -4.25446 | 3.49722  | -0.54731 |
| C  | -2.58333 | -1.67652 | -0.57873 |
| C  | -3.95845 | -1.63816 | -0.82121 |
| C  | -1.87180 | -2.85462 | -0.83613 |
| C  | -4.61342 | -2.76629 | -1.30856 |
| C  | -2.53154 | -3.98225 | -1.31133 |
| C  | -3.90363 | -3.93895 | -1.54935 |
| C  | -1.66356 | -0.49891 | 1.91602  |
| C  | -1.01206 | 0.46887  | 2.69112  |
| C  | -2.27992 | -1.59230 | 2.52682  |
| C  | -0.98696 | 0.33368  | 4.07413  |
| C  | -2.24559 | -1.71913 | 3.91374  |
| C  | -1.60098 | -0.75772 | 4.68634  |
| C  | 3.09635  | -1.33147 | -0.38077 |
| C  | 2.77361  | -0.30792 | -1.31156 |
| C  | 2.91378  | -2.65648 | -0.78935 |
| C  | 2.24558  | -0.62582 | -2.57990 |
| C  | 2.41913  | -2.97244 | -2.05830 |
| C  | 2.06760  | -1.96566 | -2.94843 |
| C  | 4.48756  | -2.41566 | 2.12133  |
| C  | 5.08224  | 0.46332  | 1.10713  |
| C  | 2.34839  | -0.19836 | 2.36780  |
| C  | 1.10049  | 4.70998  | -0.58506 |
| O  | 0.96142  | 2.31788  | -1.61140 |
| O  | 2.87295  | 2.82020  | -0.12730 |
| O  | 0.59196  | 2.56562  | 0.81788  |
| Si | 3.77006  | -0.85809 | 1.33431  |
| P  | -1.66438 | -0.25568 | 0.10957  |
| S  | 1.42243  | 2.96683  | -0.34087 |
| Au | 0.45330  | -0.07204 | -0.77559 |

Zero-point correction= 0.539159 (Hartree/Particle)  
 Thermal correction to Energy= 0.577175  
 Thermal correction to Enthalpy= 0.578120  
 Thermal correction to Gibbs Free Energy= 0.463191  
 Sum of electronic and zero-point Energies= -2475.443613  
 Sum of electronic and thermal Energies= -2475.405597  
 Sum of electronic and thermal Enthalpies= -2475.404653  
 Sum of electronic and thermal Free Energies= -2475.519582  
 E(RM06L) = -2476.69856075

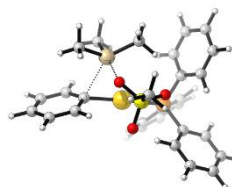

|   |         |          |          |
|---|---------|----------|----------|
| H | 0.59520 | -1.43714 | -2.25262 |
| H | 4.49496 | -0.44446 | -0.69356 |
| H | 1.64999 | -2.82496 | -3.97974 |
| H | 5.53881 | -1.87040 | -2.41330 |
| H | 4.12249 | -3.06124 | -4.06842 |
| H | 4.18119 | 1.14954  | 1.28235  |
| H | 1.31540 | 2.68422  | -1.53591 |
| H | 5.47688 | 3.24154  | 1.09768  |

## Supporting Information

|    |          |          |          |
|----|----------|----------|----------|
| H  | 2.61552  | 4.77409  | -1.71615 |
| H  | 4.70027  | 5.06201  | -0.39873 |
| H  | 2.45933  | -2.50679 | 0.75330  |
| H  | 1.63937  | 1.29375  | 2.59180  |
| H  | 2.77913  | -3.51158 | 2.98940  |
| H  | 1.95496  | 0.28534  | 4.82321  |
| H  | 2.52536  | -2.12313 | 5.02847  |
| H  | -3.19664 | -0.57666 | -1.63141 |
| H  | -2.32126 | 3.14244  | 0.34231  |
| H  | -5.22067 | 0.43325  | -2.61385 |
| H  | -4.33850 | 4.14446  | -0.63917 |
| H  | -5.81962 | 2.78617  | -2.09951 |
| H  | -2.19597 | 1.34369  | 3.65858  |
| H  | -1.06644 | 1.98848  | 2.46327  |
| H  | -2.80086 | 2.36013  | 2.34218  |
| H  | -4.57731 | -1.15779 | 1.19907  |
| H  | -4.49259 | -0.41794 | 2.81851  |
| H  | -4.74763 | 0.60438  | 1.39099  |
| H  | -0.47380 | -1.66073 | 2.09885  |
| H  | -0.95042 | -0.78977 | 3.57644  |
| H  | -1.95046 | -2.12180 | 2.92927  |
| H  | -2.14117 | -4.55390 | 0.64041  |
| H  | -3.15830 | -4.27879 | -0.81081 |
| H  | -1.50501 | -4.94748 | -0.98865 |
| C  | 2.47565  | -0.83553 | -1.36126 |
| C  | 1.67823  | -1.50494 | -2.29193 |
| C  | 3.86878  | -0.96898 | -1.40981 |
| C  | 2.27727  | -2.30325 | -3.26399 |
| C  | 4.45821  | -1.76951 | -2.37957 |
| C  | 3.66059  | -2.43673 | -3.30914 |
| C  | 2.66657  | 1.76742  | -0.12506 |
| C  | 3.84107  | 1.93622  | 0.61507  |
| C  | 2.23177  | 2.80035  | -0.96190 |
| C  | 4.56863  | 3.11829  | 0.51554  |
| C  | 2.96336  | 3.97911  | -1.06383 |
| C  | 4.13229  | 4.13954  | -0.32442 |
| C  | 2.06718  | -0.53586 | 1.52622  |
| C  | 2.37973  | -1.88993 | 1.64143  |
| C  | 1.90556  | 0.24311  | 2.67765  |
| C  | 2.54485  | -2.45513 | 2.90336  |
| C  | 2.07952  | -0.32429 | 3.93343  |
| C  | 2.39874  | -1.67637 | 4.04685  |
| C  | -2.61741 | 1.19173  | -0.54485 |
| C  | -3.44653 | 0.45244  | -1.40408 |
| C  | -2.95542 | 2.53456  | -0.29546 |
| C  | -4.58817 | 1.02527  | -1.95848 |
| C  | -4.09518 | 3.10672  | -0.84968 |
| C  | -4.92156 | 2.34614  | -1.67458 |
| C  | -2.07649 | 1.58127  | 2.59214  |
| C  | -4.23246 | -0.28820 | 1.75893  |
| C  | -1.32107 | -1.26510 | 2.66250  |
| C  | -2.14212 | -4.27296 | -0.41392 |
| O  | -1.52462 | -2.25834 | -1.98683 |
| O  | -2.45346 | -1.79825 | 0.25118  |
| O  | -0.12831 | -2.65242 | 0.02576  |
| Si | -2.37206 | -0.06096 | 1.65708  |
| P  | 1.70013  | 0.21334  | -0.09202 |

|    |          |          |          |
|----|----------|----------|----------|
| S  | -1.47919 | -2.61972 | -0.56086 |
| Au | -0.62882 | 0.63367  | -0.28857 |

Zero-point correction= 0.539317 (Hartree/Particle)  
 Thermal correction to Energy= 0.576221  
 Thermal correction to Enthalpy= 0.577165  
 Thermal correction to Gibbs Free Energy= 0.467604  
 Sum of electronic and zero-point Energies= -2475.401364  
 Sum of electronic and thermal Energies= -2475.364460  
 Sum of electronic and thermal Enthalpies= -2475.363516  
 Sum of electronic and thermal Free Energies= -2475.473077  
 E(RM06L) = -2476.66465502

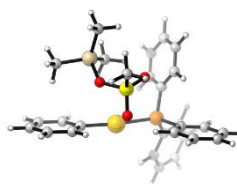

|   |          |          |          |
|---|----------|----------|----------|
| H | 0.57188  | -1.10839 | -2.28347 |
| H | 4.42731  | -1.46991 | -0.39709 |
| H | 1.23417  | -2.79305 | -3.95085 |
| H | 5.08056  | -3.16491 | -2.06610 |
| H | 3.48998  | -3.83413 | -3.84965 |
| H | 4.35612  | -0.06559 | 1.73180  |
| H | 2.61102  | 2.57390  | -1.18044 |
| H | 6.31364  | 1.42845  | 1.91084  |
| H | 4.57461  | 4.06567  | -1.00049 |
| H | 6.43107  | 3.49761  | 0.54651  |
| H | 1.63263  | -2.82314 | 0.68033  |
| H | 1.78735  | 0.93750  | 2.76027  |
| H | 1.23563  | -3.98545 | 2.82117  |
| H | 1.39923  | -0.22971 | 4.90089  |
| H | 1.11780  | -2.69766 | 4.93888  |
| H | -2.60534 | 1.04806  | -2.25048 |
| H | -1.58508 | 3.54256  | 1.09939  |
| H | -4.77126 | 2.19320  | -2.43632 |
| H | -3.75864 | 4.66915  | 0.92124  |
| H | -5.37314 | 4.00952  | -0.84987 |
| H | -2.04011 | -0.56601 | 3.39353  |
| H | -1.01321 | -1.11452 | 2.05525  |
| H | -1.57737 | 0.56697  | 2.10392  |
| H | -5.57074 | 0.04759  | 0.76258  |
| H | -5.07238 | 0.52150  | 2.39922  |
| H | -4.32055 | 1.28476  | 0.98256  |
| H | -3.20514 | -3.38548 | 1.89648  |
| H | -4.29975 | -2.57395 | 3.02076  |
| H | -4.86713 | -2.98020 | 1.39571  |
| H | -3.50545 | -3.94139 | -0.55549 |
| H | -3.97992 | -3.10633 | -2.07481 |
| H | -2.55954 | -4.19895 | -2.05505 |
| C | 2.45343  | -1.17629 | -1.22619 |
| C | 1.56234  | -1.54979 | -2.23409 |
| C | 3.72361  | -1.76229 | -1.17115 |
| C | 1.93655  | -2.50790 | -3.17381 |
| C | 4.09307  | -2.71548 | -2.11188 |

## Supporting Information

|    |          |          |          |
|----|----------|----------|----------|
| C  | 3.19814  | -3.08981 | -3.11433 |
| C  | 3.36121  | 1.14279  | 0.24608  |
| C  | 4.40735  | 0.83127  | 1.12081  |
| C  | 3.42903  | 2.31581  | -0.51253 |
| C  | 5.50770  | 1.67640  | 1.22657  |
| C  | 4.53274  | 3.15670  | -0.40833 |
| C  | 5.57282  | 2.83780  | 0.46061  |
| C  | 1.76965  | -0.87054 | 1.58102  |
| C  | 1.60512  | -2.25558 | 1.60413  |
| C  | 1.68473  | -0.14466 | 2.77532  |
| C  | 1.37035  | -2.90816 | 2.81266  |
| C  | 1.46067  | -0.80041 | 3.97921  |
| C  | 1.30156  | -2.18536 | 3.99905  |
| C  | -1.90170 | 2.20401  | -0.56886 |
| C  | -2.83707 | 1.85199  | -1.55740 |
| C  | -2.27172 | 3.23275  | 0.31425  |
| C  | -4.07035 | 2.49295  | -1.66073 |
| C  | -3.50524 | 3.87784  | 0.21949  |
| C  | -4.41091 | 3.51000  | -0.77197 |
| C  | -1.85726 | -0.46901 | 2.31600  |
| C  | -4.71479 | 0.34257  | 1.37804  |
| C  | -3.99937 | -2.63313 | 1.96800  |
| C  | -3.14793 | -3.48285 | -1.47845 |
| O  | -1.69568 | -1.47500 | -2.32375 |
| O  | -3.06994 | -1.15318 | -0.32621 |
| O  | -1.04391 | -2.58402 | -0.16516 |
| Si | -3.38616 | -0.95978 | 1.37454  |
| P  | 1.91289  | 0.05068  | 0.01001  |
| S  | -2.07711 | -2.11403 | -1.07751 |
| Au | -0.11719 | 1.21926  | -0.39333 |

Zero-point correction= 0.538607 (Hartree/Particle)  
 Thermal correction to Energy= 0.575898  
 Thermal correction to Enthalpy= 0.576842  
 Thermal correction to Gibbs Free Energy= 0.464909  
 Sum of electronic and zero-point Energies= -2475.460004  
 Sum of electronic and thermal Energies= -2475.422713  
 Sum of electronic and thermal Enthalpies= -2475.421768  
 Sum of electronic and thermal Free Energies= -2475.533702  
 E(RM06L) = -2476.71311568

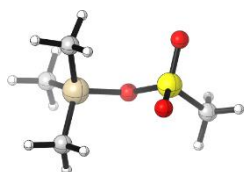

|   |          |          |          |
|---|----------|----------|----------|
| H | -2.51558 | 2.08225  | 0.68907  |
| H | -0.85759 | 1.95600  | 1.30859  |
| H | -3.59472 | -0.24803 | -1.27993 |
| H | -2.42626 | -1.46160 | -1.82637 |
| H | -1.80024 | -2.21241 | 1.12771  |
| H | -1.08825 | -0.99939 | 2.20956  |
| H | -2.27155 | 0.22102  | -2.36266 |
| H | -1.13351 | 2.39630  | -0.38212 |
| H | -2.82337 | -0.94878 | 1.83368  |

|    |          |          |          |
|----|----------|----------|----------|
| H  | 3.58139  | -0.89707 | -0.20435 |
| H  | 2.26534  | -2.11321 | -0.13808 |
| H  | 2.55324  | -1.17512 | -1.64526 |
| C  | -1.49527 | 1.76871  | 0.43861  |
| C  | -2.53733 | -0.41781 | -1.51417 |
| C  | -1.82973 | -1.15720 | 1.41996  |
| C  | 2.58092  | -1.15650 | -0.55528 |
| O  | 1.38200  | 0.04657  | 1.47269  |
| O  | 0.12345  | -0.43286 | -0.61264 |
| O  | 1.82843  | 1.37177  | -0.60893 |
| Si | -1.46588 | -0.03870 | -0.03131 |
| S  | 1.47818  | 0.11468  | 0.02280  |

Zero-point correction= 0.166500 (Hartree/Particle)  
 Thermal correction to Energy= 0.179839  
 Thermal correction to Enthalpy= 0.180783  
 Thermal correction to Gibbs Free Energy= 0.126253  
 Sum of electronic and zero-point Energies= -1072.706871  
 Sum of electronic and thermal Energies= -1072.693532  
 Sum of electronic and thermal Enthalpies= -1072.692588  
 Sum of electronic and thermal Free Energies= -1072.747117  
 E(RM06L) = -1073.12045110

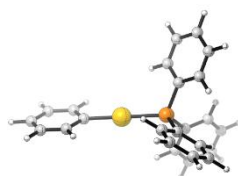

|   |          |          |          |
|---|----------|----------|----------|
| H | -3.41388 | 0.98596  | -1.53243 |
| H | -0.26302 | 2.60831  | 0.90590  |
| H | -4.35813 | 3.25122  | -1.81333 |
| H | -1.22047 | 4.87121  | 0.63323  |
| H | -3.26920 | 5.19883  | -0.73000 |
| H | -0.20070 | -0.60782 | -2.68002 |
| H | -3.47462 | -1.73975 | -0.12876 |
| H | -1.15796 | -1.96894 | -4.50782 |
| H | -4.41902 | -3.10964 | -1.95419 |
| H | -3.26845 | -3.22595 | -4.14874 |
| H | -0.21142 | -2.00217 | 1.89467  |
| H | -3.49582 | 0.75203  | 1.53211  |
| H | -1.19103 | -2.89193 | 3.98271  |
| H | -4.46342 | -0.13135 | 3.62663  |
| H | -3.31847 | -1.95688 | 4.85542  |
| H | 3.59018  | -2.15074 | 0.06277  |
| H | 3.59174  | 2.14998  | -0.05958 |
| H | 6.04291  | -2.14637 | 0.06204  |
| H | 6.04441  | 2.14379  | -0.06024 |
| H | 7.29587  | -0.00172 | 0.00084  |
| C | -1.78365 | 1.64458  | -0.28232 |
| C | -2.93465 | 1.83365  | -1.05173 |
| C | -1.16797 | 2.74773  | 0.31957  |
| C | -3.46613 | 3.11085  | -1.21028 |
| C | -1.70512 | 4.02076  | 0.16384  |
| C | -2.85437 | 4.20348  | -0.60213 |
| C | -1.78293 | -1.06940 | -1.28818 |

## Supporting Information

|   |          |          |          |
|---|----------|----------|----------|
| C | -1.13284 | -1.14546 | -2.52502 |
| C | -2.96853 | -1.78221 | -1.08869 |
| C | -1.66993 | -1.91405 | -3.55215 |
| C | -3.50003 | -2.55485 | -2.11754 |
| C | -2.85349 | -2.61978 | -3.34903 |
| C | -1.79797 | -0.57901 | 1.56468  |
| C | -1.15133 | -1.60200 | 2.26649  |
| C | -2.99289 | -0.05135 | 2.06247  |
| C | -1.70074 | -2.09978 | 3.44317  |
| C | -3.53719 | -0.54866 | 3.24327  |
| C | -2.89378 | -1.57333 | 3.93254  |
| C | 3.37486  | -0.00025 | 0.00324  |
| C | 4.11132  | -1.19637 | 0.03642  |
| C | 4.11217  | 1.19527  | -0.03168 |
| C | 5.50503  | -1.20163 | 0.03579  |
| C | 5.50583  | 1.19948  | -0.03265 |

|    |          |          |         |
|----|----------|----------|---------|
| C  | 6.20900  | -0.00134 | 0.00139 |
| P  | -1.04869 | -0.00369 | 0.00117 |
| Au | 1.33345  | -0.00089 | 0.00497 |

Zero-point correction= 0.370558 (Hartree/Particle)

Thermal correction to Energy= 0.393989

Thermal correction to Enthalpy= 0.394933

Thermal correction to Gibbs Free Energy= 0.310555

Sum of electronic and zero-point Energies= -1402.726776

Sum of electronic and thermal Energies= -1402.703345

Sum of electronic and thermal Enthalpies= -1402.702401

Sum of electronic and thermal Free Energies= -1402.786779

E(RM06L) = -1403.57402539

## Bond Dissociation Energies

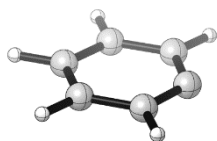

|   |          |          |          |
|---|----------|----------|----------|
| H | 2.15056  | 1.17724  | 0.00003  |
| H | 2.15945  | -1.32086 | 0.00001  |
| H | -2.15942 | -1.32091 | 0.00003  |
| H | -2.15055 | 1.17723  | -0.00001 |
| H | -0.00002 | 2.40728  | 0.00003  |
| C | 1.21115  | 0.63074  | 0.00001  |
| C | 1.22396  | -0.76928 | -0.00003 |
| C | 0.00001  | -1.39775 | 0.00001  |
| C | -1.22396 | -0.76926 | 0.00001  |
| C | -1.21117 | 0.63072  | -0.00002 |
| C | 0.00001  | 1.32150  | 0.00001  |

Zero-point correction= 0.088670 (Hartree/Particle)

Thermal correction to Energy= 0.092995

Thermal correction to Enthalpy= 0.093939

Thermal correction to Gibbs Free Energy= 0.060651

Sum of electronic and zero-point Energies= -231.382847

Sum of electronic and thermal Energies= -231.378523

Sum of electronic and thermal Enthalpies= -231.377578

Sum of electronic and thermal Free Energies= -231.410867

E(UM06L) = -231.585604085

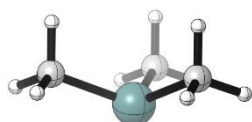

|    |          |          |          |
|----|----------|----------|----------|
| H  | 1.68524  | -0.76833 | 1.43540  |
| H  | 1.81183  | -1.80172 | -0.00389 |
| H  | 2.54821  | -0.18612 | -0.00396 |
| H  | -1.50922 | -1.07347 | 1.43538  |
| H  | -2.46622 | -0.66818 | -0.00522 |
| H  | -1.43535 | -2.11372 | -0.00264 |
| H  | 0.65509  | 2.46962  | -0.00326 |
| H  | -1.11236 | 2.30029  | -0.00443 |
| H  | -0.17766 | 1.84306  | 1.43524  |
| C  | 1.68955  | -0.77036 | 0.33825  |
| C  | -1.51220 | -1.07758 | 0.33823  |
| C  | -0.17744 | 1.84828  | 0.33807  |
| Ge | 0.00003  | -0.00011 | -0.32406 |

Zero-point correction= 0.110450 (Hartree/Particle)

Thermal correction to Energy= 0.118256

Thermal correction to Enthalpy= 0.119200

Thermal correction to Gibbs Free Energy= 0.077819

Sum of electronic and zero-point Energies= -2194.314256

Sum of electronic and thermal Energies= -2194.306450

Sum of electronic and thermal Enthalpies= -2194.305506

Sum of electronic and thermal Free Energies= -2194.346887

E(UM06L) = -2196.63151678

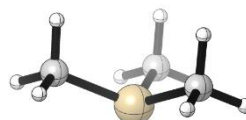

|    |          |          |          |
|----|----------|----------|----------|
| H  | 0.90410  | 1.57810  | 1.27825  |
| H  | 1.92873  | 1.58352  | -0.16795 |
| H  | 0.39250  | 2.46467  | -0.16873 |
| H  | 0.91394  | -1.57242 | 1.27825  |
| H  | 0.40820  | -2.46215 | -0.16884 |
| H  | 1.93875  | -1.57121 | -0.16783 |
| H  | -2.33599 | 0.87813  | -0.16841 |
| H  | -2.33044 | -0.89284 | -0.16851 |
| H  | -1.81919 | -0.00581 | 1.27830  |
| C  | 0.89082  | 1.55404  | 0.17994  |
| C  | 0.90064  | -1.54836 | 0.17994  |
| C  | -1.79133 | -0.00567 | 0.18002  |
| Si | -0.00010 | -0.00000 | -0.43314 |

Zero-point correction= 0.111386 (Hartree/Particle)

Thermal correction to Energy= 0.118754

Thermal correction to Enthalpy= 0.119699

Thermal correction to Gibbs Free Energy= 0.080355

Sum of electronic and zero-point Energies= -409.034188

Sum of electronic and thermal Energies= -409.026820

Sum of electronic and thermal Enthalpies= -409.025876

Sum of electronic and thermal Free Energies= -409.065219

E(UM06L) = -409.22310245

# NMR Spectra

## Triethyl(4-fluorophenyl)germane

**<sup>1</sup>H NMR**  
(599.86 MHz, CDCl<sub>3</sub>)

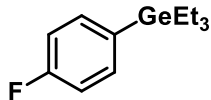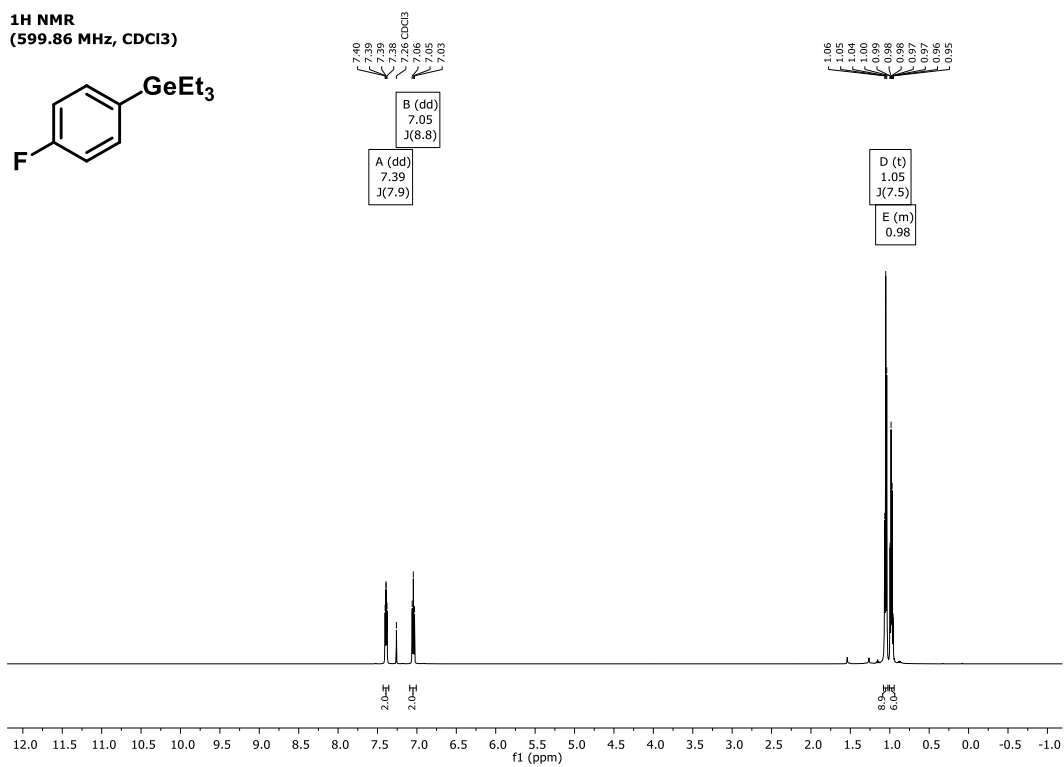

**<sup>13</sup>C NMR**  
(150.85 MHz, CDCl<sub>3</sub>)

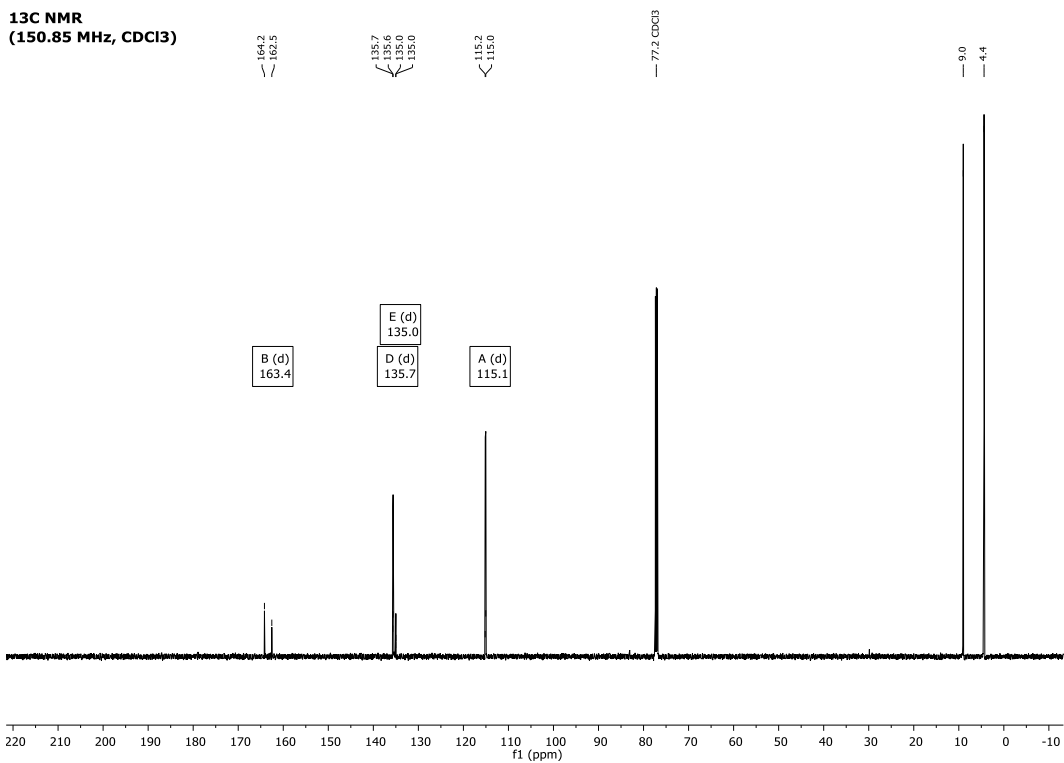

Supporting Information

**<sup>19</sup>F NMR**  
(564.38 MHz, CDCl<sub>3</sub>)

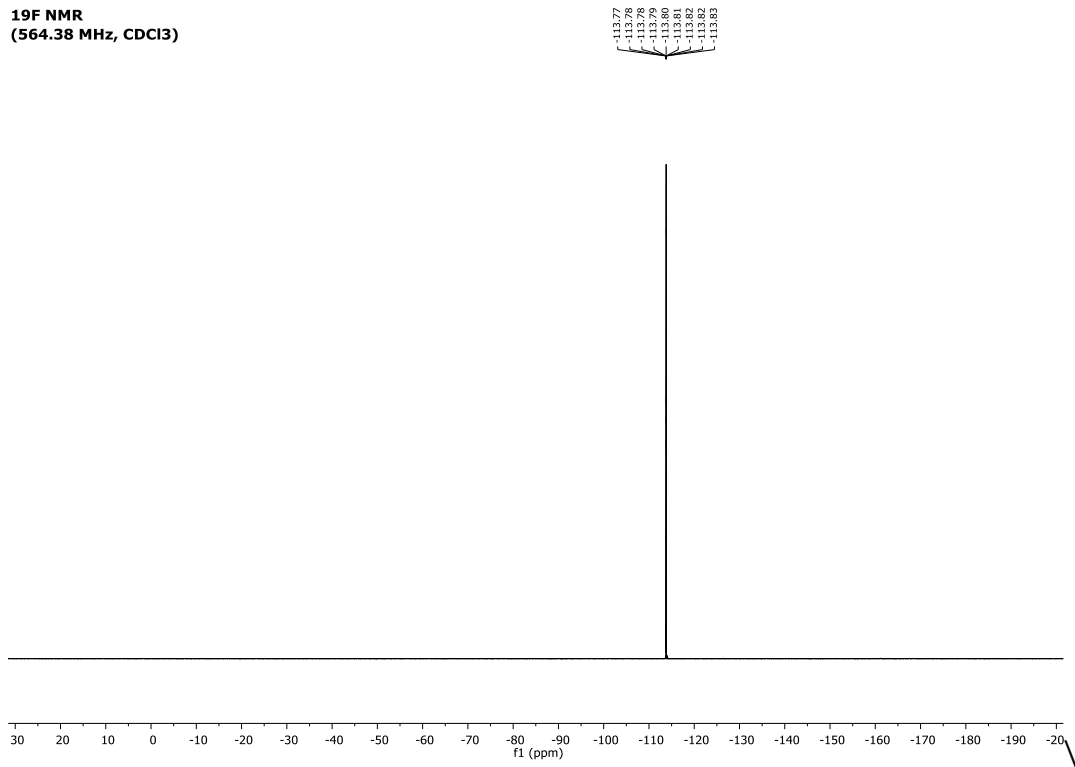

## Triethyl(4-(trifluoromethyl)phenyl)germane

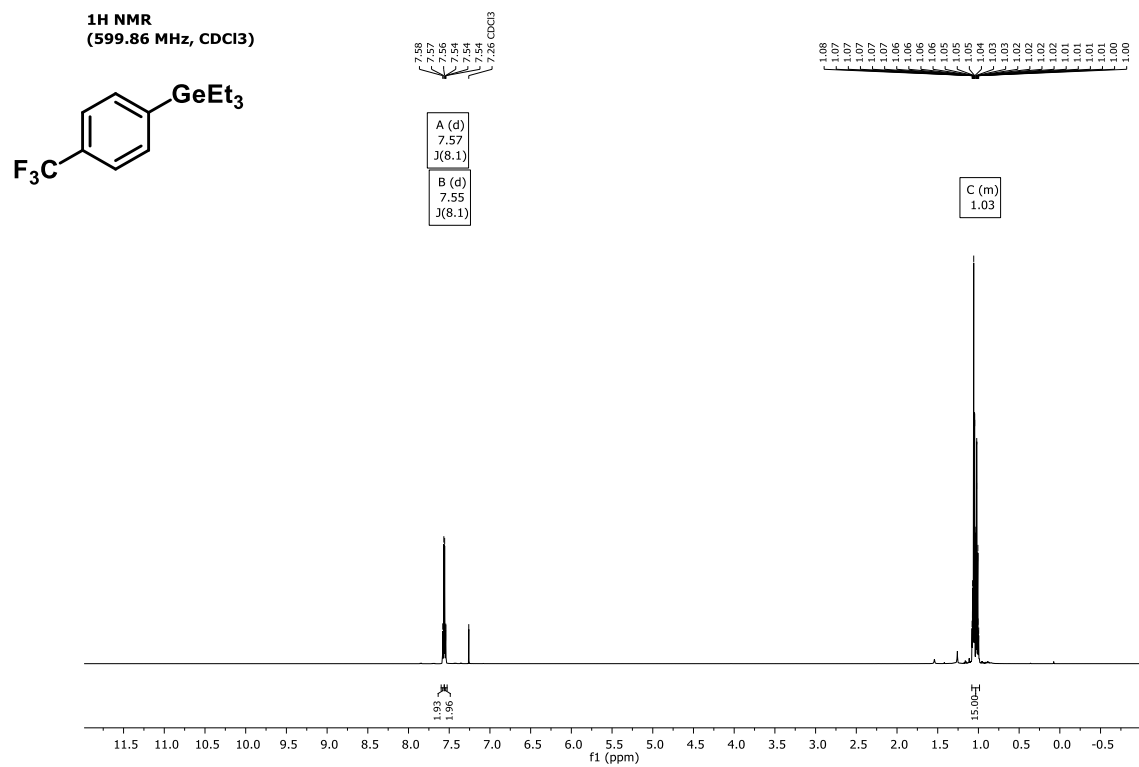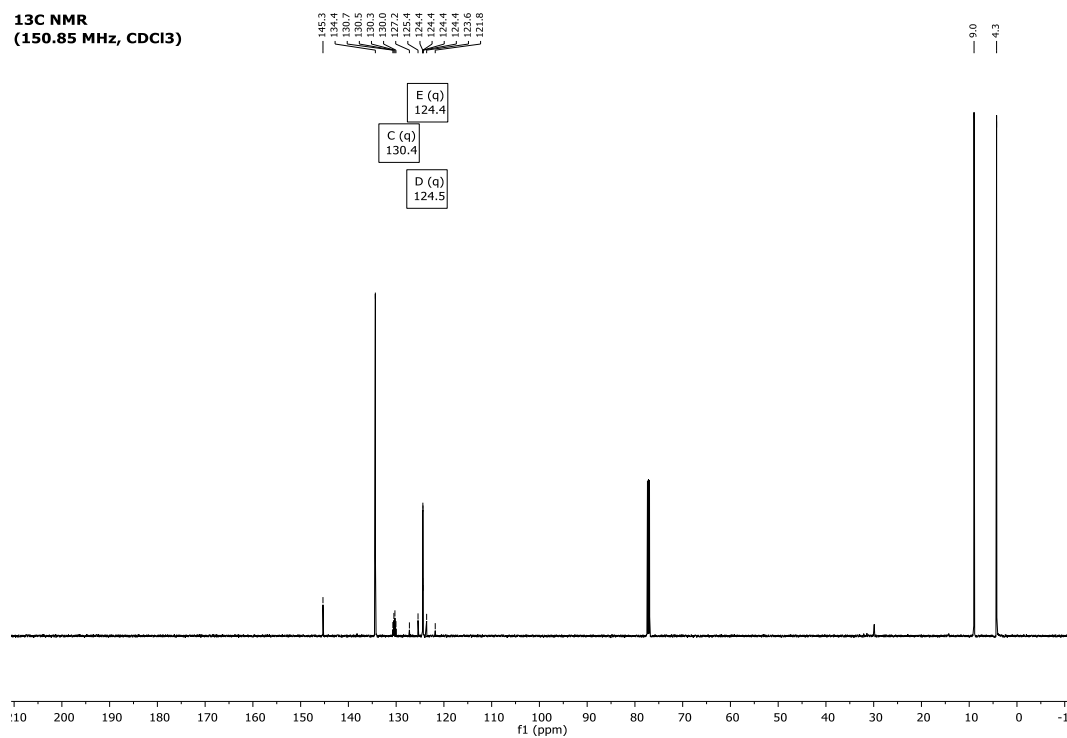



Supporting Information

**<sup>19</sup>F NMR**  
**(564.38 MHz, CDCl<sub>3</sub>)**

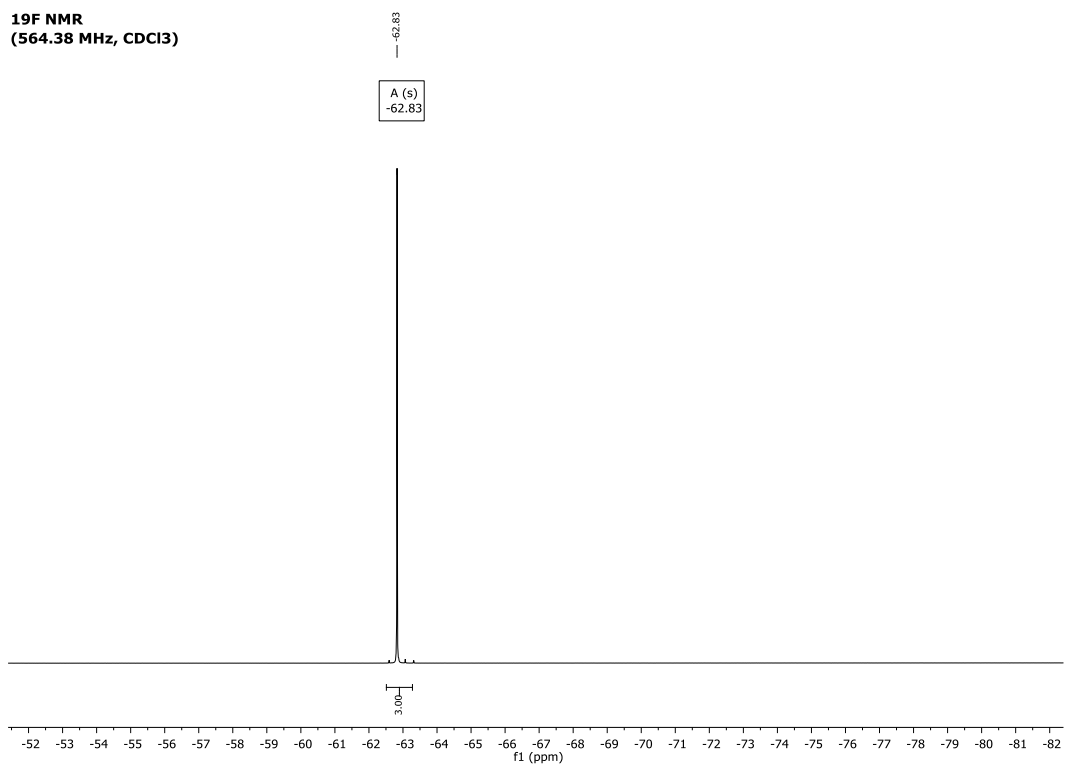

## Triethyl(2-fluorophenyl)germane

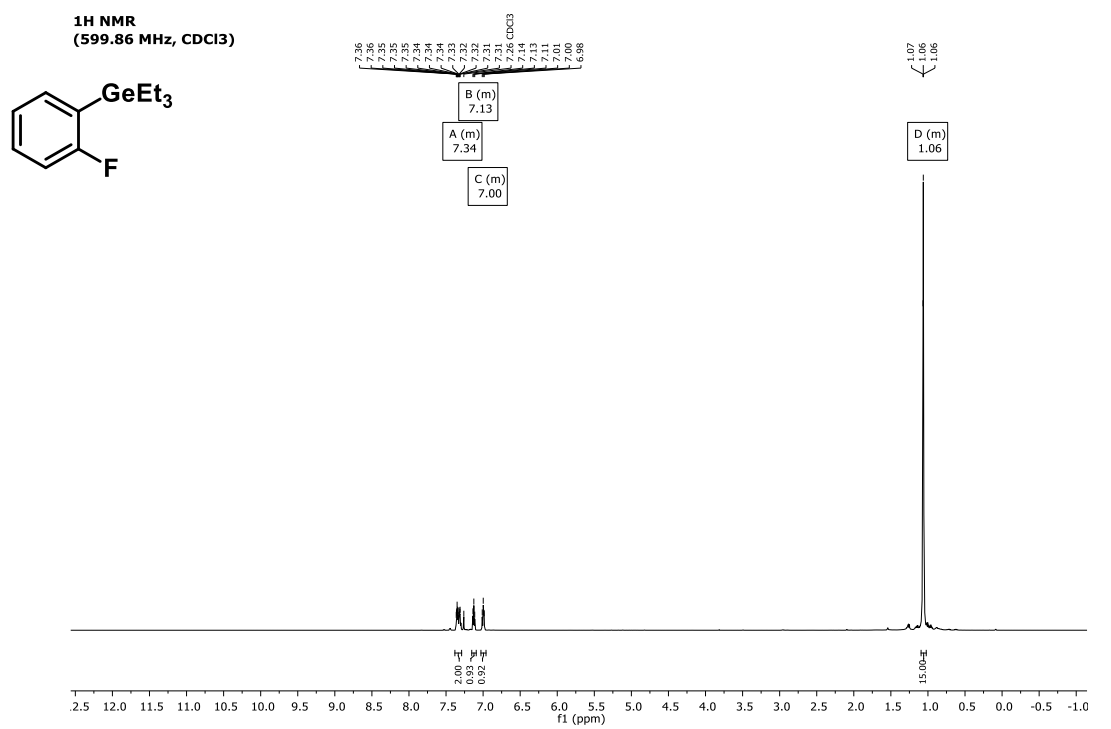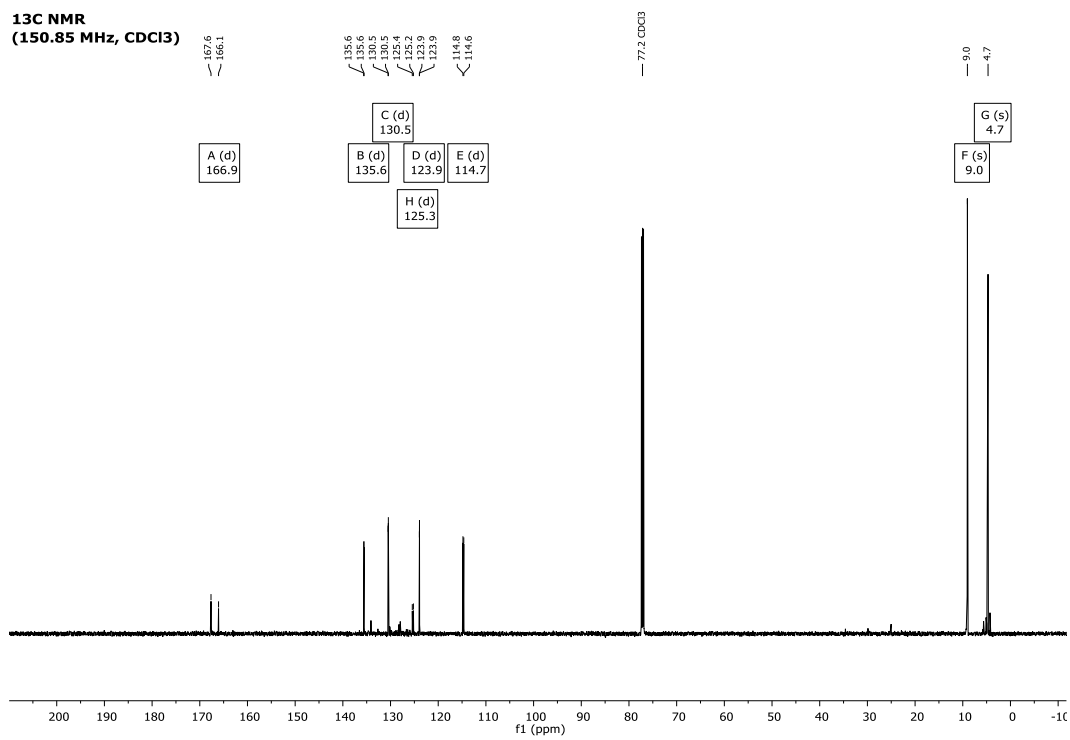

Supporting Information

**<sup>19</sup>F NMR**  
**(564.38 MHz, CDCl<sub>3</sub>)**

-98.75  
-98.76  
-98.77  
-98.78

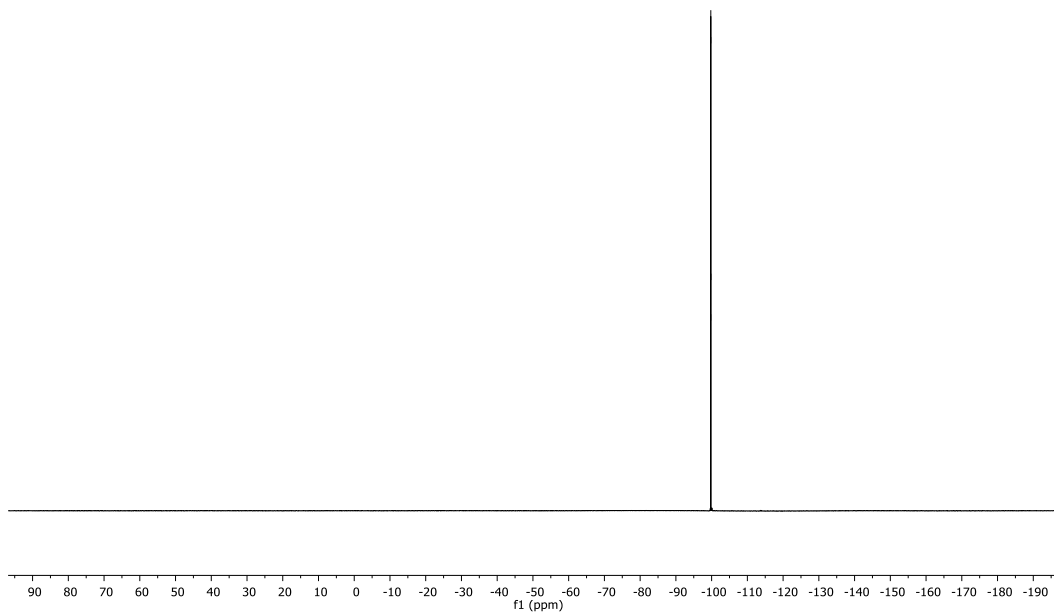

## Triethyl(3-fluorophenyl)germane

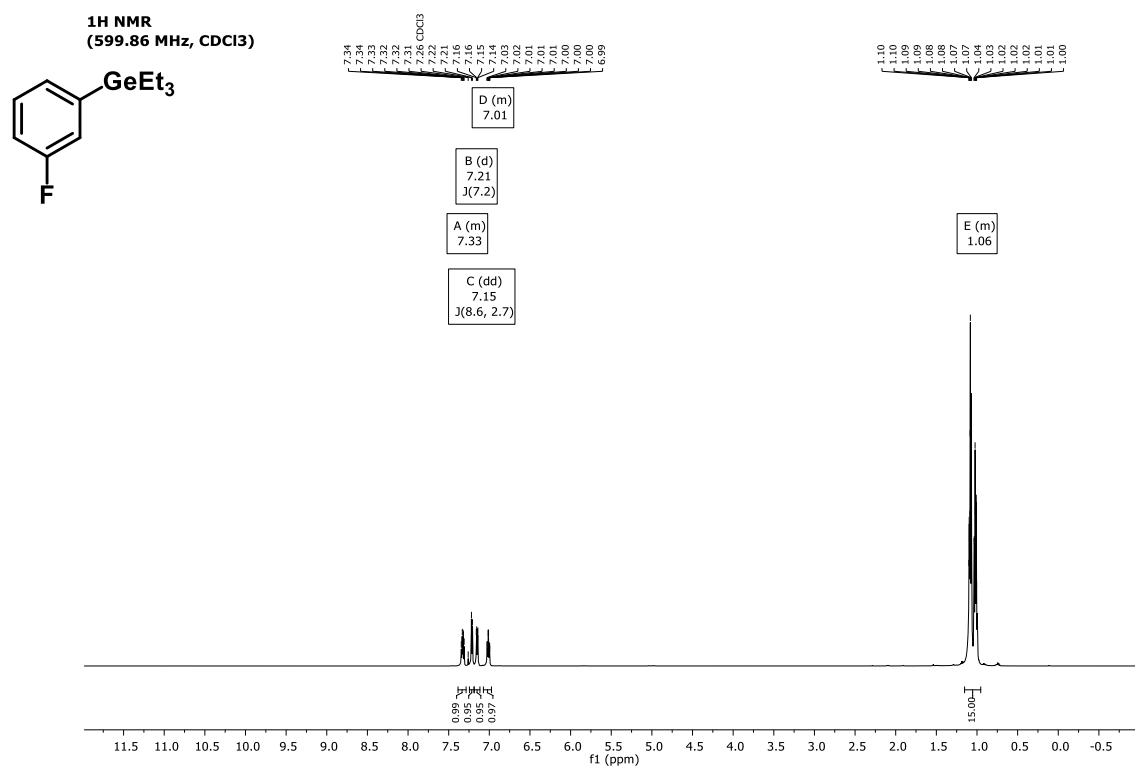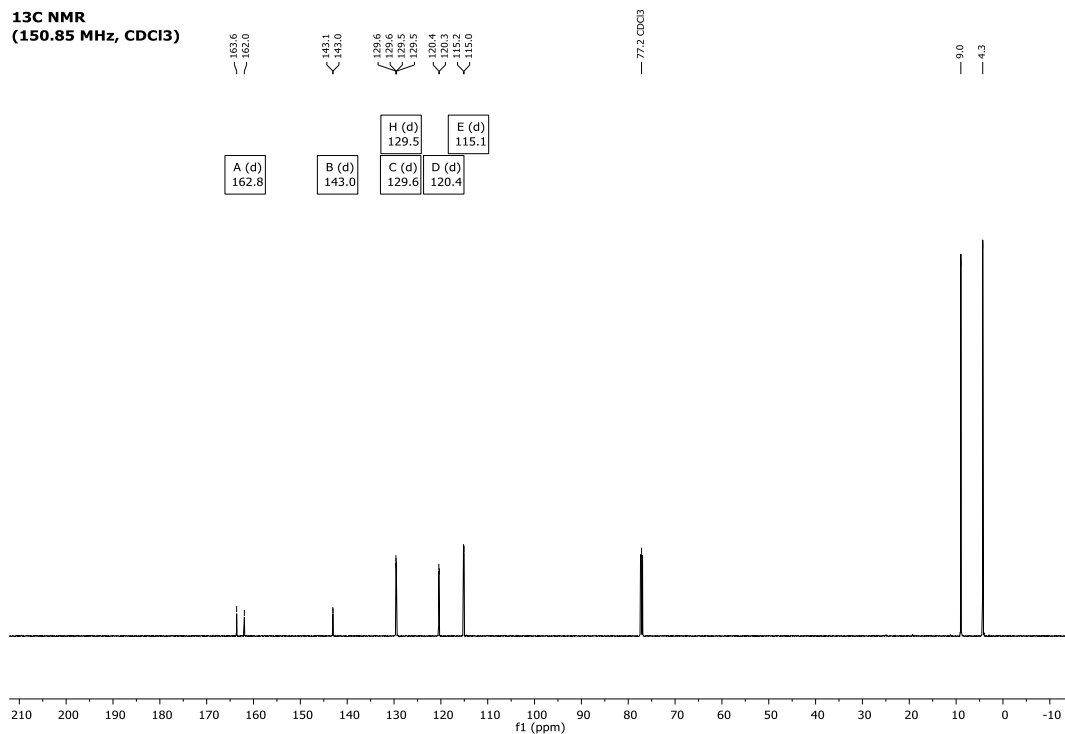

Supporting Information

**<sup>19</sup>F NMR**  
**(564.38 MHz, CDCl<sub>3</sub>)**

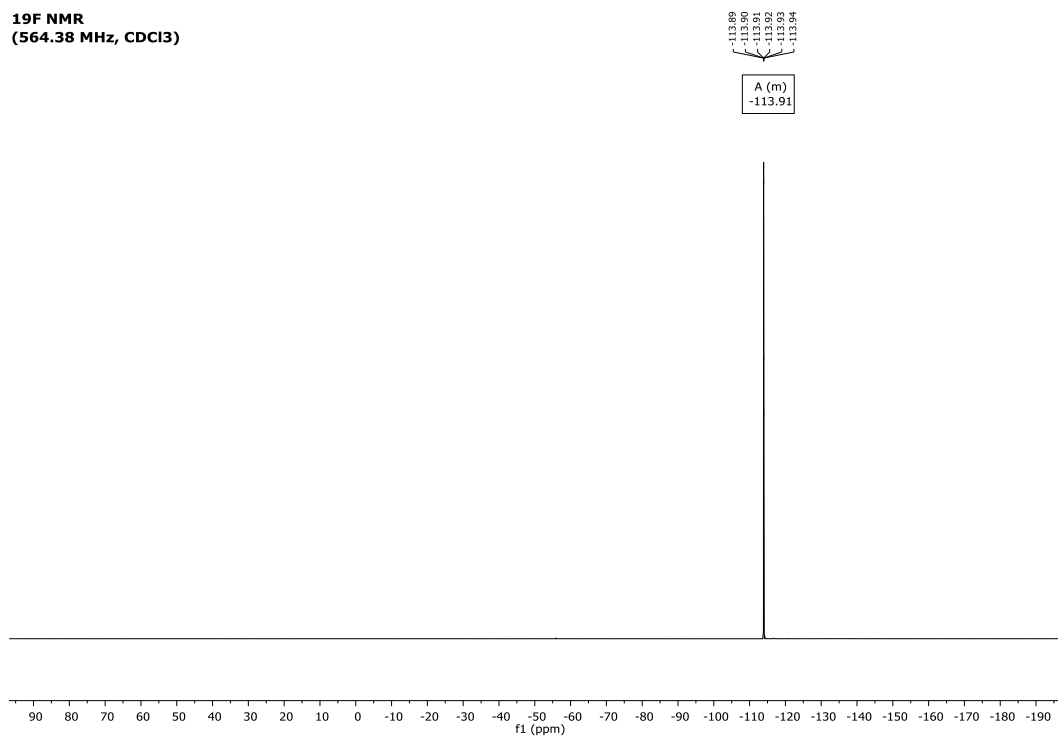



Triethyl(4-chlorophenyl)germane

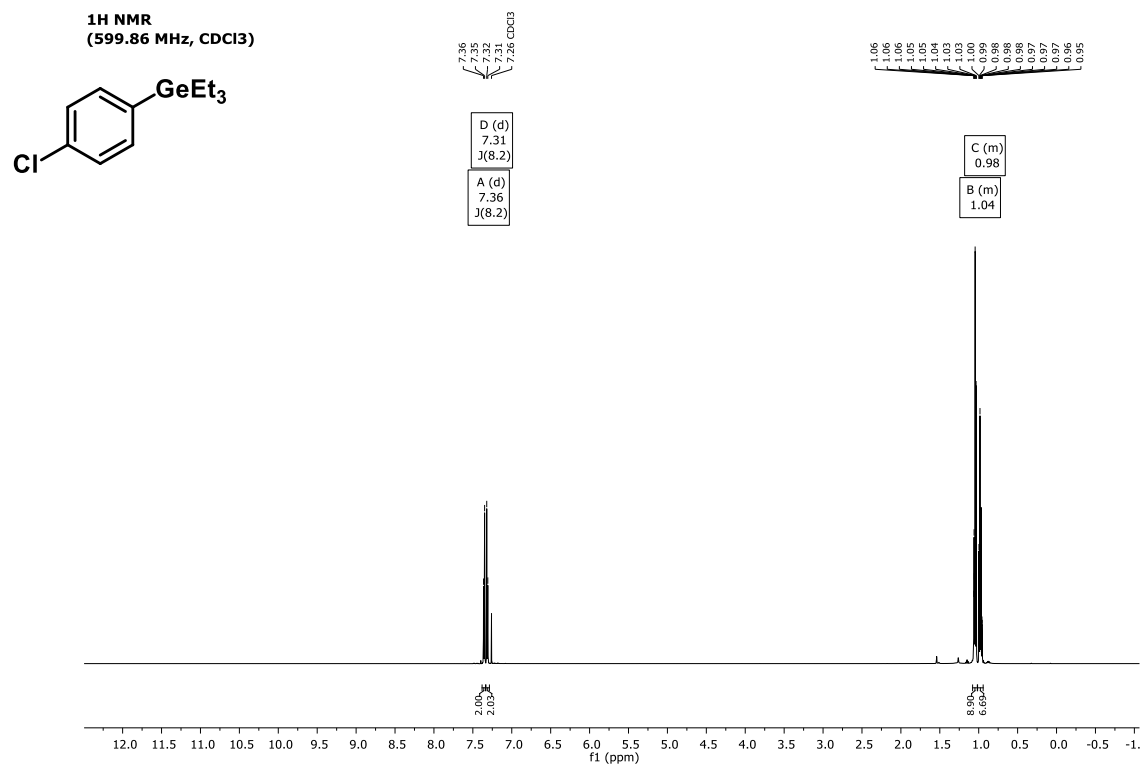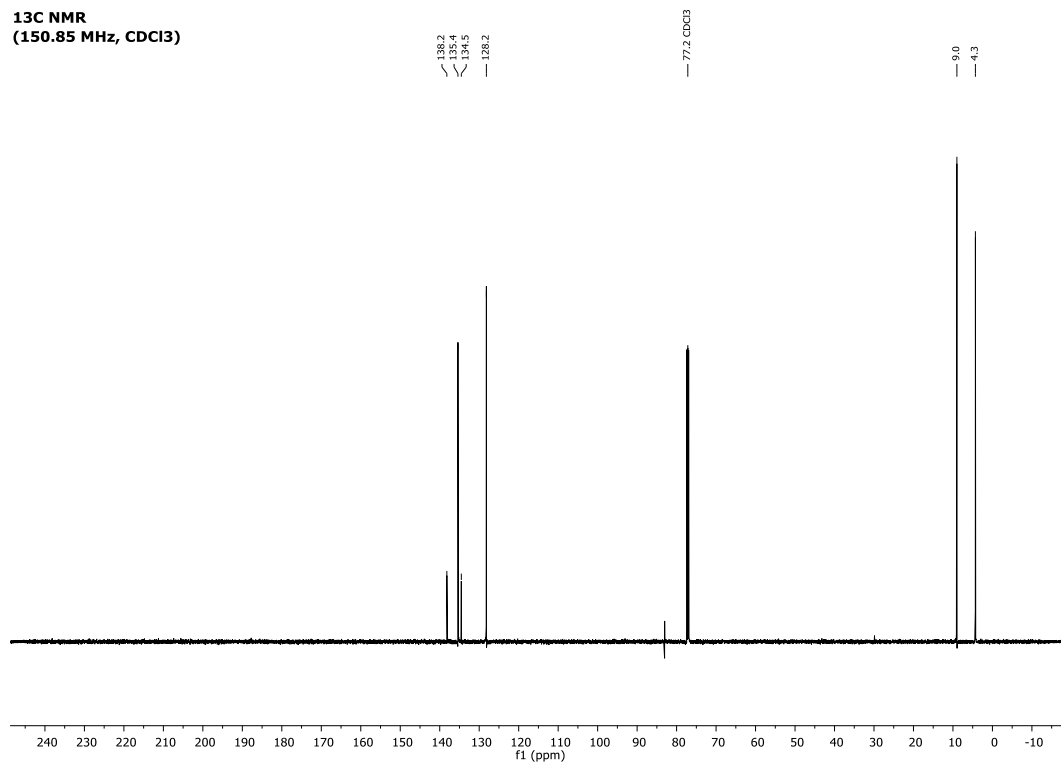

## Triethyl(3-bromophenyl)germane

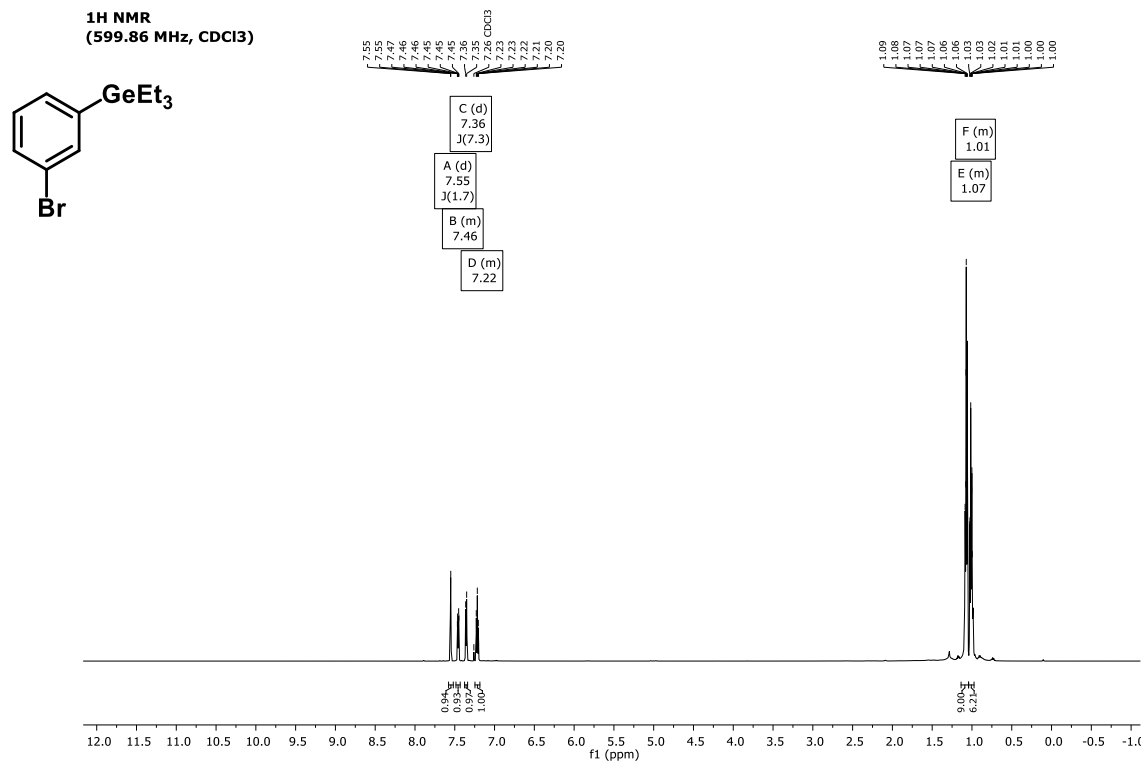



## Triethyl(4-bromophenyl)germane

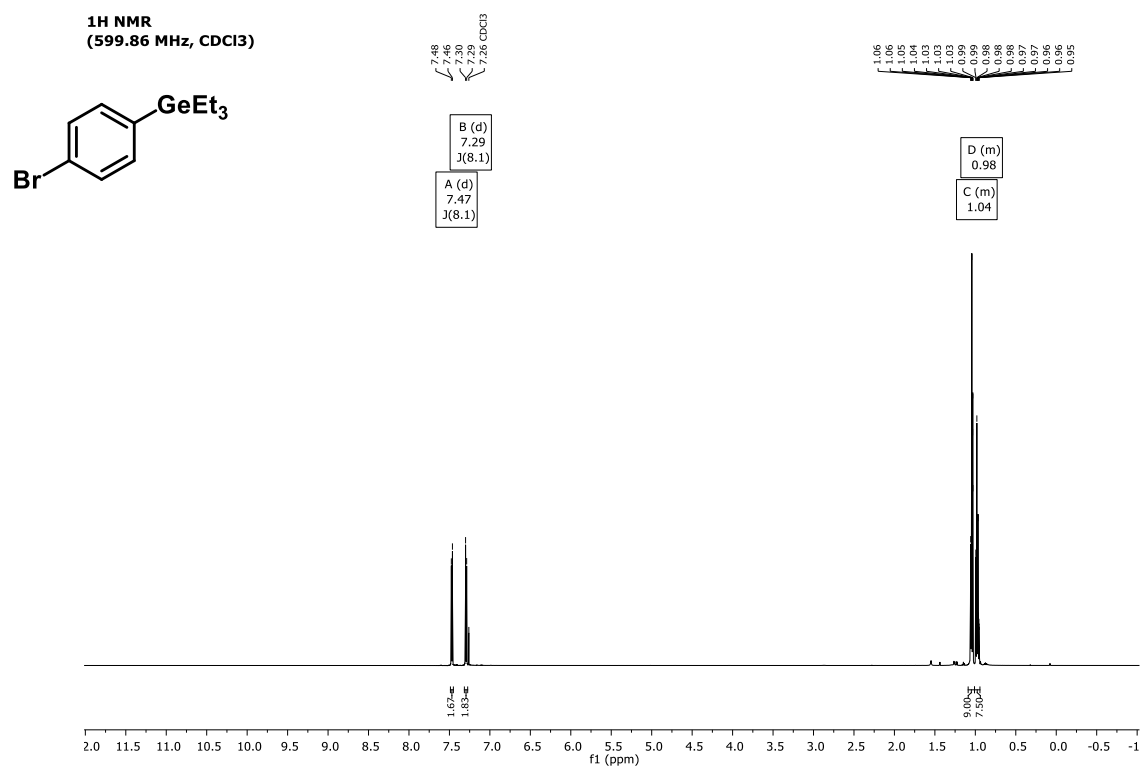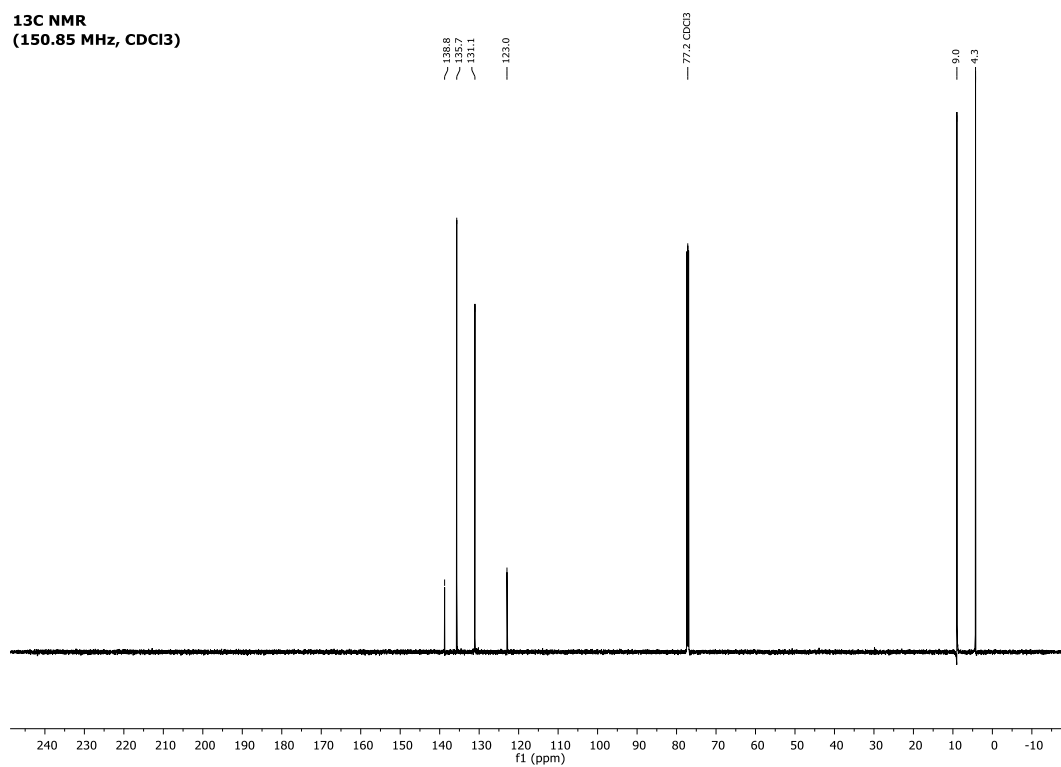

## Triethyl(4-iodophenyl)germane

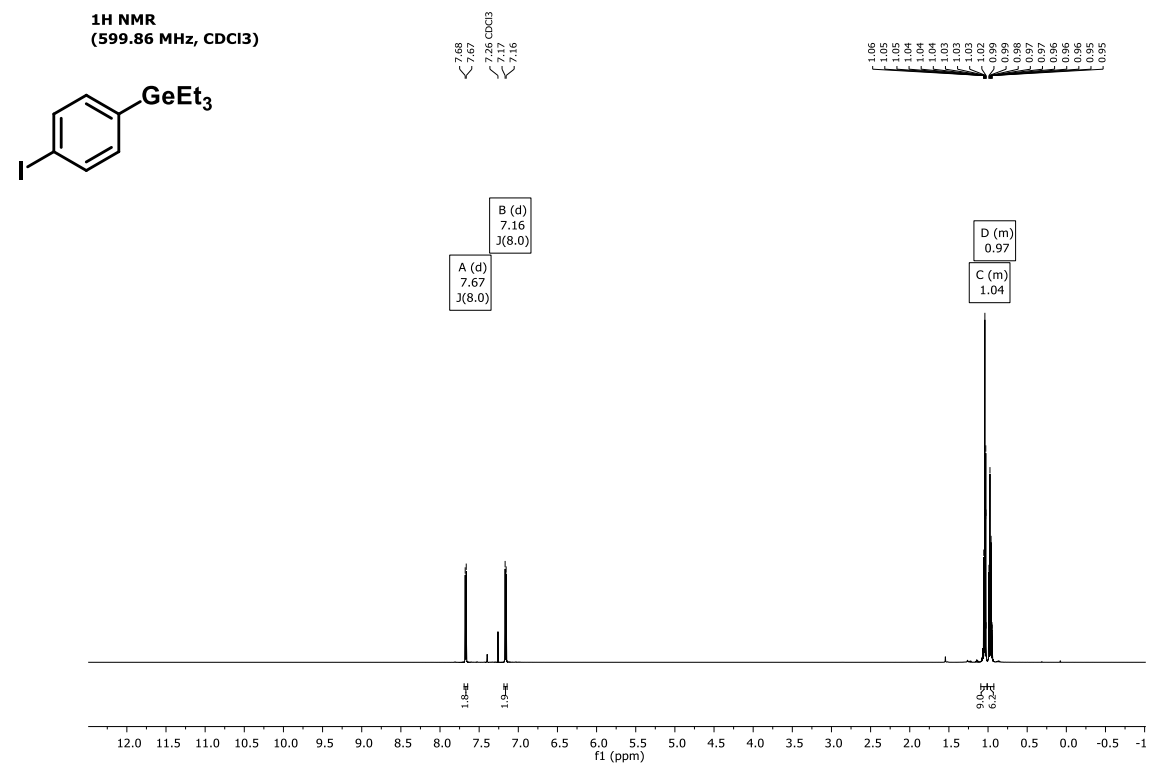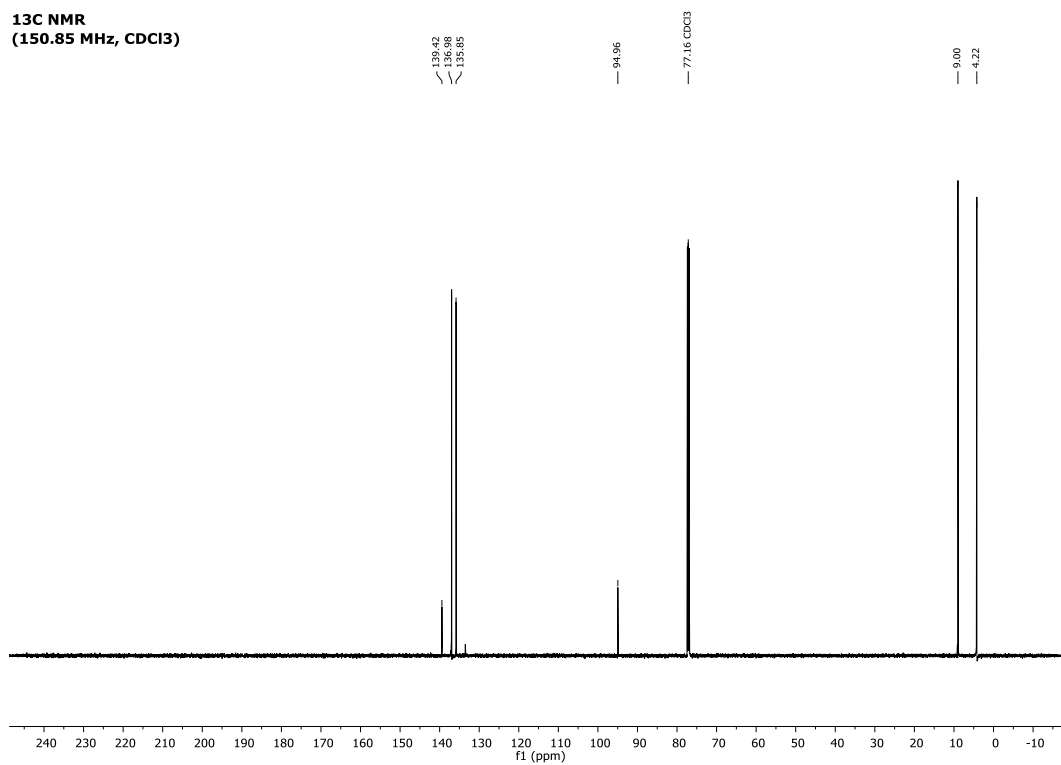

**tert-Butyldimethyl(4-(triethylgermyl)phenoxy)silane**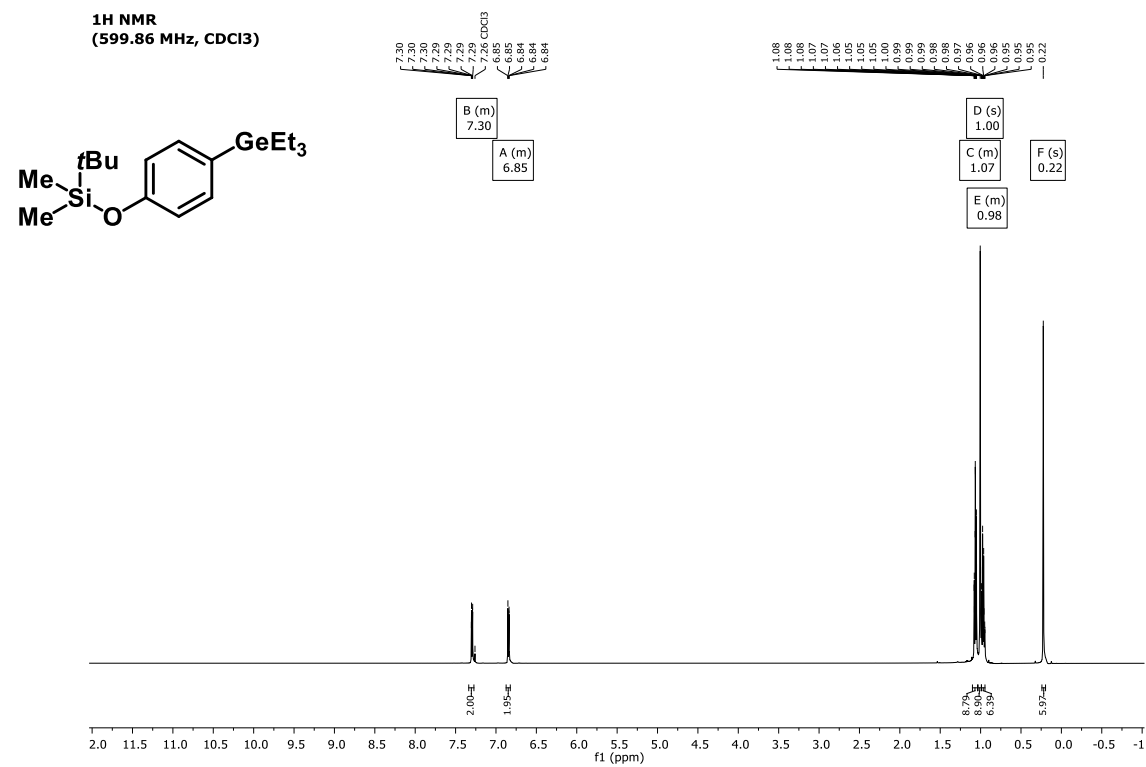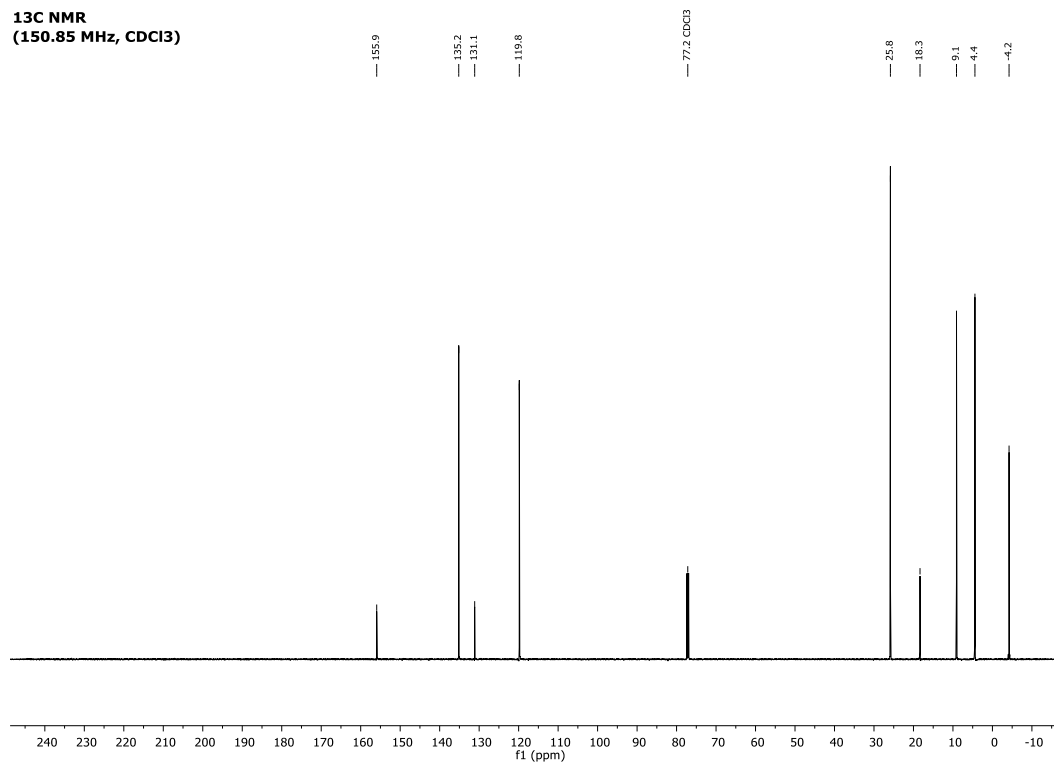

### 3-Bromo-3'-fluoro-4-methoxy-1,1'-biphenyl

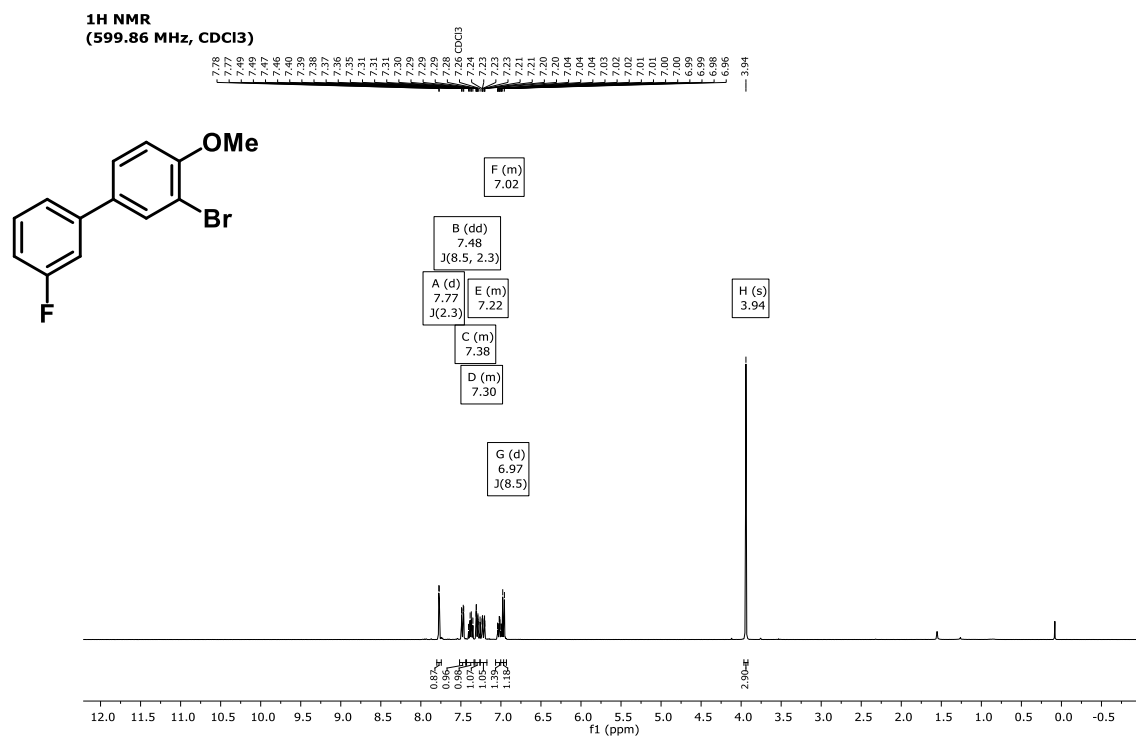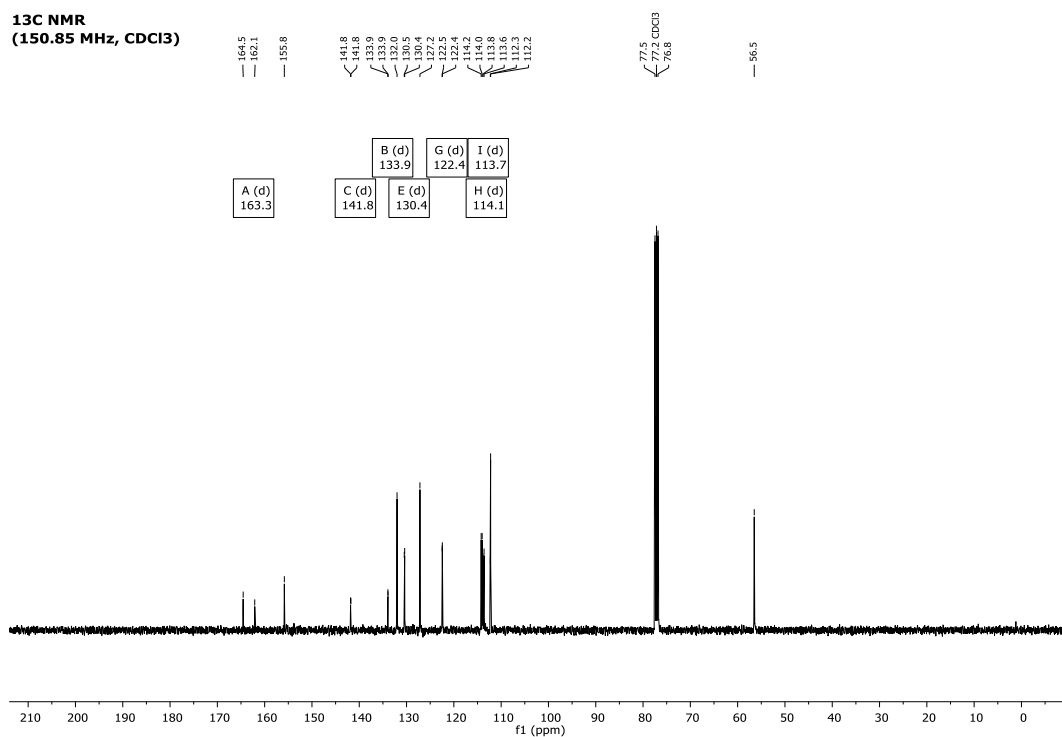

Supporting Information

**<sup>19</sup>F NMR**  
**(564.38 MHz, CDCl<sub>3</sub>)**

-112.86  
-112.89  
-112.93  
A (m)  
-112.90

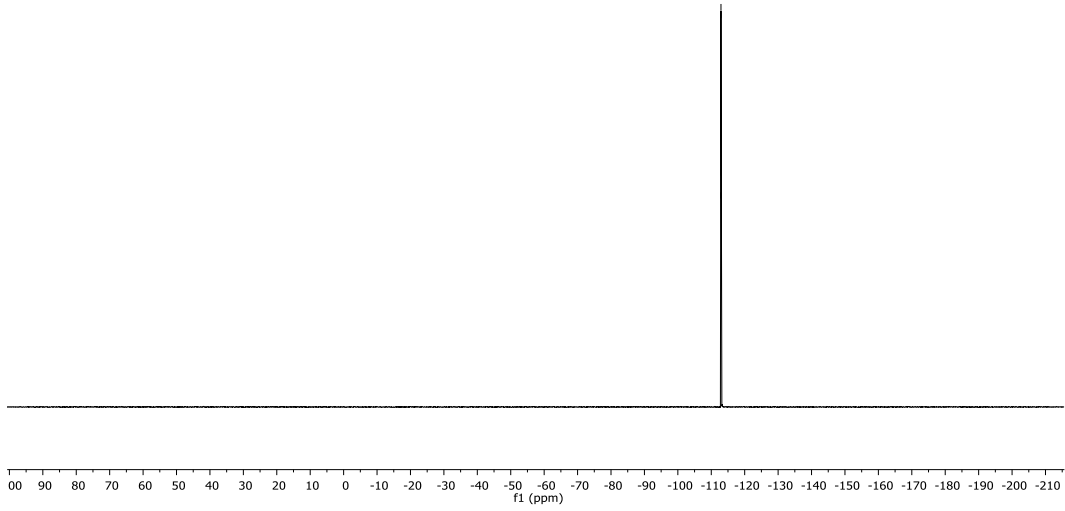

## 3-Bromo-3'-chloro-4-methoxy-1,1'-biphenyl

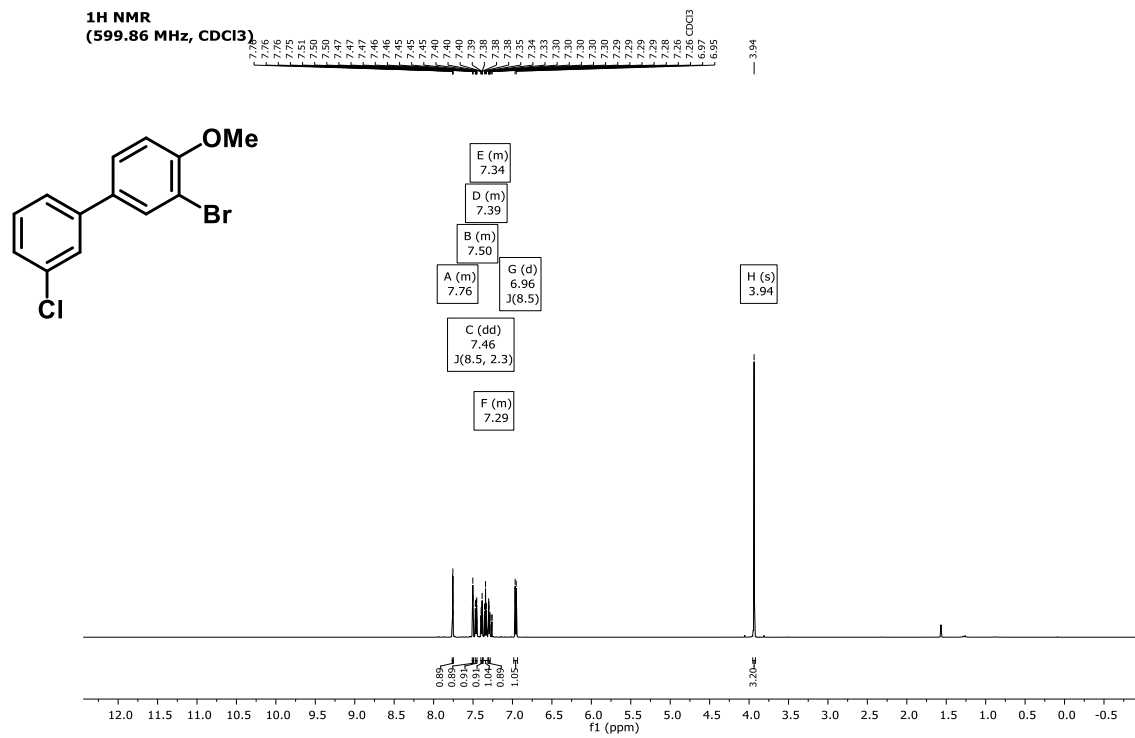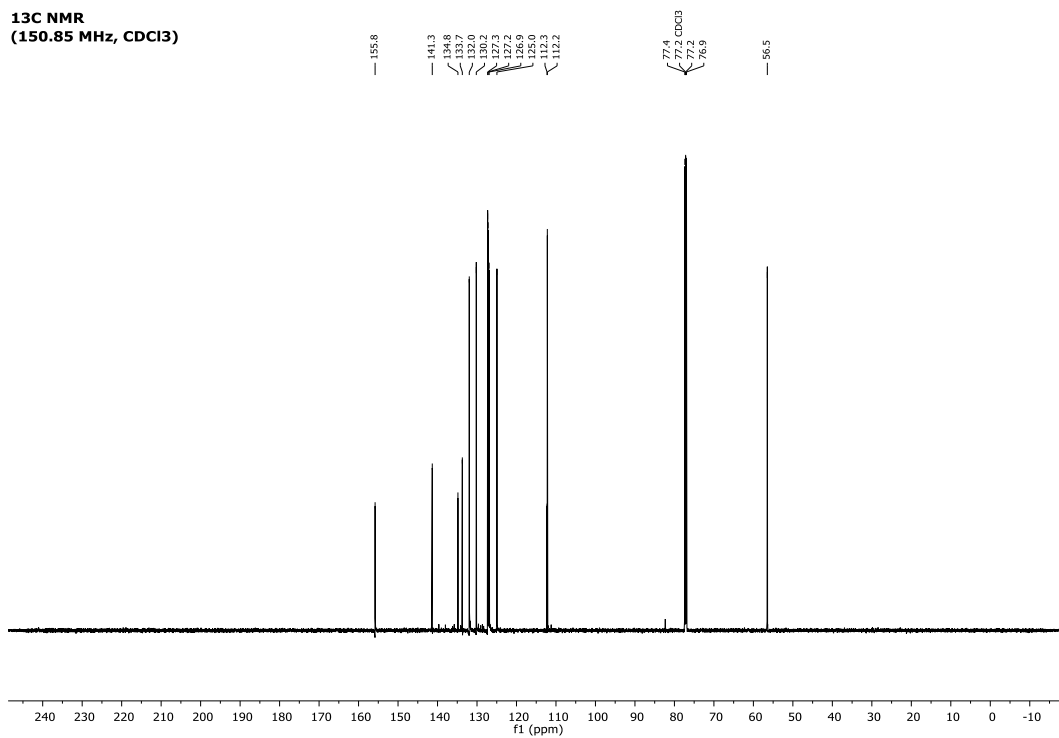

## 1-(4'-Fluoro-4-methoxy-[1,1'-biphenyl]-3-yl)ethan-1-one

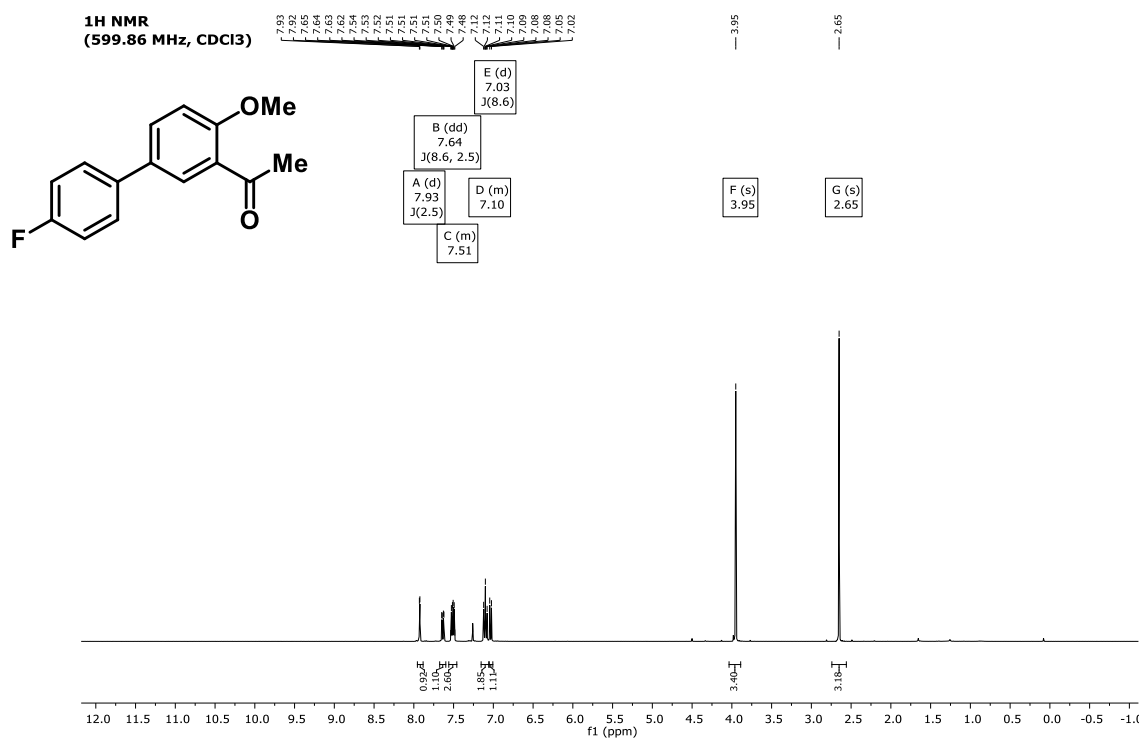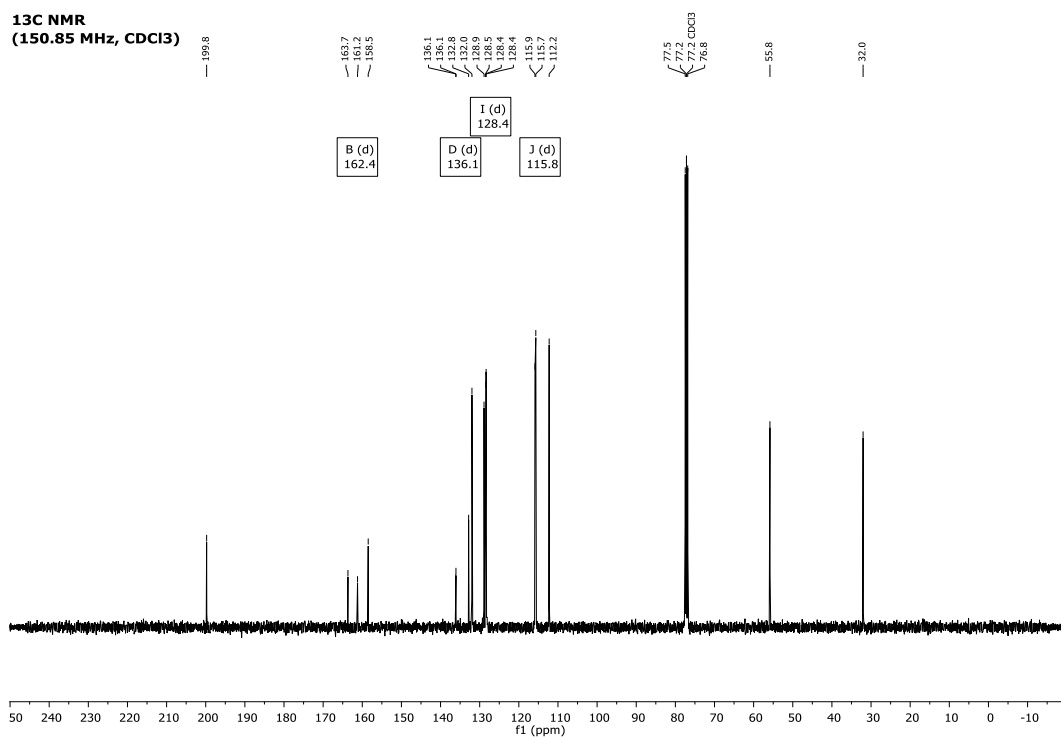

Supporting Information

**<sup>19</sup>F NMR**  
**(564.38 MHz, CDCl<sub>3</sub>)**

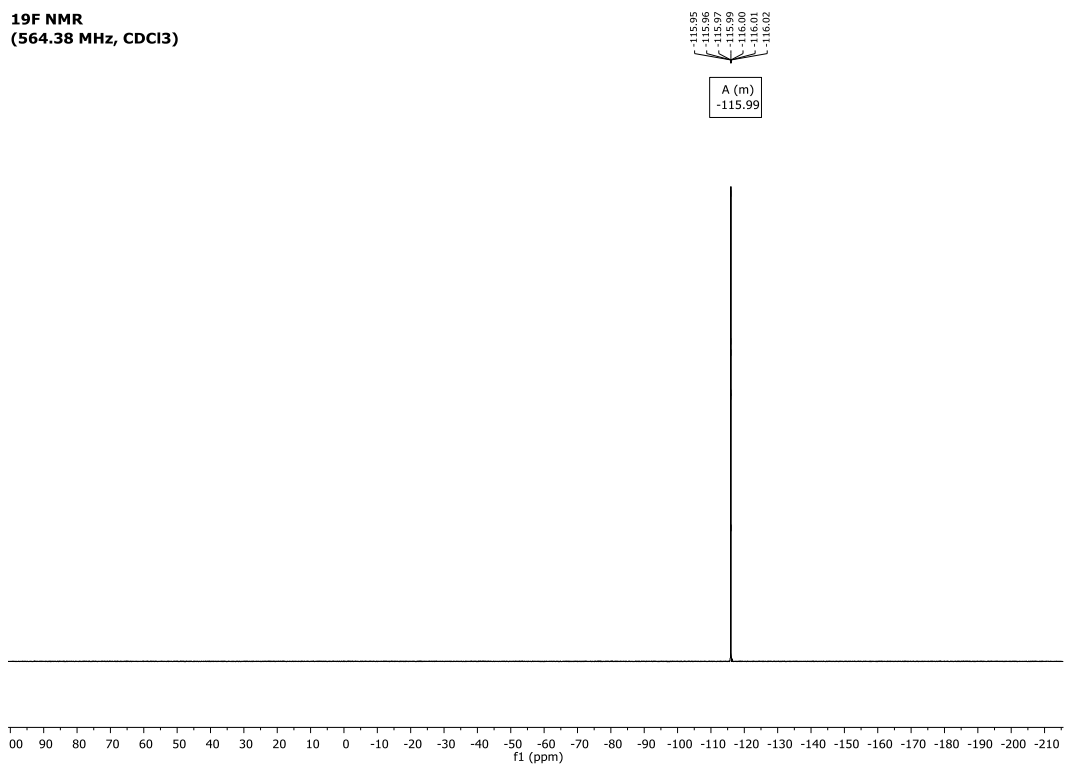



**tert-Butyldimethyl((2',4',6'-trimethyl-[1,1'-biphenyl]-4-yl)oxy)silane**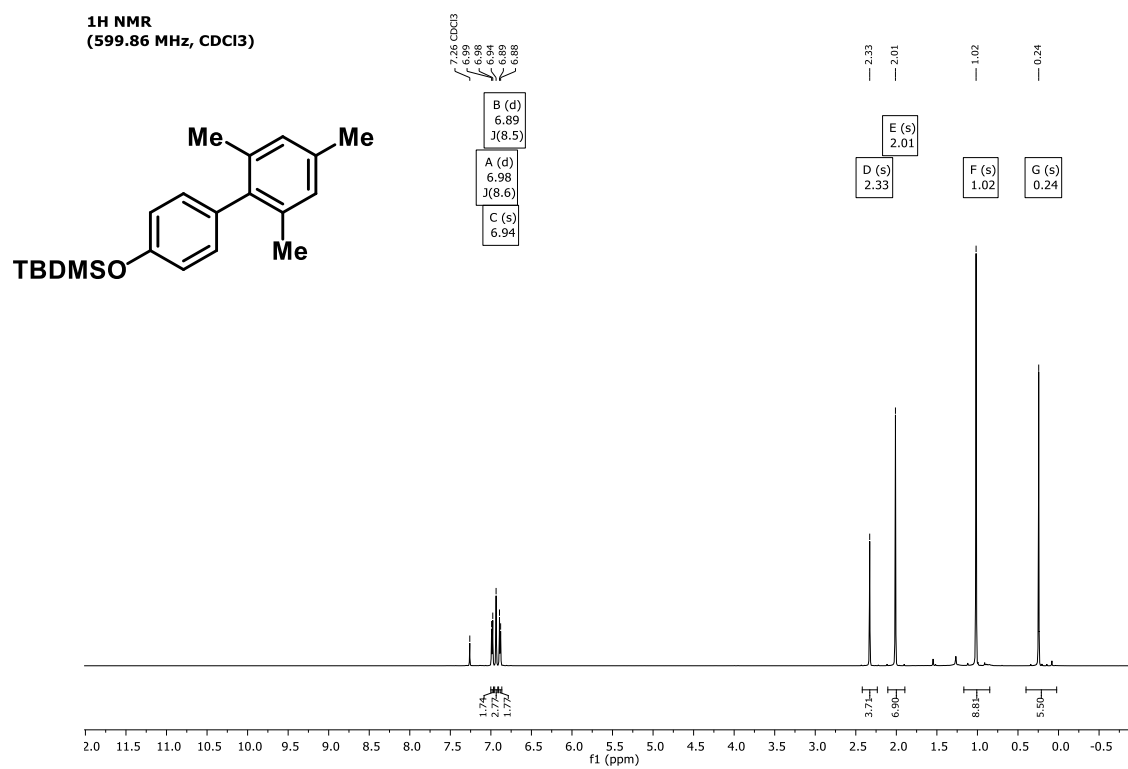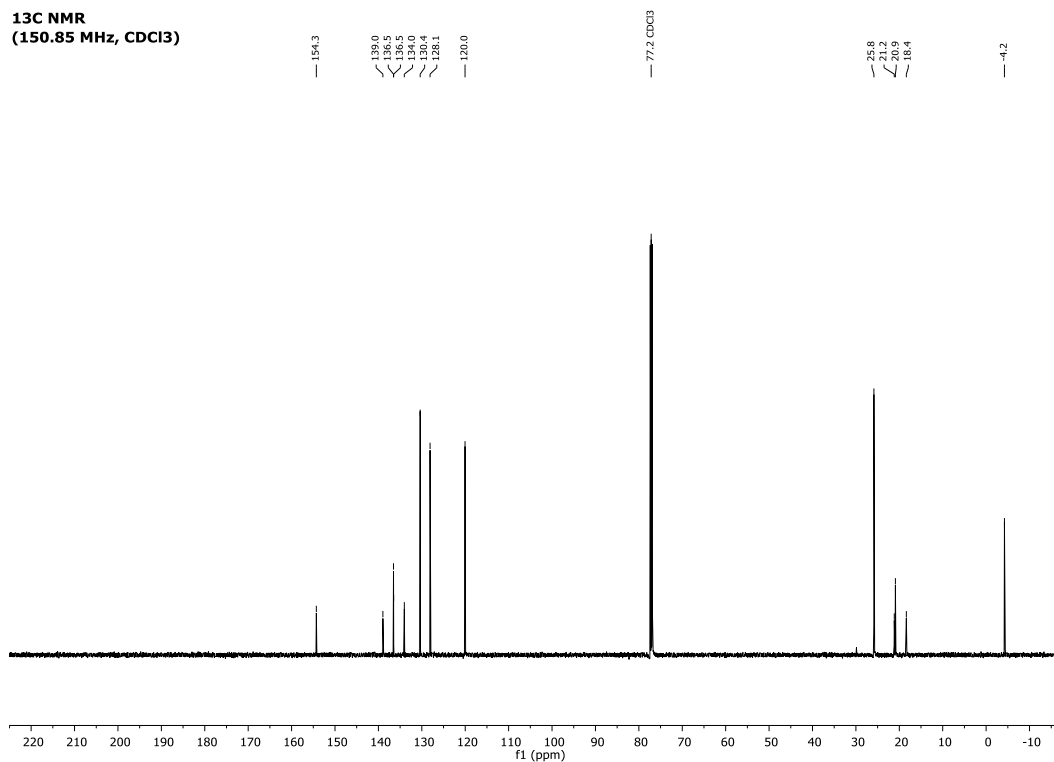



# Supporting Information

**<sup>19</sup>F NMR**  
(564.38 MHz, CDCl<sub>3</sub>)

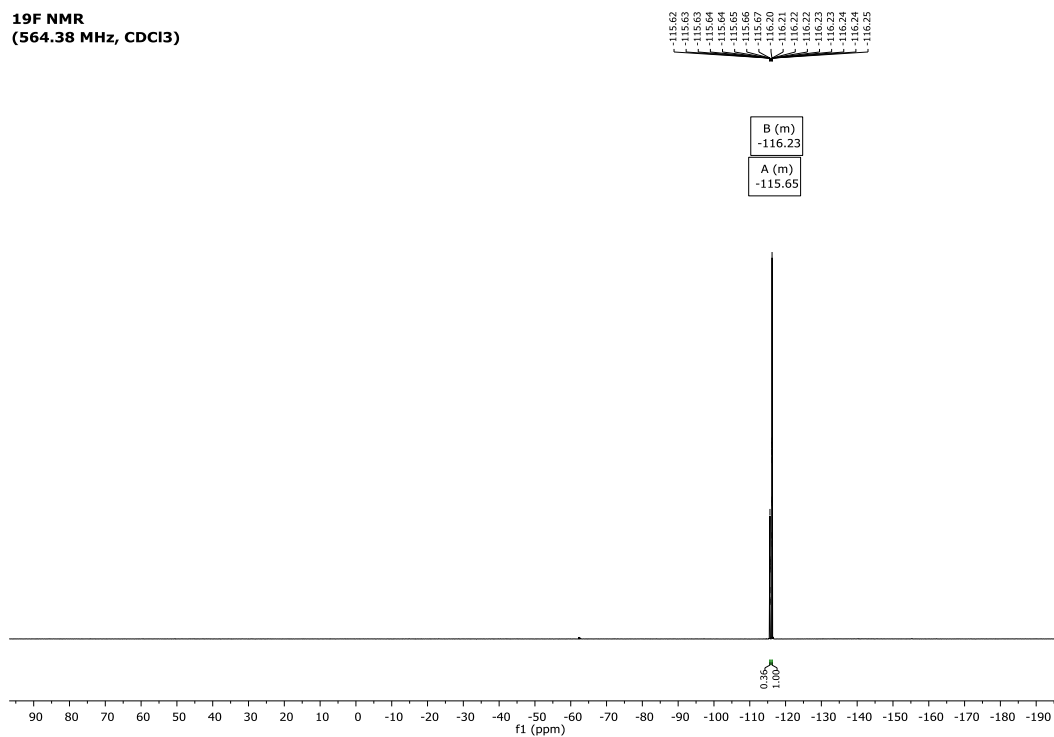

## 4-(4-Bromophenyl)-2-chloro-5-(4-fluorophenyl)thiazole

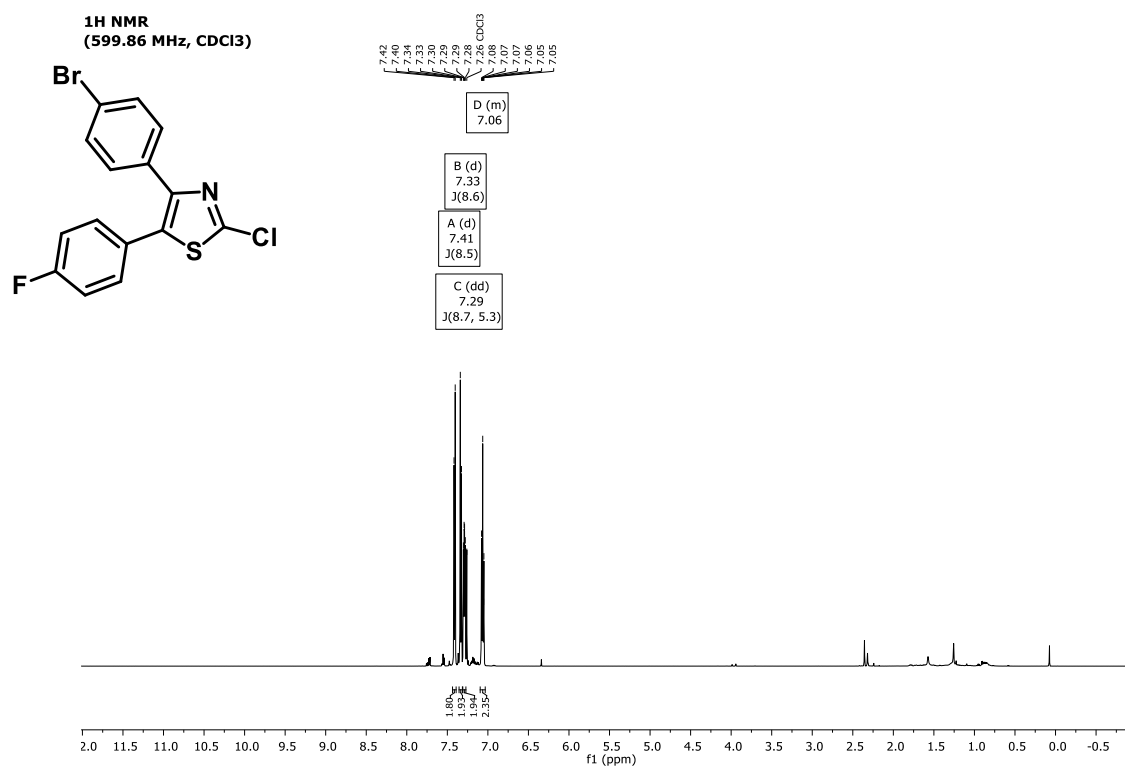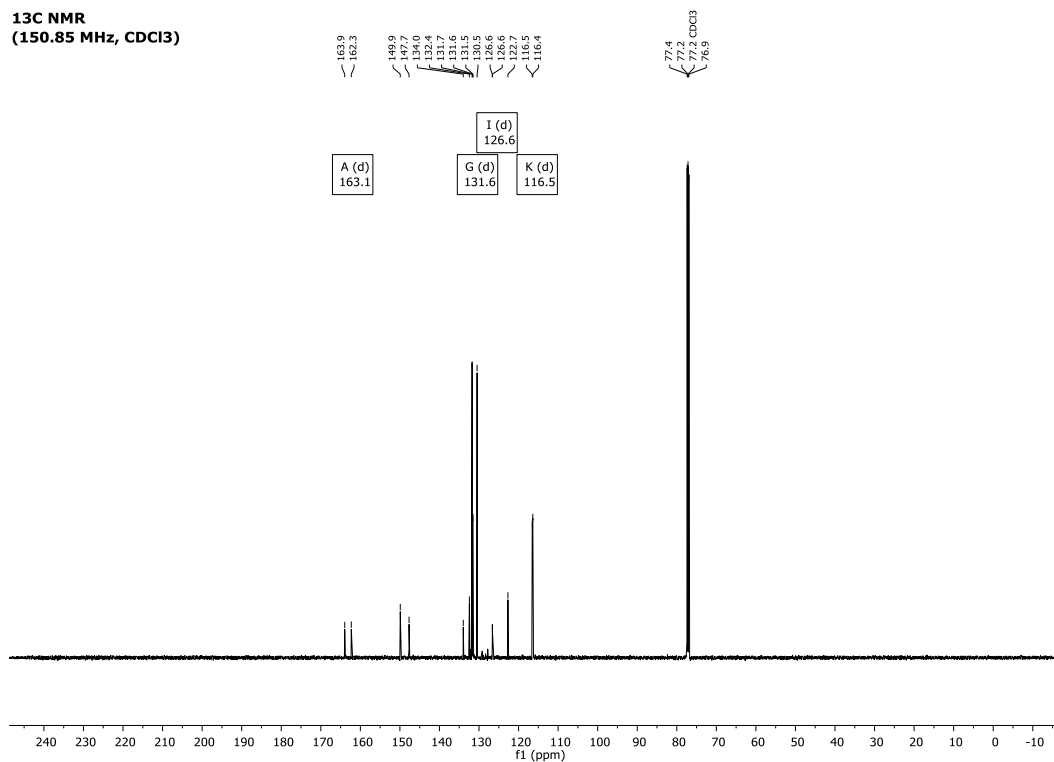

Supporting Information

**<sup>19</sup>F NMR**  
**(564.38 MHz, CDCl<sub>3</sub>)**

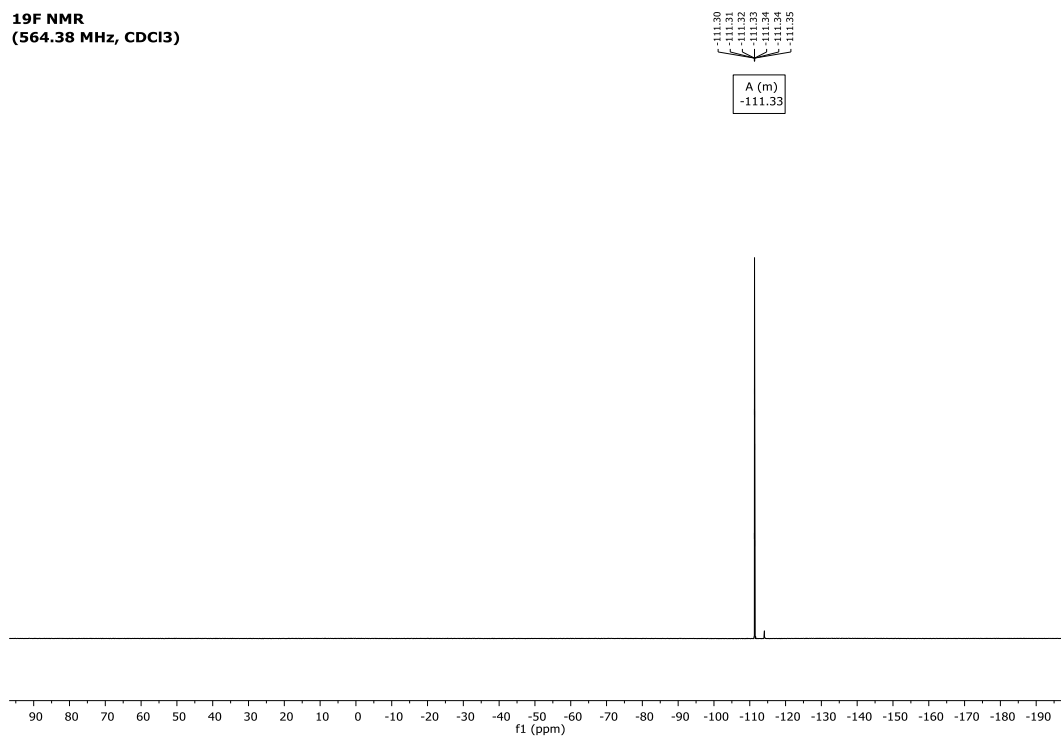

## References

- (1) (a) Weber, D.; Jones, T. D.; Adduci, L. L.; Gagne, M. R. Strong Electronic and Counterion Effects on Geminal Digold Formation and Reactivity as Revealed by Gold(I)-Aryl Model Complexes. *Angew. Chem. Int. Ed.* **2012**, *51*, 2452-2456. (b) Teles, J. H.; Brode, S.; Chabanas, M. Cationic Gold(I) Complexes: Highly Efficient Catalysts for the Addition of Alcohols to Alkynes. *Angew. Chem. Int. Ed.* **1998**, *37*, 1415-1418. (c) Hattori, Y.; Kusamoto, T.; Nishihara, H. Enhanced Luminescent Properties of an Open-Shell (3,5-Dichloro-4-Pyridyl)Bis(2,4,6-Trichlorophenyl)Methyl Radical by Coordination to Gold. *Angew. Chem. Int. Ed.* **2015**, *54*, 3731-3734.
- (2) Ball, L. T.; Lloyd-Jones, G. C.; Russell, C. A. Gold-Catalyzed Oxidative Coupling of Arylsilanes and Arenes: Origin of Selectivity and Improved Precatalyst. *J. Am. Chem. Soc.* **2014**, *136*, 254-264.
- (3) (a) Zhdanko, A.; Maier, M. E. Quantitative Evaluation of the Stability of Gem-Diaurated Species in Reactions with Nucleophiles. *Organometallics* **2013**, *32*, 2000-2006. (b) Weber, D.; Tarselli, M. A.; Gagne, M. R. Mechanistic Surprises in the Gold(I)-Catalyzed Intramolecular Hydroarylation of Allenes. *Angew. Chem. Int. Ed.* **2009**, *48*, 5733-5736. (c) Schulz, J.; Shcherbachenko, E.; Roithová, J. Investigation of Geminally Diaurated Arene Complexes in the Gas Phase. *Organometallics* **2015**, *34*, 3979-3987. (d) Heckler, J. E.; Zeller, M.; Hunter, A. D.; Gray, T. G. Geminally Diaurated Gold(I) Aryls from Boronic Acids. *Angew. Chem. Int. Ed.* **2012**, *51*, 5924-5928.
- (4) Ball, L. T.; Lloyd-Jones, G. C.; Russell, C. A. Gold-Catalyzed Direct Arylation. **2012**, *337*, 1644-1648.
- (5) Liang, Y. F.; Steinbock, R.; Yang, L.; Ackermann, L. Continuous Visible-Light Photoflow Approach for a Manganese-Catalyzed (Het)Arene C-H Arylation. *Angew. Chem. Int. Ed.* **2018**, *57*, 10625-10629.
- (6) Kuhl, N.; Hopkinson, M. N.; Glorius, F. Selective Rhodium(III)-Catalyzed Cross-Dehydrogenative Coupling of Furan and Thiophene Derivatives. *Angew. Chem. Int. Ed.* **2012**, *51*, 8230-8234.
- (7) Frisch, M. J.; Trucks, G. W.; Schlegel, H. B.; Scuseria, G. E.; Robb, M. A.; Cheeseman, J. R.; Scalmani, G.; Barone, V.; Petersson, G. A.; Nakatsuji, H.; Li, X.; Caricato, M.; Marenich, A. V.; Bloino, J.; Janesko, B. G.; Gomperts, R.; Mennucci, B.; Hratchian, H. P.; Ortiz, J. V.; Izmaylov, A. F.; Sonnenberg, J. L.; Williams, Ding, F.; Lipparini, F.; Egidi, F.; Goings, J.; Peng, B.; Petrone, A.; Henderson, T.; Ranasinghe, D.; Zakrzewski, V. G.; Gao, J.; Rega, N.; Zheng, G.; Liang, W.; Hada, M.; Ehara, M.; Toyota, K.; Fukuda, R.; Hasegawa, J.; Ishida, M.; Nakajima, T.; Honda, Y.; Kitao, O.; Nakai, H.; Vreven, T.; Throssell, K.; Montgomery Jr., J. A.; Peralta, J. E.; Ogliaro, F.; Bearpark, M. J.; Heyd, J. J.; Brothers, E. N.; Kudin, K. N.; Staroverov, V. N.; Keith, T. A.; Kobayashi, R.; Normand, J.; Raghavachari, K.; Rendell, A. P.; Burant, J. C.; Iyengar, S. S.; Tomasi, J.; Cossi, M.; Millam, J. M.; Klene, M.; Adamo, C.; Cammi, R.; Ochterski, J. W.; Martin, R. L.; Morokuma, K.; Farkas, O.; Foresman, J. B.; Fox, D. J. Gaussian 16 Rev. B.01. **2016**.
- (8) CYLview, b. L., C. Y., Université de Sherbrooke, 2009 (<http://www.cylview.org>).
- (9) (a) Ess, D. H.; Houk, K. N. Theory of 1,3-Dipolar Cycloadditions: Distortion/Interaction and Frontier Molecular Orbital Models. *J. Am. Chem. Soc.* **2008**, *130*, 10187-10198. (b) Ess, D. H.; Houk, K. N. Distortion/Interaction Energy Control of 1,3-Dipolar Cycloaddition Reactivity. *J. Am. Chem. Soc.* **2007**, *129*, 10646-10647. (c) Bickelhaupt, F. M.; Houk, K. N. Analyzing Reaction Rates with the Distortion/Interaction-Activation Strain Model. *Angew. Chem. Int. Ed.* **2017**, *56*, 10070-10086. (d) Fernandez, I.; Bickelhaupt, F. M. The Activation Strain Model and Molecular Orbital Theory: Understanding and Designing Chemical Reactions. *Chem. Soc. Rev.* **2014**, *43*, 4953-4967. (e) Morokuma, K. A Consistent and Accurate Ab Initio Parametrization of Density Functional Dispersion Correction (Dft-D) for the 94 Elements H-Pu. *J. Chem. Phys.* **1971**, *55*, 1236.
